1 **Design of logistics Indicators for Monitoring the Covid-19 Vaccination Process in Colombia**

2

3 *Logistic Indicators for Vaccination Process*

4

5 Nubia Velasco (Corresponding author) [[nvelasco@uniandes.edu.co](mailto:nvelasco@uniandes.edu.co)]

6 School of Management - Universidad de Los Andes

7 ORCID: 0000-0002-5717-4998

8 Edificio Julio Mario Santo Domingo

9 Calle 21 # 1-20,

10 111711Bogotá - Colombia

11

12 Andrea Herrera [[a-herrer@uniandes.edu.co](mailto:a-herrer@uniandes.edu.co)]

13 School of Engineering - Universidad de Los Andes

14 ORCID: 0000-0003-2898-7161

15 Edificio Mario Laserna

16 Cra 1 E ste N° 19A – 40

17 11171 Bogotá – Colombia,

18

19 Johanna Trujillo-Diaz [[j.trujillo2@uniandes.edu.co](mailto:j.trujillo2@uniandes.edu.co)]

20 School of Medicine - Universidad de Los Andes

21 ORCID: 0000-0001-6243-6393

22 Carrera 1 No 18 A - 10

23 Bloque Q Piso 8

24 111711 Bogotá - Colombia;

25 Current address:

26 Fundación Universitaria Internacional de la Rioja

27 Calle 100-19 – 61

28 Edificio Centro Empresarial Oficina 1101

29 111121 – Bogotá – Colombia

30

31 Ciro-Alberto Amaya [[ca.amaya@uniandes.edu.co](mailto:ca.amaya@uniandes.edu.co)]

32 School of Engineering - Universidad de Los Andes

33 ORCID: 0000-0003-1537-1616

34 Edificio Mario Laserna

35 Cra 1 E ste N° 19A – 40

36 111711 Bogotá – Colombia,

37

38 Catalina González-Uribe [[cgonzalez@uniandes.edu.co](mailto:cgonzalez@uniandes.edu.co)]

39 School of Medicine - Universidad de Los Andes,

40 ORCID: 0000-0002-3322-5017

41 Carrera 1 No 18 A - 10

42 Bloque Q Piso 8

43 111711 Bogotá - Colombia;

44

45 Estefania Hernandez [[e.hernandez12@uniandes.edu.co](mailto:e.hernandez12@uniandes.edu.co)]

46 School of Management - Universidad de Los Andes

47 ORCID: 0000-0002-3689-8209

48 Edificio Julio Mario Santo Domingo

49 Calle 21 # 1-20,

50 111711Bogotá - Colombia

51 **Abstract:**

52 The vaccine supply chain (VSC) integrates all the activities from production to dispensing. It is characterized  
53 by its complexity and low responsiveness, highlighting the importance of defining key performance  
54 indicators (KPIs). The design science research methodology was used to develop 38 KPIs, which were  
55 grouped into humanitarian and technological dimensions. The former includes demographic,  
56 epidemiological, and vaccination indicators, while the latter is classified into five groups according to the  
57 echelons of the supply chain. Public and private health organizations and research groups validated the  
58 indicators. They were calculated and recorded daily to monitor the logistics progress of the National  
59 Vaccination Plan against covid-19 in Colombia. These tailored KPIs, made it possible to evaluate and  
60 compare the results of the execution and effectiveness of public policies, and to redefine the strategies,  
61 showing that the logistics point of view helps identify the impact of good practices and transfer them  
62 promptly.

63  
64 **Keywords:** Key logistics performance indicators, Vaccine Supply Chain, Design science research, Mass  
65 vaccination, Covid-19 vaccination.

66 **1. Introduction**

67 The vaccine supply chain (VSC), like other supply chains, integrates all the necessary activities and  
68 interactions from the production process until the vaccines reach the population. According to de Carvalho  
69 et al. [1], the VSC involves five levels, from suppliers to vaccinated individuals. The first two steps are  
70 included in the manufacturing process, while the last three are part of the delivery process. Once a vaccine  
71 is produced, it is shipped for international distribution and stored under specific conditions. The last step is  
72 the delivery to different customers (countries) where, according to specific policies, it is distributed to the  
73 final consumer. This research aims to establish KPIs to evaluate the performance of VSCs in the particular  
74 case of covid-19 vaccination in the context of the National Vaccination Plan (PNV by its acronym in Spanish)  
75 in Colombia to provide suggestions to support decision-making and improve vaccination operations.  
76 Before the covid-19 pandemic, VSCs were already considered complex due to three main factors: product  
77 complexity, globalization, and regulation [1], and thus, a proper reconciliation of economic, technological,

78 and value key performance indicators (KPIs) is required to identify the real impact of vaccination programs  
79 [2]. Regarding their last mile, Duijzer et al. [3] demonstrated that the increasing number of studies on VSCs  
80 reflects the importance of logistics in the success of vaccination campaigns. Additionally, Shah [4] identified  
81 the need to improve the responsiveness of VSCs. Specifically, the author states that in the case of an  
82 emergency such as bioterrorism or fast-developing epidemics, the responsiveness of VSCs is slow, taking up  
83 to 24 months from vaccine development to reaching consumers [5]. Furthermore, Zaffran et al. [6] identified  
84 the necessity of strengthening the VSC in different dimensions as information management, human  
85 resources, and optimization, among others; nevertheless, most of the recent works have been developed for  
86 the optimization of supply chain [7] and Lemmens et al. [8] in their literature review on supply chains  
87 models, identified key issues specifically for VSCs, one of them being performance measures. Subsequently,  
88 Lemmens et al. [2] proposed a general framework for defining KPIs for VSCs, considering that these supply  
89 chains should support access to medicines. To our knowledge, this is the first and only framework designed  
90 for VSCs, and the authors proposed three dimensions of KPIs: economic, technological, and value or  
91 humanitarian. Firstly, the economic dimension includes measures such as cost, profit, economic value  
92 added, and net present value, widely known concepts determined by internal factors and by external  
93 aspects such as competition, government, and donor policies. Secondly, the technological dimension  
94 represents the performance of the supply chain in terms of resource utilization, capacity, lead time,  
95 throughput, and vulnerability to uncertainties in the supply, such as demand (coverage), and in operations,  
96 such as responsiveness, volume, and delivery flexibility, and reliability, among others. Finally, the value or  
97 humanitarian dimension refers to the ethical, social, and individual values related to VSCs. Examples of  
98 indicators in this dimension are vaccine availability, number of fully immunized people, equity, and  
99 disability-adjusted life years (DALY).

100 Furthermore, at the end of 2019, covid-19 emerged, and in March 2020, a coronavirus disease pandemic  
101 was declared. Immediately, along with measures to prevent its spread, vaccination appears as a strategy to  
102 counteract it. The process of vaccination against covid-19 (CVP) has several objectives: a) to reduce the risk  
103 of death and prevent a severe course of the disease; b) to maintain essential health services and their  
104 infrastructure available; c) to protect employment and the economy [9]. To achieve these objectives,

105 countries developed mass vaccination plans that can be viewed as a supply chain directly involving entities  
 106 in the upstream and downstream flow of products and information [10]. When CVPs started, the supply  
 107 strategy was limited to allocation focused on reducing mortality and morbidity rates, with priority given to  
 108 age-group vaccination [11, 12]. Supply was the bottleneck [12, 13], as vaccines were in low supply and high  
 109 demand [14], making the application of the first doses slow [11]. Supply, distribution, and logistics in the  
 110 CVPs were the ones that marked the flow and speed of vaccination [15], and Colombia was no exception.  
 111 The covid-19 VSC in Colombia, proposed by the Ministry of Health and Social Protection (MSPS by its  
 112 acronym in Spanish), was based on the Expanded Immunization Program (PAI by its acronym in Spanish). To  
 113 increase capacity and minimize the risk of waste [16], the PNV supply chain has a five tiers structure [17]: (1)  
 114 global vaccine manufacturing laboratories, (2) a central warehouse (located in Bogotá), (3) departmental or  
 115 municipal health secretariats, (4) health service provider institutions (IPs by its acronym in Spanish), and (5)  
 116 vaccination centers. Figure 1 represents the Colombian covid-19 VSC. On the left, the macro-logistics is  
 117 represented with Bogotá in the center of the Colombian map, the second tier, and the 37 territorial entities  
 118 representing the health secretariats. On the right side, the micro-logistic process is depicted.

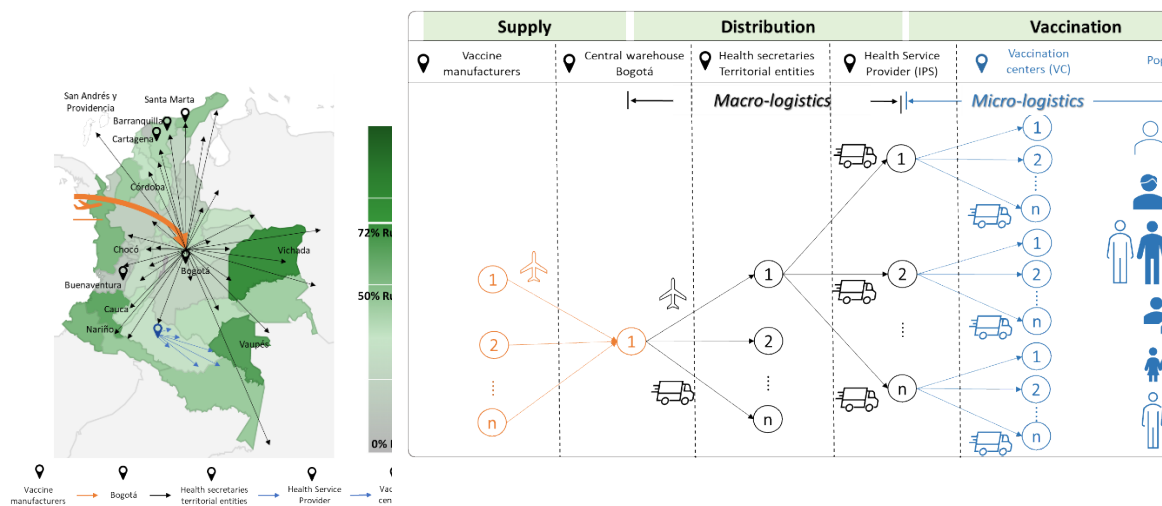

119 Figure 1. Colombian covid-19 vaccine supply chain[17].

120

121 The allocation and distribution of vaccines to territorial entities were made according to an effectiveness

122 criterion that depends on the vaccine availability, the doses allocated, and the vaccines administered [18].

123 However, these indicators do not reflect the specificities and peculiarities of the territorial entities, and they  
124 do not suggest the impact of logistics activities on the performance of the PNV.

125 To identify VSCs indicators and, specifically, those used in the covid-19 VSC, we conducted a review of covid-  
126 19 vaccination dashboards that we classified according to three objectives: a) to track reactions in patients  
127 vaccinated against covid-19 [19]; b) to monitor vaccination progress by a geographical location (worldwide,  
128 regional, or local) [9, 19-22], and c) to track operations in vaccination centers [19]. In the second and third  
129 groups, more than 30 key metrics were found to measure geographic coverage. These KPIs were grouped by  
130 similarity and are summarized in Table 1.

131 Table 1. Indicators published in dashboards and articles.

---

KPI

---

Doses administered per date and vaccine manufacturer [13]

Cumulative vaccines distributed by province and similar [23-25]

Deliveries by the manufacturer [13]

Doses available per manufacturer and similar [13]

Vaccination centers [24]

Percentage of people vaccinated [25]

Total number of vaccine doses administered [25]

7-day rolling average of doses administrated [19]

Time to herd immunity [13]

Deaths avoided [13]

People fully vaccinated [25]

People vaccinated by region [23, 24]

People vaccinated with first and second doses [13, 23-25]

Number of doses administered per period (Daily/Weekly/Monthly) [13, 23]

People vaccinated/Coverage by age group [13, 19, 23]

People vaccinated by gender and similar [13, 19, 23-25]

---

---

KPI

---

Vaccination in rural regions behaviors [24]

Doses administered per race and ethnicity and similar [23]

Vulnerable population vaccinated [23]

---

132

133 As shown in Table 1, most KPIs are defined for the humanitarian dimension, but few are related to the  
134 technological dimension of VSCs. To the best of our knowledge, there is no study aimed at charting the daily  
135 progress of the covid-19 vaccination process in terms of the VSC.

136

## 137 **2. Materials and Methods**

138 We used the design science research (DSR) approach to identify KPIs and design the dashboard, which has  
139 proven helpful in this context [13, 17]. DSR is a problem-solving paradigm that seeks to build a working  
140 artifact (i.e., the dashboard). Its relevance is based on the applicability of the artifact in practice (i.e.,  
141 monitoring the vaccination process to enable faster response). DSR is an iterative improvement  
142 methodology, and each iteration is composed of six stages [17] (1) problem identification and motivation,  
143 (2) goal definition and solution, (3) design and development, (4) demonstration, (5) evaluation, and, (6)  
144 communication.

145 The KPIs proposed are based on available structured and unstructured official information sources We  
146 included all available structured and unstructured official information sources to design the KPIs, as shown  
147 in Table 2. Unstructured official sources include the MSPS Twitter, vaccine allocation resolutions, and MSPS  
148 infographics, while structured ones include demographic data by territorial entities, open data on  
149 vaccination progress and vaccine arrivals, and open data on SARS-CoV infection.

150

151 Table 2. Structured and unstructured data sources

| Data source                                                               | Periodicity                              | Source description                                                                                                          | Data                                                                                                                                                                                                     |
|---------------------------------------------------------------------------|------------------------------------------|-----------------------------------------------------------------------------------------------------------------------------|----------------------------------------------------------------------------------------------------------------------------------------------------------------------------------------------------------|
| 1. Vaccine purchase agreements and information on arrivals in the country | According to the periodicity of arrivals | Structured open online spreadsheet [26] and unstructured official information from Twitter.                                 | - Date<br>- Type of agreement<br>- Number of doses arrived per manufacturer<br>- National distribution resolution ID<br>- Date of allocation                                                             |
| 2. Vaccine allocation resolutions by territorial entities (supply)        | Weekly                                   | Unstructured information on government resolutions in PDF format [27] and structured open information in JSON format [28]   | resolution Month<br>- Vaccine allocation resolution number<br>- Territorial entity code<br>- Department name<br>- Vaccine manufacturer<br>- Description of the prioritization stage according to the PNV |
| 3. Infographics on the progress of the PNV                                | Daily                                    | Unstructured data on the progress of vaccination by the territorial entity, by dose, and total population (PNG format) [29] | - Number of doses administered per day<br>- Number of doses administered per territorial entity<br>- Total vaccinated population                                                                         |
| 4. Regional report on vaccination progress                                | Daily                                    | Structured open Google sheets [26]                                                                                          | - Total non-vaccinated population                                                                                                                                                                        |

| Data source                        | Periodicity | Source description                                                          | Data                                                      |
|------------------------------------|-------------|-----------------------------------------------------------------------------|-----------------------------------------------------------|
|                                    |             |                                                                             | - Month                                                   |
|                                    |             |                                                                             | - Territorial entity code                                 |
| 5. Migratory flows and immigration | Monthly     | Structured data filtered from Tableau [30, 31]                              | - Type of passenger (motivation for entering the country) |
|                                    |             |                                                                             | - Country of departure                                    |
| 6. Vaccination centers             | Once        | Structured open spreadsheet [32]                                            | - Number                                                  |
|                                    |             |                                                                             | - Location                                                |
| 7. Demography                      | Once        | Structured open spreadsheet [33]                                            | - Territorial entity code                                 |
|                                    |             |                                                                             | - Territorial entity name                                 |
|                                    |             |                                                                             | - Rural and dispersed population                          |
|                                    |             |                                                                             | - Population per territorial entity Latitude              |
|                                    |             |                                                                             | - Longitude                                               |
| 8. Infection                       | Daily       | Structured open online database using JSON format filtered by Colombia [34] | - Colombian infection ID                                  |
|                                    |             |                                                                             | - Date                                                    |
|                                    |             |                                                                             | - Territorial entity code                                 |

152

153 Based on the above data sources and after validation with stakeholders of the health ecosystem in  
154 Colombia, 38 indicators were defined [35]. Some of them were adapted from the literature, and others were  
155 proposed to consider the characteristics of the covid-19 vaccination process: massive, with different types of  
156 vaccines and involving two doses and boosters, among others. Economic metrics were not considered due  
157 to a lack of information about vaccination costs and because, in the case of covid-19 vaccination, the  
158 purpose was to vaccinate people quickly. Following the classification proposed by Lemmens et al. [2], we



159 grouped the KPIs into the humanitarian and technological dimensions. In the humanitarian dimension, in  
 160 addition to the KPIs related to vaccination (C), we included epidemiological indicators for covid-19 (A) and  
 161 demographic indicators (B) to identify the territorial entities with the greatest need and the level of  
 162 efficiency of their processes. The technological ones are classified into five groups, according to the echelons  
 163 in the supply chain: (D) supply and distribution, (E) capacity, (F) coverage, (G) forecasting, and (H) logistics.  
 164 The latter was included, considering the need to track vaccine availability and establish allocation and  
 165 distribution policies. Table 3 shows the indicators for each group, and Appendix A contains the equation that  
 166 defines each indicator.

167

168 Table 3. Indicators designed and validated through iterations.

| KPI          | KPI                 | Taken/Adapted from literature                        | Proposed                                                                                                      |
|--------------|---------------------|------------------------------------------------------|---------------------------------------------------------------------------------------------------------------|
| Dimension    |                     |                                                      |                                                                                                               |
| Humanitarian | (A) Demographic     | Percentage of rural population by territorial entity | Percentage of immigrant population by territorial entity                                                      |
|              |                     | Percentage of women by territorial entity            | Qualified population by stage by vaccination center in each territorial entity ( $PeVp_i$ )                   |
|              |                     | Percentage of men by territorial entity              |                                                                                                               |
|              | (B) Epidemiological |                                                      | Covid-19 infection per 10,000 inhabitants (PDCo10000)<br>Doses administered per 10,000 inhabitants (DAo10000) |
|              | (C) Vaccination     | Cumulative doses administered (CQVAp)                | Population fully vaccinated by territorial entity ( $PFV_i = P2d_i$ )                                         |

| KPI           | KPI                         | Taken/Adapted from literature                                                            | Proposed                                               |
|---------------|-----------------------------|------------------------------------------------------------------------------------------|--------------------------------------------------------|
| Dimension     |                             |                                                                                          |                                                        |
|               |                             | Cumulative quantity of booster doses administered (CQbVAp)                               | Unvaccinated population (UP)                           |
|               |                             | Population with one dose (P1d)                                                           | Missing doses (Md), assuming to have at least one dose |
|               |                             | Population fully vaccinated (PFV =P2d)                                                   | Demand for missing doses by territorial entity (DMdi)  |
| Technological | (D) Supply and distribution | Cumulative quantity of vaccine doses allocated (CQVAs)                                   |                                                        |
|               |                             | Allocation progress by territorial entity ( $AA_s_i$ )                                   |                                                        |
|               |                             | Cumulative number of doses allocated by brand ( $CQVAs_b$ )                              |                                                        |
|               |                             | Percentage of doses allocated by brand ( $\%QVAs_b$ )                                    |                                                        |
|               |                             | Number of doses allocated by brand per 10,000 inhabitants ( $QVAs1000_b$ )               |                                                        |
|               |                             | Number of doses allocated per 10,000 inhabitants by territorial entity ( $QVAs10000_i$ ) |                                                        |
|               | (E) Capacity                | Vaccination centers per 10,000 inhabitants by territorial entity ( $Vc10000_i$ )         | Used capacity by territorial entity ( $UCa_i$ )        |

| KPI       | KPI             | Taken/Adapted from literature                                                                 | Proposed                                                               |
|-----------|-----------------|-----------------------------------------------------------------------------------------------|------------------------------------------------------------------------|
| Dimension |                 |                                                                                               |                                                                        |
|           |                 |                                                                                               | Capacity required by territorial entity<br>( $NCa_i$ )                 |
|           |                 |                                                                                               | Installed capacity effectiveness by territorial entity ( $CUL_i$ )     |
|           |                 |                                                                                               | Estimation of the necessary capacity by territorial entity ( $Pnc_i$ ) |
|           | (F) Coverage    | Vaccination progress (AV)                                                                     |                                                                        |
|           |                 | Vaccination progress by territorial entity ( $AV_i$ )                                         |                                                                        |
|           |                 | Average vaccination progress (AVP)                                                            |                                                                        |
|           |                 | Execution progress (EP)                                                                       |                                                                        |
|           |                 | Vaccination rate (VR)                                                                         |                                                                        |
|           | (G) Forecasting | 7-day rolling average number of doses administered (AQVApW)                                   |                                                                        |
|           |                 | 7-day rolling maximum number of doses administered (MQVApW)                                   |                                                                        |
|           |                 | Days to herd immunity (vaccinating at the 7-day rolling average number of doses administered) |                                                                        |
|           |                 | Days to herd immunity (vaccinating at the 7-day rolling                                       |                                                                        |

| KPI Dimension | KPI           | Taken/Adapted from literature         | Proposed                                                                                                             |
|---------------|---------------|---------------------------------------|----------------------------------------------------------------------------------------------------------------------|
|               |               | maximum number of doses administered) |                                                                                                                      |
|               | (H) Logistics |                                       | Inventory (I)<br>Days of inventory (Id)<br>Inventory by territorial entity per 10,000 inhabitants ( $I_{te10000i}$ ) |

169

170 A snowflake data model was defined to manage the data sources and generate all the indicators (see  
 171 Appendix B). The snowflake is composed of a fact table (called time series) that includes the eight groups of  
 172 indicators and seven dimensions tables: (1) international vaccines purchase agreements and arrivals, (2)  
 173 demographic information, (3) national distribution, (4) vaccination progress, (5) covid-19 infection, (6)  
 174 migration information, and (7) time; and their attributes [36]. Data were daily collected and the KPIs were  
 175 generated by department, major cities, and by stage of the PNV.

176 Since the objective is to track the logistics progress of the PNV, we developed a Google Studio dashboard  
 177 divided into three parts: (a) PNV progress and projections, (b) PNV logistics KPIs, and (c) capacity and  
 178 efficiency of vaccination centers; progress was daily tracked starting on 17th of February; with the defined  
 179 goal being to vaccinate at least 70% of population (herd immunity) by December 31st, 2021. To better  
 180 communicate the progress of the PNV to stakeholders, we generated a monthly newsletter summarizing the  
 181 progress and the main leading suggestions derived from the analysis of the logistics KPIs. The newsletter was  
 182 composed of seven sections: a) population to be covered; b) progress by geographical entity; c) vaccination  
 183 rate; d) comparison among doses assigned, administered, and inventory; e) supply and demand analysis; f)  
 184 estimated completion date; g) available inventory by population [37]. The indicators and the dashboard  
 185 were socialized with the departmental and municipal health secretaries to support their decision-making  
 186 associated with the PNV. The first dashboard was published on April 22nd, 2021. The last newsletter  
 187 summarizing the results of the PNV was shared with the MSPS and other stakeholders in March 2022 [38].

### 188 3. Results

189 The 38 proposed KPIs were used to track the logistics progress of the Colombian PNV from February 16th to  
190 December 31st 2021, the time window defined by the MSPS to vaccinate 70% of the population (i.e.,  
191 administering more than 70M doses). Each day, information published in different sources was manually  
192 uploaded to a database (see Table 2), which automatically computed the KPIs according to the snowflake  
193 data model (see Appendix B). The calculations were displayed in a dashboard developed on Google Studio,  
194 available on the COLEV website ([https://colev.uniandes.edu.co/22-colev-en-accion/192-avance-nacional-de-](https://colev.uniandes.edu.co/22-colev-en-accion/192-avance-nacional-de-vacunacion-2)  
195 [vacunacion-2](https://colev.uniandes.edu.co/22-colev-en-accion/192-avance-nacional-de-vacunacion-2)). The main results by KPI group are discussed below.

196 Regarding demographic indicators, the PNV was modified throughout 2021 to include more population.  
197 Thus, by December 31<sup>st</sup> 2021, 95% of Colombian inhabitants were eligible to be vaccinated, including those  
198 over three years of age and regular and non-regular migrants. 36% of the population belongs to stage five  
199 (between 11 and 39 years of age), 14,4% are between 3-11 years of age, followed by stage 1 with 12,6% of  
200 the population. The higher concentration of people is located in Bogotá, Antioquia, Valle del Cauca, and  
201 Cundinamarca, the country's center.

202 According to the National Administrative Department of Statistics (DANE by its acronym in Spanish) [33],  
203 departments such as Vichada and Vaupés have the highest percentage of rural population with 72% and  
204 65%, respectively, followed by Cauca (62%), Nariño (55%), and Choco (54%). In these departments, a  
205 different strategy may be needed to achieve the PNV goal and cover the population.

206

207 In addition, epidemiological indicators show that at the end of 2021, covid-19 infections per 10,000  
208 inhabitants (Figure 2(a)) were mainly reported in the center of the country (darker red), apart from the  
209 departments of Amazonas and Atlántico, which are considered departments with high entry/exit of people  
210 and trade. This KPI reflects where the covid-19 transmission was more intensive, indicating regions where  
211 the vaccination needed to be accelerated.

212 Figure 2(b) shows the doses administered per 10,000 inhabitants up to December 31st. Departments in the  
213 center of the country have a higher allocation, while the eastern departments present the lowest allocation.

214 Additionally, some of the departments in orange (Chocó, Cauca and Putumayo) in the western part of the  
215 country are departments with geographical areas with significant socioeconomic inequalities.

216

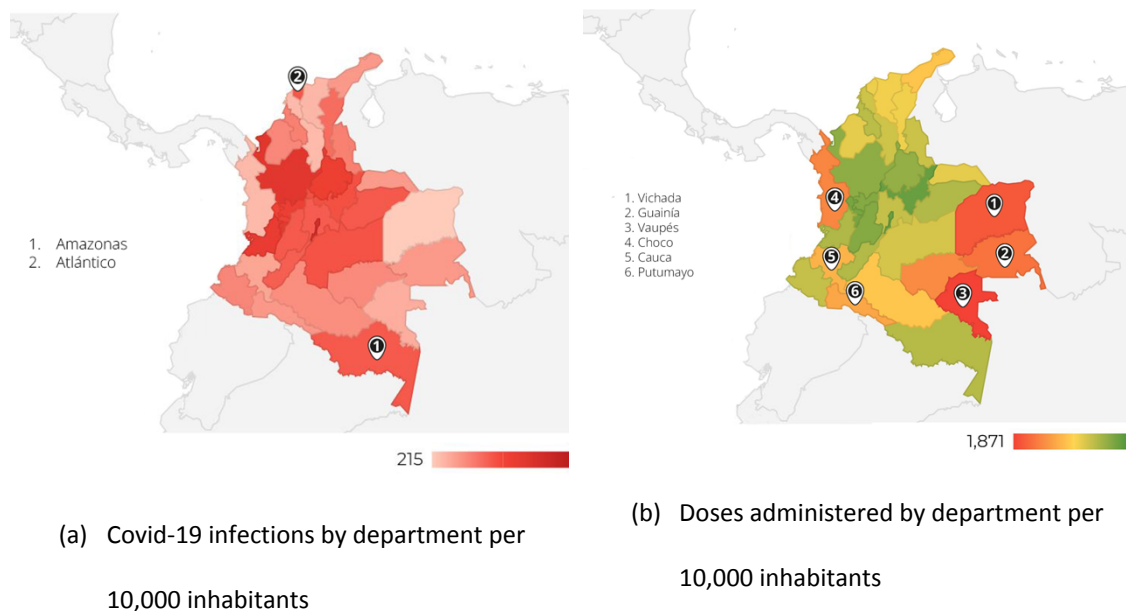

217 Figure 2. Epidemiological KPIs.

218

219 Regarding vaccination results, the PNV reached 55.5% (28.3M) of fully vaccinated population, 19.6% (10M)  
220 with one dose, and 6.5% with a booster dose (3.3M) [29], surpassing countries such as Russia, Poland,  
221 Bulgaria, Bolivia, Venezuela, and Nicaragua [34]. As of December 31st, there was an 18.4% of unvaccinated  
222 population.

223 Regarding the monthly vaccination progress, represented by the cumulative doses administered per month  
224 (Figure 3), there was an increase in the cumulative number of doses administered from May to August,  
225 explained by the opening stages and by the administration of second doses, which were the highest  
226 proportion from July to December (green bars). The population that started the vaccination scheme was  
227 constant from August to December (orange bars – Population with one dose). In July, Colombia began to  
228 dispense a mono-dose vaccination scheme, which also contributed to accelerating the immunization  
229 process, mainly from September onwards (green line representing the percentage of population fully  
230 vaccinated).

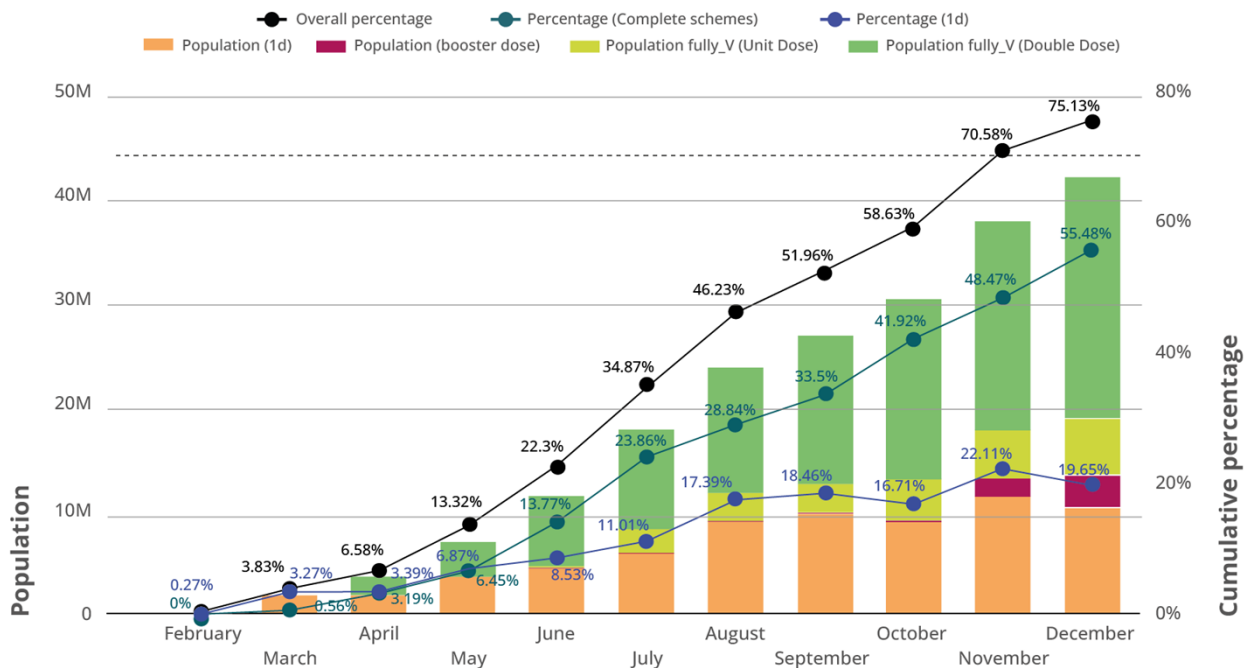

231

232 Figure 3. PNV monthly progress.

233

234 Figure 3 shows how people vaccinated with second doses (green bars) began to replace those who started  
 235 the vaccination scheme (orange bars), representing half of all doses administered from September to  
 236 December. It is important to note the increase from October to November due to the expansion of the  
 237 qualified population to be vaccinated (children and migrants) and the requirement of a vaccination card to  
 238 access public spaces.

239 Regarding supply and distribution, vaccines from different laboratories were administered in Colombia.

240 From February to June, the vaccines allocated were mainly Pfizer and Sinovac. In March and April, some

241 doses arrived from AstraZeneca. In June, Colombia received the first batch of Janssen, which made it

242 possible to administer the mono-dose vaccine scheme. The country received Moderna vaccines through

243 direct negotiation and donation from July to December. At the end of the year, Sinovac (29,3%) and Pfizer

244 (26,1%) were the most allocated vaccines, followed by AstraZeneca (17,8%), Moderna (17,6%) and Janssen

245 (9,2%), the former mainly allocated to rural territories. Figure 4 shows the number of doses allocated by

246 brand.

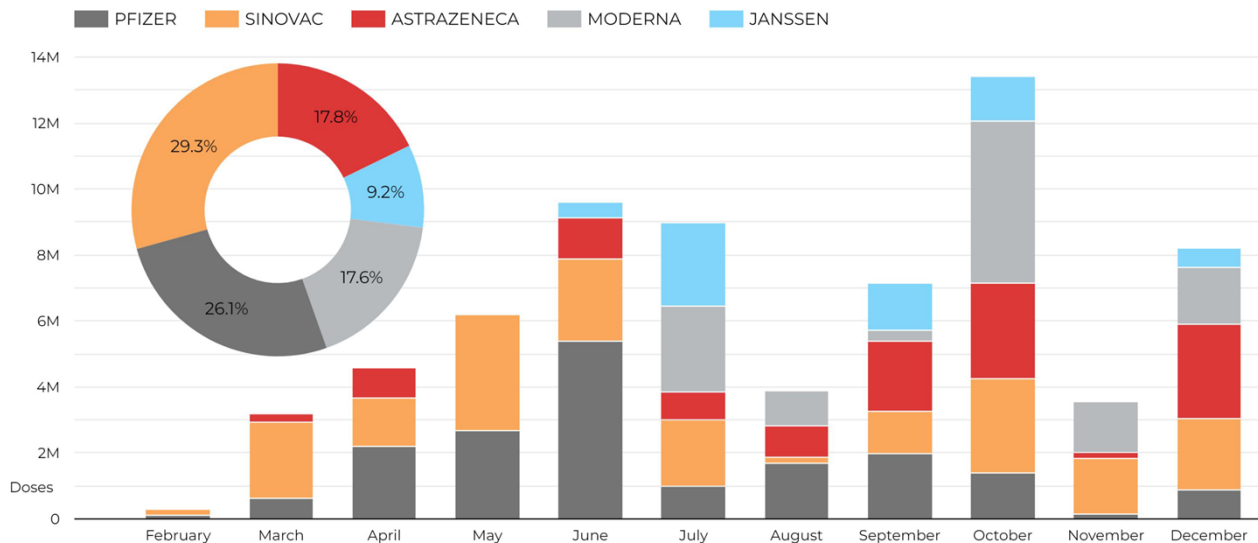

247

248 Figure 4. A cumulative number of doses allocated per brand.

249

250 Regarding the number of doses allocated per month, October was the month with the highest number of  
251 doses allocated, given the increased frequency of arrivals. In contrast, the same month presented a low  
252 vaccination rate (see Figure 4), reflecting the need to increase the population target.

253 In terms of capacity, Figure 5 shows the progress over the year of capacity required, and capacity used. The  
254 required capacity (red line) indicates the vaccination level per center needed to meet the PNV goal, while  
255 the used capacity (green line) indicates the number of doses administered per vaccination center. In general,  
256 the country was below the required capacity, except for few days during July and August, mainly due to the  
257 opening of stages 4 and 5. This result showed from the beginning that the country would not be able to  
258 administer the doses needed to achieve herd immunity.

259



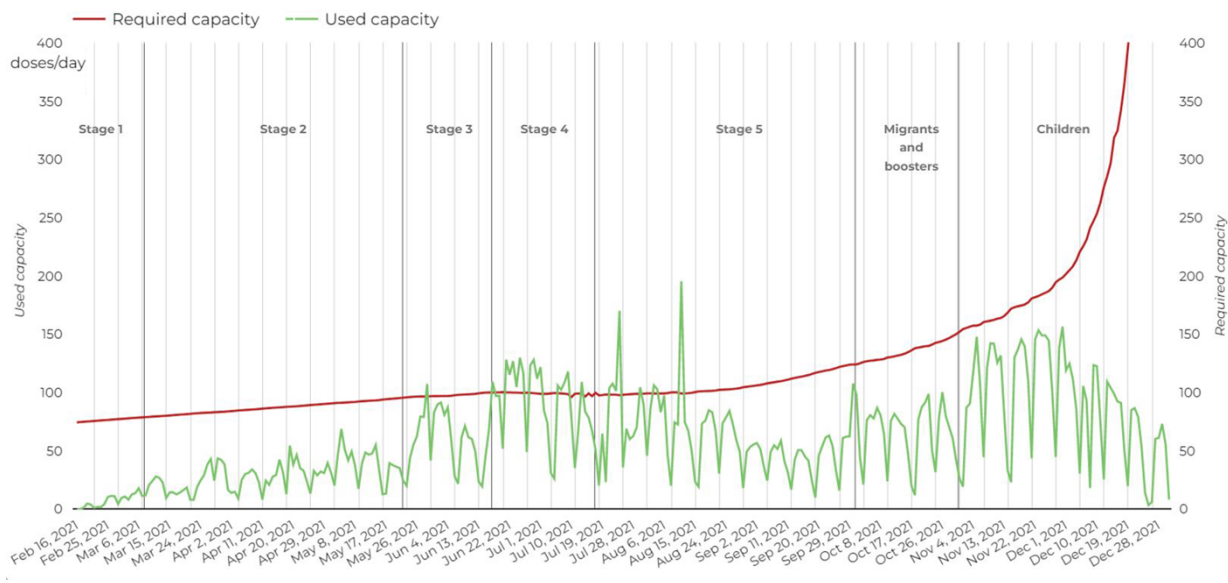

260

261 Figure 5. Analysis of the used and required capacity progress.

262 We made a comparative analysis among departments, using the qualified population (see Figure 6(a)), the

263 number of vaccination centers per 10,000 inhabitants (see Figure 6(b)), and the installed capacity

264 effectiveness (see Figure 6(c)), estimated as the ration between the used capacity and the required capacity

265 (see Appendix A). Figure 6(a) shows that Vaupés is the department with the lowest population qualified to

266 be vaccinated, with the highest number of vaccination points per 10,000 inhabitants and with the lowest

267 installed capacity effectiveness (Figure 6(c)), then, Vaupés needs to better use its installed capacity. In

268 contrast, Antioquia has the highest number of people qualified to be vaccinated, a small ratio of vaccination

269 centers per 10,000 inhabitants, which are efficient used (Figure 6(b)), with an installed capacity effectiveness

270 greater than one, indicating that their used capacity is greater than the capacity they need.

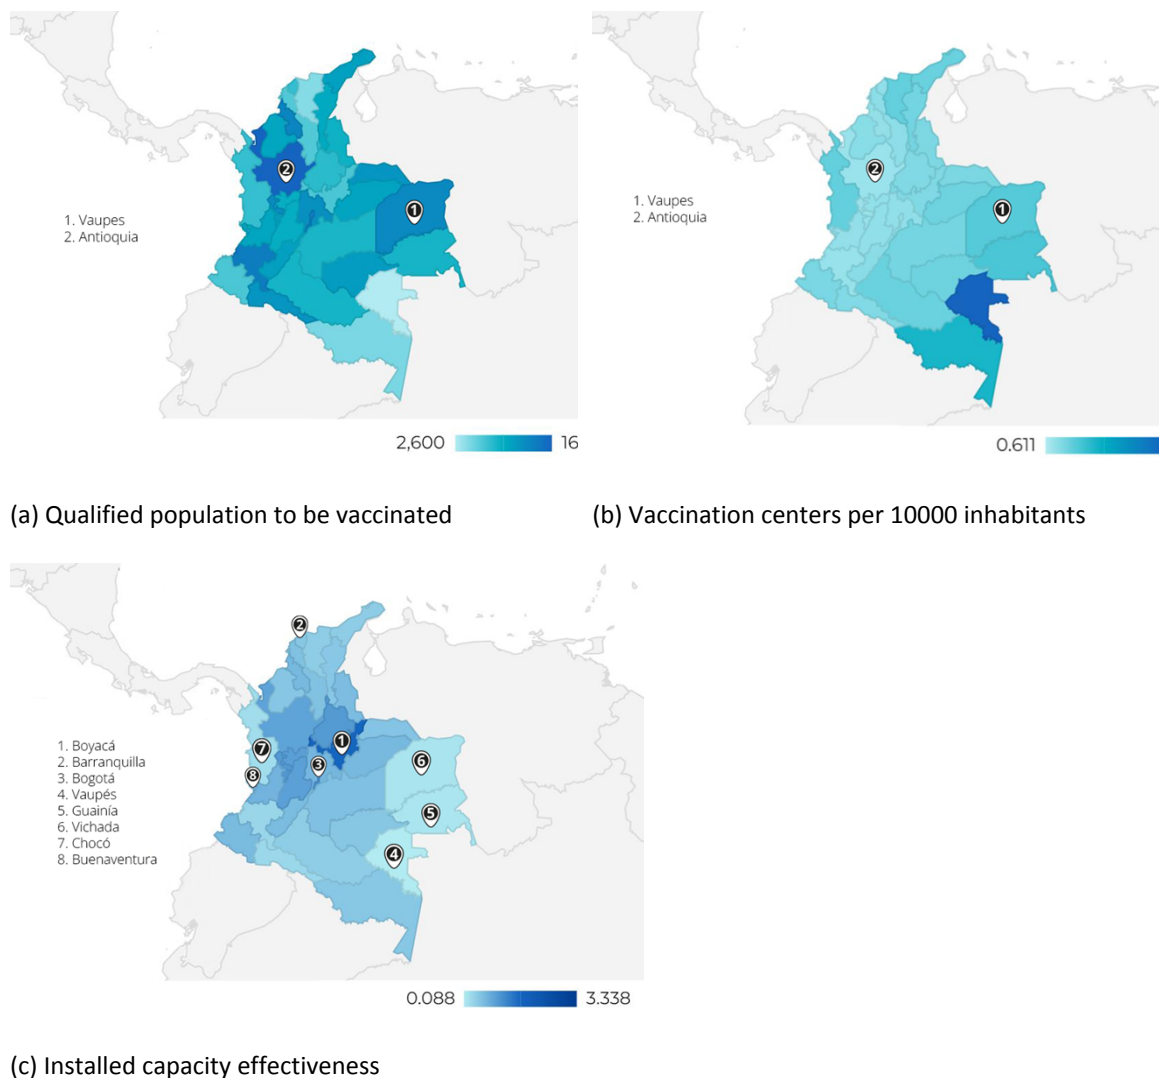

271 Figure 6. Capacity KPIs.

272

273 Considering the installed capacity effectiveness, the most efficient territories were San Andrés y Providencia  
274 (333%), Boyacá (170%), Barranquilla (167%), and Bogotá (115%) with capacity utilization of over 100%,  
275 indicating efficiency in the use of resources. While departments such as Vaupés (8,33%), Guainía (16,33%),  
276 Vichada (16,96%), Chocó (25,28%), and Buenaventura (29,74%) showed low efficiencies, mainly due to a low  
277 level of vaccine allocation (see Figure 2(b)).

278 With respect to coverage, after 318 days of PNV operation, 69M doses were allocated, of which 64.7M were  
279 administered [29]. At the beginning, between February 16th and May 21st, two stages were opened (out of  
280 five), at this time the daily vaccination rate was below the daily target (horizontal dotted line in Figure 7), set

281 by the National Government at 250K doses. At the end of May, the government decided to accelerate the  
282 opening of the PNV stages, thus giving the opportunity to more population to access to vaccine. This action  
283 allowed increasing the daily vaccination up to 600K doses. However, for the fifth and last stage, the daily  
284 vaccination rate decreased rapidly, and by early August, this indicator fell below the target. Given this  
285 reduction, in October, vaccination was opened to the migrant population while the MSPS adopted booster  
286 doses. In addition, at the end of October, children aged 3 to 11 years were included in the PNV, and finally,  
287 at the end of November, to reactivate local businesses, a vaccine certification was required for access to  
288 public spaces. Thanks to these measures, the country reached 90% of the goal.

289 Figure 7 shows that, throughout the vaccination period, Sundays were the day with the lowest vaccination  
290 rate. Additionally, the vaccination rate increased each time a new stage was opened, or a new government  
291 policy was implemented.

292

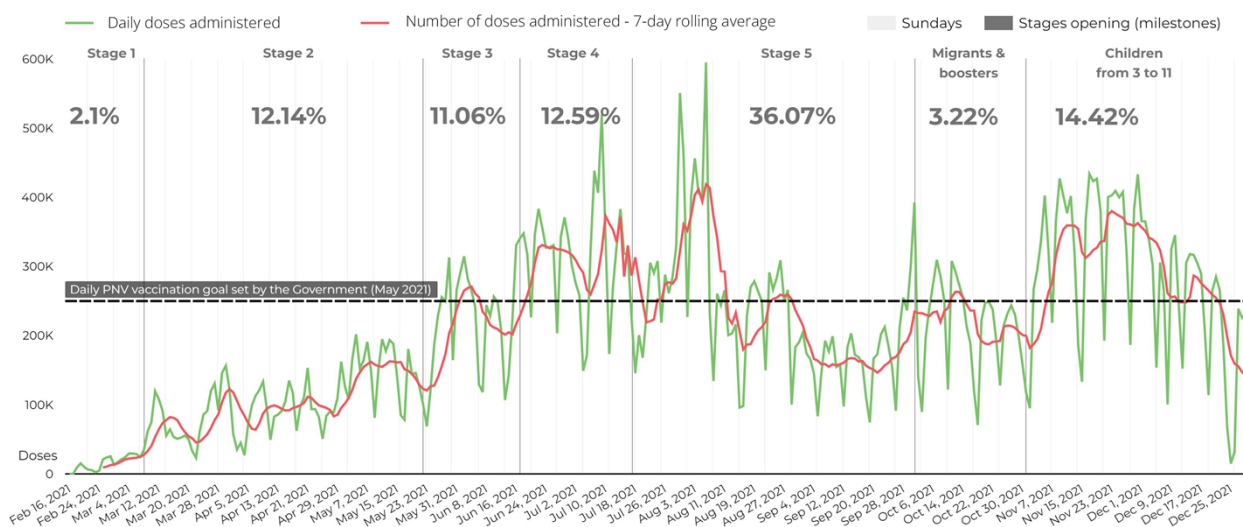

293

294 Figure 7. Daily vaccination rate.

295 Concerning performance by territorial entity (Figure 8(a)), Barranquilla, Bogotá, and Cartagena, cities with  
296 large populations, exceeded 70% of the population vaccinated. Similar results were obtained by  
297 departments such as Risaralda, Caldas, and Quindío, small departments in terms of surface area. Although  
298 their population is rural, short distances facilitate distribution and coverage. Boyacá presented the best  
299 results, and the main reason is good management of vaccination progress. San Andrés y Providencia [39]

300 and Amazonas [40] also exceeded 70% of the vaccinated population because a prioritization policy was  
301 applied given their geographic characteristics.

302

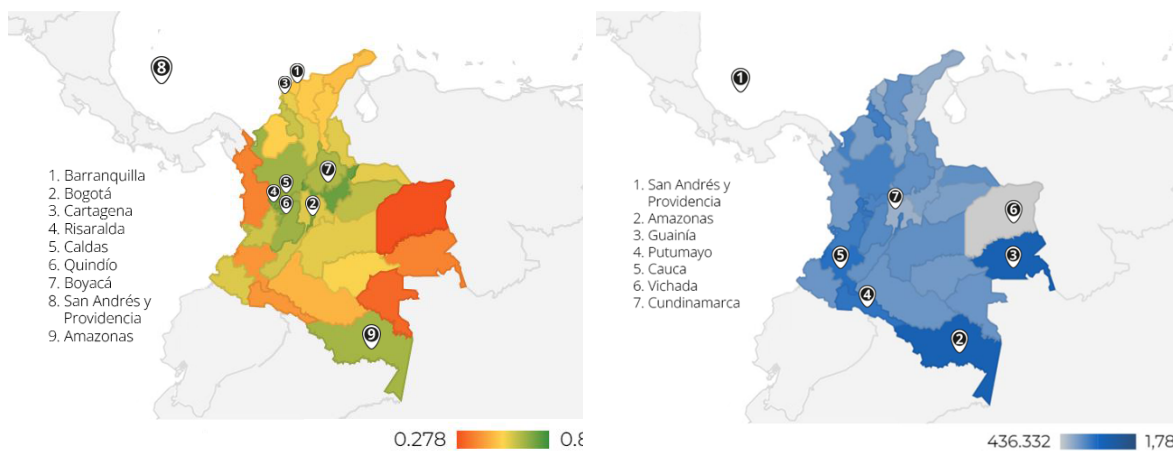

(a) Vaccination progress by territorial entity

(December 31st, 2021)

(b) Inventory levels by territorial entity per

10,000 inhabitants.

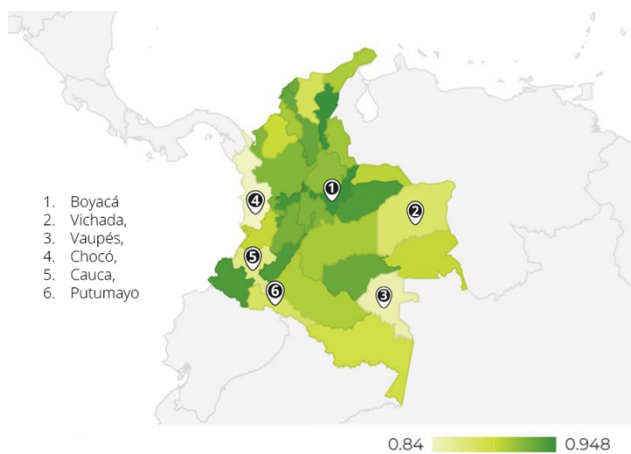

(c) Execution progress (doses administered per doses allocated)

303 Figure 8. Vaccination progress, Inventory levels, and Execution

304

305 Regarding inventories, at the national level, 2021 ended with more than 12M vaccines in stock. San Andrés y

306 Providencia (1,787), Amazonas (1,247), Guainía (1,245), Putumayo (1,012), and Cauca (1,040) were

307 departments with the highest inventories per 10,000 habitants (see Figure 8(b)). At the same time, Vichada

308 and Cundinamarca were the departments with the lowest inventory level, the former due to access  
309 difficulties and the latter due to efficiency in administering the allocated doses.  
310 To estimate the remaining days to achieve the established target and thus herd immunity, the 7-day rolling  
311 average number of doses administered and the 7-day rolling maximum number of doses administered were  
312 used. In both cases and using information from the last week of December (i.e., 24th – 31st), Colombia  
313 would have reached 70% of the vaccinated population by January 21st, 2022. As of December 31st,  
314 territorial entities such as Antioquia, Barranquilla, Boyacá, Caldas, Cartagena, Bogotá, Quindío, Risaralda,  
315 San Andrés y Providencia, and Tolima had already met the goal, while Arauca, Atlántico, Buenaventura,  
316 Caquetá, Cauca, Cesar, Chocó, Córdoba, Cundinamarca, Guainía, Guaviare, La Guajira, Magdalena, Meta,  
317 Putumayo, Vaupés and Vichada would have taken more than three months to reach the goal, indicating the  
318 need to define new vaccination strategies for these territories.

319 Figure 9 shows the vaccine inventory (blue line), doses administered (green line), and doses allocated (green  
320 bars) every week since May 2021. The inventory level was 3M, and by the end of October, the inventory  
321 level reached 12M vaccines. Overall, Figure 9 shows that there was no shortage throughout the year; on the  
322 contrary, in October, inventory exceeded the allocation and administered vaccines.

323

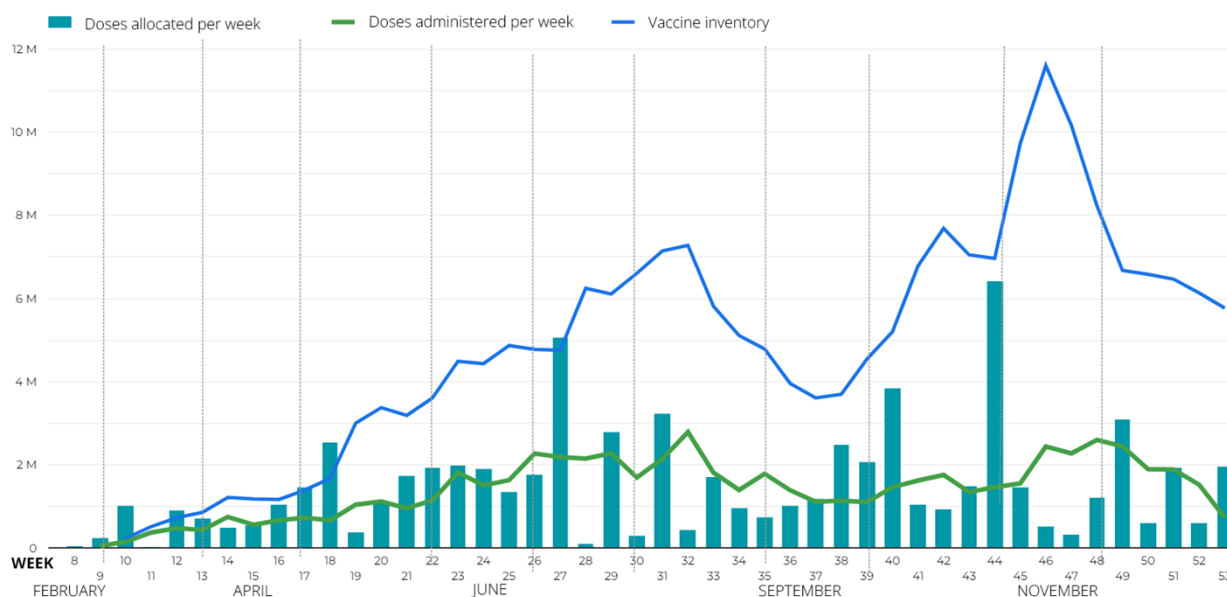

324

325 Figure 9. Inventory levels behavior.

326

327 We also conducted a combined analysis of indicators. To begin with, the progress (a coverage KPI – Figure  
328 8(c)) shows that the most critical finding is that throughout the country, execution levels are high, the lowest  
329 being 84%, understanding the level of execution as the ratio between the vaccines applied over the vaccines  
330 assigned. Combining this result with the epidemiological KPIs (Figure 2), it is possible to monitor the speed  
331 of vaccination (doses administered per 10,000 inhabitants) versus infections and logistic execution (Figure  
332 8(c)). For example, on December 31st, Boyacá presented the highest execution, a high number of doses  
333 administered to its population, and the number of infections was low, indicating that the strategy used to  
334 vaccinate was good. Vaupés, on the other hand, presented a low execution, with a low number of doses  
335 administered, but with few cases; in this department, as mentioned above, it may be necessary to define a  
336 strategy other than mass vaccination. The results presented are discussed in the following section.

337

#### 338 **4. Discussion**

339 The proposed technological KPIs complemented the humanitarian KPIs, allowing for more in-depth  
340 monitoring of the VSC. The set of 38 indicators made it possible to evaluate the effectiveness of the  
341 Colombian Government in the decision-making process and to make recommendations on vaccination  
342 strategies differentiated by territorial entity. Although the progress of vaccination against covid-19 in Latin  
343 America and the Caribbean (LAC) has been uneven concerning reaching the national goal of vaccinating at  
344 least 70% of the population [41], Colombia demonstrated that its health system could respond to massive  
345 vaccination processes, thanks to rapid and dynamic epidemiological and logistic decisions. As illustrated, the  
346 country reached 75% of the vaccinated population with at least one dose, showing a good performance  
347 compared with other LAC countries [34].

348 In particular, the proposed indicators made it possible to trace the assertive epidemiological decisions made  
349 by the Colombian government to achieve the PNV goal, for instance:

350 Study the behavior of specific strategies, such as the blocking vaccination strategy at borders [40] and some  
351 other territorial entities [42, 43]. This strategy was used in March 2021 in Vaupés, Guainía, Amazonas, and  
352 San Andres y Providencia to prevent the entry of the gamma variant to Colombia. The strategy prioritized

353 the allocation of vaccines to these departments and unified the stages of the PNV, giving access to all  
354 qualified persons to be vaccinated. We validated the allocation, distribution, and inventory, with the  
355 proposed KPIs confirming that at least Amazonas and San Andres y Providencia were among the first regions  
356 to meet the goal.

357 Identify and eliminate access barriers. In February, the PNV established that each health insurance company  
358 was responsible for vaccinating its affiliated members. To this end, each company had to contact its  
359 members and inform them of their vaccination appointment (day, time, and vaccination center). This  
360 procedure constituted a barrier to access, and it was quickly eliminated (June, stage 3), effectively increasing  
361 the vaccination rate, as shown in Figure 7.

362 Expand the population eligible for vaccination. In May 2021, the MSPS decided to include the entire  
363 population over 16 years of age [44] as part of the fifth stage. Then, in June, children over 12 years of age  
364 were added to the same stage [45], and finally, in October, regular and irregular migrants [18, 46] and  
365 children over 3 years of age [47] were added. This policy had a positive impact on vaccination progress, as  
366 shown in Figure 5 and Figure 7. During June and July, the used capacity exceeded the required capacity,  
367 indicating that the PNV goal could be reached before December 31st. Although the used capacity was lower  
368 than the required capacity in October, these indicators still improved.

369 Imposing the vaccination card requirement in public spaces (restaurants, movie theaters, and shopping  
370 malls) in November. This policy was effective and helped increase vaccination rates during November,  
371 mainly in large cities such as Bogotá and Barranquilla and departments such as Antioquia. Nevertheless,  
372 were identified some fake cards.

373 On the other hand, logistic decisions such as signing contracts with multiple vaccine suppliers [11], seeking  
374 approval of different vaccines by the National Institute for Drug and Food Surveillance (INVIMA by its name  
375 in Spanish) [48], seeking vaccine donations, continuously promoting the opening of the vaccination centers  
376 [11, 49], and maintaining continuous communication strategies; had a positive effect on the VSC, increasing  
377 the capacities of the system avoiding a massive vaccine shortage.

378 The technological KPIs, particularly the logistic ones, allowed us to identify that the VSC designed for  
379 Colombia had high inventory levels, reaching 12M vaccines by October 2121, which meant that at the end of

380 the year, demand had to be boosted to reach the goal established by the PNV (see Figure 9). Additionally, at  
381 the end of 2021, vaccination progress of 23,8% was identified in rural areas such as Vichada, Vaupés, Chocó,  
382 Cauca, and Putumayo, which also had the lowest allocation progress. On the contrary, in large cities such as  
383 Barranquilla, Bogotá, and Cartagena, both allocation and vaccination improvement were high, reaching  
384 more than 70%. This situation, among others, is due to the lack of indicators to adequately allocate vaccines  
385 and make decisions using other variables such as the vulnerable population or the number of vaccination  
386 centers per 10,000 inhabitants (inventory, capacity, or coverage KPIs).

387 Concerning the allocation KPIs, from Figure 2 is possible to identify that the departments located in the  
388 center of the country have a higher allocation. In contrast, the eastern departments presented the lowest  
389 allocation. This could be explained by the fact that the center of Colombia is the most populated region,  
390 while departments such as Vichada, Guainía, and Vaupés (red on the map) are not. Comparing the two maps  
391 in Figure 2, it is observed that the departments with the highest number of cases are the same ones with the  
392 highest number of doses administered, which is good because it is crucial to be efficient in regions with an  
393 increased number of infections. However, departments such as Vaupés and Vichada, with a low  
394 concentration of cases and the highest percentage of rural population, have the lowest level of doses  
395 administered, indicating the importance of defining different strategies to reach the people in these regions.  
396 Comparing the allocation progress (figure 2(b)), the administration progress (figure 8(a)), and the execution  
397 percentage (Figure 8(c)), it is possible to identify that Vichada, Vaupés, Chocó, Cauca, and Putumayo have  
398 the slowest progress of allocation with a high level of execution (up to 80%). At the same time, these  
399 departments have inventory levels close to 20% of vaccines (see Figure 8(b)) and high levels of rural  
400 populations (see Figure 4), showing the efficiency of the vaccination process in rural territories.

401 According to some studies, the more vaccine supplied, the higher the willingness to be vaccinated [11], and  
402 herd immunity could be achieved quickly. In July, the fifth stage was opened, representing more than 30% of  
403 the qualified population. Consequently, the inventory levels decreased (see Figure 9). However, the  
404 vaccination rate also fell in August due to vaccine shortages. Following this situation, vaccination levels did  
405 not increase as expected, and mandatory vaccination policies had to be implemented to increase willingness



406 to be vaccinated. Governments should ensure better provision in vulnerable areas and deploy extra-mural,  
407 home-based, or itinerant vaccination strategies to achieve better coverage.

408 Colombia's PNV goal was to vaccinate 70% of the population by December 31st. Although this goal was not  
409 met, the designed VSC administered close to 70 million doses in less than a year, compared to the 5 million  
410 vaccines the health system routinely administered, representing a 14-fold increase. This result demonstrates  
411 that the Colombian health system can comply with a massive vaccination plan such as that of covid-19,  
412 supported by its logistics capacity and a flexible and dynamic policy.

413 The more information is open, available, accessible, and captured in real-time, the lower the uncertainty  
414 [13]. In the case of the mass vaccination process in Colombia, access to information could have been more  
415 timely and with different data sources and formats. As a consequence, some of the traditional KPIs of the  
416 VSC could not be included, such as a) the level of compliance with the negotiation (quantities purchased vs.  
417 quantities received, which is part of the supply), b) the wastage of covid-19 vaccines; c) the real-time  
418 capacity of the VSC; d) the real-time inventory per tier; e) the backlog; f) the doses administered in  
419 vulnerable population by age or ethnicity [19]

420

## 421 **5. Conclusion**

422 This research was developed in partnership with local public and private decision-makers, who validated the  
423 different phases of the project as well as the proposed KPIs and results obtained. This kind of collaboration  
424 helped consolidate a dashboard with different perspectives on the progress of the vaccination process in  
425 Colombia and to provide holistic feedback to health system stakeholders.

426 In this paper, we present 38 KPIs for the VSC. These KPIs were classified into eight groups: demographic,  
427 epidemiological, vaccination, supply, and distribution, capacity, coverage, forecasting, and logistics. The first  
428 three groups belong to the humanitarian dimension, and the others to the technological dimension. The  
429 proposal is based on a literature review identifying the need for technological KPIs for CSV before the covid-  
430 19 pandemic. KPIs were used to monitor the NVP in Colombia from February 16th to December 31st, the  
431 time window defined by the Colombian government to meet the goal of fully vaccinating 70% of the  
432 population. The results show that by combining technological KPIs with humanitarian KPIs, a comprehensive

433 understanding of the whole process is achieved, making it possible to evaluate the effect of public health  
434 policies or even anticipate their behavior. During the development of this research, the authors identified  
435 the great need for access to open, standardized, updated, and official information.

436 **Author Contributions:**

437 N. Velasco: Conceptualization, Formal analysis, Methodology, Project Administration, Resources, Validation,  
438 Visualization, Writing—original draft preparation, Writing—review and editing, Supervision

439 A. Herrera: Methodology, Formal analysis, Validation, Visualization, Writing—review, and editing, Supervision

440 J. Trujillo: Data curation, Formal analysis, Software, Investigation, Validation, Visualization.

441 C-A. Amaya: Formal analysis, Validation, Visualization, Writing—review, and editing, Supervision

442 C. Gonzalez-Uribe: Funding acquisition, Formal analysis, Review and editing

443 E. Hernandez: Data curation, Visualization

444 All authors have read and agreed to the published version of the manuscript.

445 **Funding:** The study was funded by A mixed-methods study on the design of AI and data science-based  
446 strategies to inform public health responses to COVID-19 in different local health ecosystems within Colombia  
447 (COLEV) project funded by the International Development Research Centre (IDRC) and the Swedish  
448 International Development Cooperation Agency (SIDA) [109582].

449 **Institutional Review Board Statement:** The study was conducted in accordance with the Declaration of  
450 Helsinki and approved by the Ethics Committee of Universidad de los Andes (Acta: No.1394 – 2021).

451 **Data Availability Statement:** The data will be available in the data repository of the Universidad de los Andes:  
452 [https://papyrus-datos.co/dataverse/uniandes\\_grupo-de-investigacion\\_colev](https://papyrus-datos.co/dataverse/uniandes_grupo-de-investigacion_colev).

453 **Acknowledgments:** This research was developed in partnership with local decision-makers and health  
454 organizations. We thank the Ministry of Health and Social Protection for the interviews to present the  
455 validation results of the logistics monitoring board. We also thank Dr. Gabriel Carrasquilla G., Así Vamos en  
456 Salud (AVS), and the committee of health secretaries.

457 **Conflicts of Interest:** The authors declare no conflicts of interest.

458

459 **Appendix A - Indicators to trace the PNV**

|                                                                                                                                                                                                                                                                                                                                                                                                                                                                                                                                                                                                                                                                                                                                                                                                      |                                                                                                                                                                                                                                                                                                                                                                                                                                                                                                                                                                                                                                                                                                                                                                                                                                                                      |
|------------------------------------------------------------------------------------------------------------------------------------------------------------------------------------------------------------------------------------------------------------------------------------------------------------------------------------------------------------------------------------------------------------------------------------------------------------------------------------------------------------------------------------------------------------------------------------------------------------------------------------------------------------------------------------------------------------------------------------------------------------------------------------------------------|----------------------------------------------------------------------------------------------------------------------------------------------------------------------------------------------------------------------------------------------------------------------------------------------------------------------------------------------------------------------------------------------------------------------------------------------------------------------------------------------------------------------------------------------------------------------------------------------------------------------------------------------------------------------------------------------------------------------------------------------------------------------------------------------------------------------------------------------------------------------|
| <p>Mathematical notation</p> <p><math>i</math>= Colombian territorial entity (where <math>i=1, 2, \dots, 37</math>)</p> <p><math>d</math>=days (where <math>d=1, 2, \dots, 319</math>); vaccination days during 2021 starting on February 17th</p> <p><math>b</math>= brands (where <math>b=1, \dots, 5</math>),</p> <p>Parameters</p> <p>Quantity of vaccine doses allocated (QVAs)</p> <p>Quantity of second doses allocated (QVDAs)</p> <p>Quantity of first doses allocated (QVSAs)</p> <p>Quantity of vaccine doses allocated by brand (<math>CQVAs_b</math>)</p> <p>Quantity of vaccine doses allocated by brand and territorial entity (<math>QVAs_{bi}</math>)</p> <p>Cumulative quantity of first doses allocated (CQVSAs)</p> <p>Quantity of vaccine doses administered per day (QVAp)</p> | <p>Quantity of booster doses administered (QbVAp)</p> <p>7-day rolling average vaccination rate (AVR)*</p> <p>7-day rolling maximum vaccination rate (MVR)*</p> <p>Vaccination centers per territorial entity (Vci)</p> <p>Quantity of vaccines in inventory (QVIn)</p> <p>Days to finish the PNV (Mdf)</p> <p>Covid-19 infections (PICO)</p> <p>Colombian population (CP)</p> <p>Population by territorial entity (<math>P_i</math>)</p> <p>Population by stage and territorial entity (<math>P_{si}</math>)</p> <p>Population with first dose (P1d)</p> <p>Population with second doses (P2d)</p> <p>Population vaccinated with single doses (Pud)</p> <p>Population with a booster dose (Pbd)</p> <p>Qualified population by stage (PeS)</p> <p>Migrant population (Pin)</p> <p>Rural population (RP)</p> <p>Women population (WP)</p> <p>Men population (MP)</p> |
|------------------------------------------------------------------------------------------------------------------------------------------------------------------------------------------------------------------------------------------------------------------------------------------------------------------------------------------------------------------------------------------------------------------------------------------------------------------------------------------------------------------------------------------------------------------------------------------------------------------------------------------------------------------------------------------------------------------------------------------------------------------------------------------------------|----------------------------------------------------------------------------------------------------------------------------------------------------------------------------------------------------------------------------------------------------------------------------------------------------------------------------------------------------------------------------------------------------------------------------------------------------------------------------------------------------------------------------------------------------------------------------------------------------------------------------------------------------------------------------------------------------------------------------------------------------------------------------------------------------------------------------------------------------------------------|

460

| KPI's group                   | Indicator                                                                                   | Mathematical Formula                                                      |
|-------------------------------|---------------------------------------------------------------------------------------------|---------------------------------------------------------------------------|
| (A)<br>Demographic indicators | Percentage of rural population by territorial entity                                        | $\%RP_i = \frac{RP_i}{P_i} \times 100 \quad \forall i = [1, \dots, 37]$   |
|                               | Percentage of women by territorial entity                                                   | $\%WP_i = \frac{WP_i}{P_i} \times 100 \quad \forall i = [1, \dots, 37]$   |
|                               | Percentage of men by territorial entity                                                     | $\%MP_i = \frac{MP_i}{P_i} \times 100 \quad \forall i = [1, \dots, 37]$   |
|                               | Percentage of immigrant population by territorial entity                                    | $\%ImP_i = \frac{Pin_i}{P_i} \times 100 \quad \forall i = [1, \dots, 37]$ |
|                               | Qualified population by stage by vaccination center in each territorial entity ( $PeVp_i$ ) | $PeVp_i = \frac{PS_i}{VC_i} \quad \forall i = [1, \dots, 37]$             |
| (B)<br>Epidemiological        | Covid-19 infection per 10,000                                                               | $PDCo10000 = \frac{PICO}{CP} \times 10000$                                |

| KPI's group                 | Indicator                                                                                 | Mathematical Formula                                                                                                                    |
|-----------------------------|-------------------------------------------------------------------------------------------|-----------------------------------------------------------------------------------------------------------------------------------------|
| indicators by COVID-19      | inhabitants (PDCo10000)                                                                   |                                                                                                                                         |
|                             | Doses administered per 10,000 inhabitants (DAo10000)                                      | $DAo10000 = \frac{COVA_p}{CP} \times 10000$                                                                                             |
| (C) Vaccination             | Cumulative doses administered (CQVA <sub>p</sub> );                                       | $CQVA_p = \sum_{d=1}^m QVA_p$                                                                                                           |
|                             | Cumulative quantity of booster administered (CQbVA <sub>p</sub> )                         | $CQbVA_p = \sum_{d=1}^m QbVA_{p_d}$                                                                                                     |
|                             | Population with one dose (P1d)                                                            | $P1d = CQVA_p - (P2d * 2) - Pud - Pbd$                                                                                                  |
|                             | Population fully vaccinated (PFV = P2d);                                                  | $PFV = \frac{(\sum_{i=1}^{37} CQVA_{p_i} - \sum_{i=1}^{37} CQVSA_{s_i} - \sum_{i=1}^{37} CbVA_{p_1})}{2} + \sum_{i=1}^{37} CQVSA_{s_i}$ |
|                             | Population fully vaccinated by territorial entity (PFV <sub>i</sub> = P2d <sub>i</sub> ); | $PFV_i = \frac{CQVA_{p_i} - CQVSA_{s_i} - CbVA_{p_i}}{2} + CQVSA_{s_i} \forall i = [1, \dots, 37]$                                      |
|                             | Unvaccinated population (UP)                                                              | $UP = (CP * 0,7) - P1d - P2d$                                                                                                           |
|                             | Missing doses (Md), assuming to have at least one dose*                                   | $MP = (((CP * 0,7) - P2d - Pud) * 2) - P1d$                                                                                             |
|                             | Demand for missing doses by territorial entity (DMdi)                                     | $DMd_i = ((CP * 0,7) - PVF) * 2 \forall i = [1, \dots, 37]$                                                                             |
| (D) Supply and distribution | Cumulative quantity of vaccine doses allocated (CQVAs)                                    | $CQVAs = \sum_{d=1}^m QVAs_d$                                                                                                           |
|                             | Allocation progress by territorial entity (AAs <sub>i</sub> )                             | $AAs_i = \frac{CQVSA_{s_i}}{P_i * 70\% * 2} \forall i = [1, \dots, 37]$                                                                 |
|                             | Cumulative number of doses allocated                                                      | $CQVAs_b = \sum_{d=1}^m QVAs_{b_d} \forall b = [1, \dots, 5]$                                                                           |

| KPI's group  | Indicator                                                                                | Mathematical Formula                                                                                                                                               |
|--------------|------------------------------------------------------------------------------------------|--------------------------------------------------------------------------------------------------------------------------------------------------------------------|
|              | by brand<br>( $CQVAs_b$ )                                                                |                                                                                                                                                                    |
|              | Percentage of doses allocated by brand (% $QVAs_b$ )                                     | $\%QVAs_b = \frac{CQVAs_b}{CQVAs} \forall b = [1, \dots, + 5]$                                                                                                     |
|              | Number of doses allocated by brand per 10,000 inhabitants ( $QVAs1000_b$ )               | $QVAs1000_b = \frac{\sum_{i=1}^{37} \sum_{d=1}^{319} \frac{QVDAs_{bid}}{2} + \sum_{i=1}^{37} \sum_{d=1}^{319} QVSA_{bid}}{P_i} * 10.000 \forall b = [1, \dots, 5]$ |
|              | Number of doses allocated per 10,000 inhabitants by territorial entity ( $QVAs10000_i$ ) | $QVAs10000_i = \frac{\sum_{d=1}^{319} \frac{QVDAs_d}{2} + \sum_{d=1}^{319} QVSA_i}{P_i} * 10.000 \forall i = [1, \dots, 37]$                                       |
| (E) Capacity | Vaccination centers per 10,000 inhabitants by territorial entity ( $Vp10000_i$ )         | $Vc10000_i = \frac{Vc_i}{PS_i} * 10.000 \forall i = [1, \dots, 37]$                                                                                                |
|              | Used capacity by territorial entity ( $Uca_i$ )                                          | $Uca_i = \frac{QVA_{p_i}}{Vc_i} \forall i = [1, \dots, 37]$                                                                                                        |
|              | Capacity required by territorial entity ( $Nca_i$ )                                      | $Nca_i = \frac{\frac{DMd_i}{Vc_i}}{Mdf} \forall i = [1, \dots, 37]$                                                                                                |
|              | Installed capacity effectiveness by territorial entity ( $CUL_i$ )                       | $CUL_i = \frac{Uca_i}{Nca_i} \forall i = [1, \dots, 37]$                                                                                                           |
|              | Estimation of the necessary capacity by territorial entity ( $Pnc_i$ )                   | $Pnc_i = \frac{Nca_i}{Uca_i} \forall i = [1, \dots, 37]$                                                                                                           |
| (F) Coverage | Vaccination progress (AV)                                                                | $AV = \frac{\sum_{i=1}^{32} PFV_i}{CP}$                                                                                                                            |
|              | Vaccination progress by territorial entity (AVi)                                         | $AV_i = \frac{PFV_i}{P_i} \forall i = [1, \dots, 37]$                                                                                                              |

| KPI's group           | Indicator                                                                                     | Mathematical Formula                                               |
|-----------------------|-----------------------------------------------------------------------------------------------|--------------------------------------------------------------------|
|                       | Average vaccination progress (AVP)                                                            | $AVP = \left( \frac{P2d + Pud}{CP} \right)$                        |
|                       | Execution progress (EP)                                                                       | $EP = \frac{CQVAp}{CQVAs}$                                         |
|                       | Vaccination rate (VR)                                                                         | $VR = (QVAp)$                                                      |
| (G) Forecasting       | 7-day rolling average number of doses administered (AQVApW)                                   | $AQVApW = \frac{\sum_{d=1}^7 QVAp_d}{7}$                           |
|                       | 7-day rolling maximum number of doses administered (MQVApW)                                   | $MQVApW = \max_{d=[1, \dots, 319]} \{QVAp_{d-6}, \dots, QVAp_d\}$  |
|                       | Days to herd immunity (vaccinating at the 7-day rolling average number of doses administered) | $FAR = \frac{Md}{AVR}$                                             |
|                       | Days to herd immunity (vaccinating at the 7-day rolling maximum number of doses administered) | $FMR = \frac{Md}{MVR}$                                             |
| (H) Logistics metrics | Inventory (I)                                                                                 | $I = CQVAs - CQVAp$                                                |
|                       | Days of inventory (Id)                                                                        | $Id = \frac{I}{AQVApW}$                                            |
|                       | Inventory by territorial entity per 10,000 inhabitants (Ite10000 <sub>i</sub> )               | $Ite10000_i = \frac{I_i}{P_i} * 10.000 \forall i = [1, \dots, 37]$ |

461  
462

## 463 Appendix B - Snowflake dashboard data model

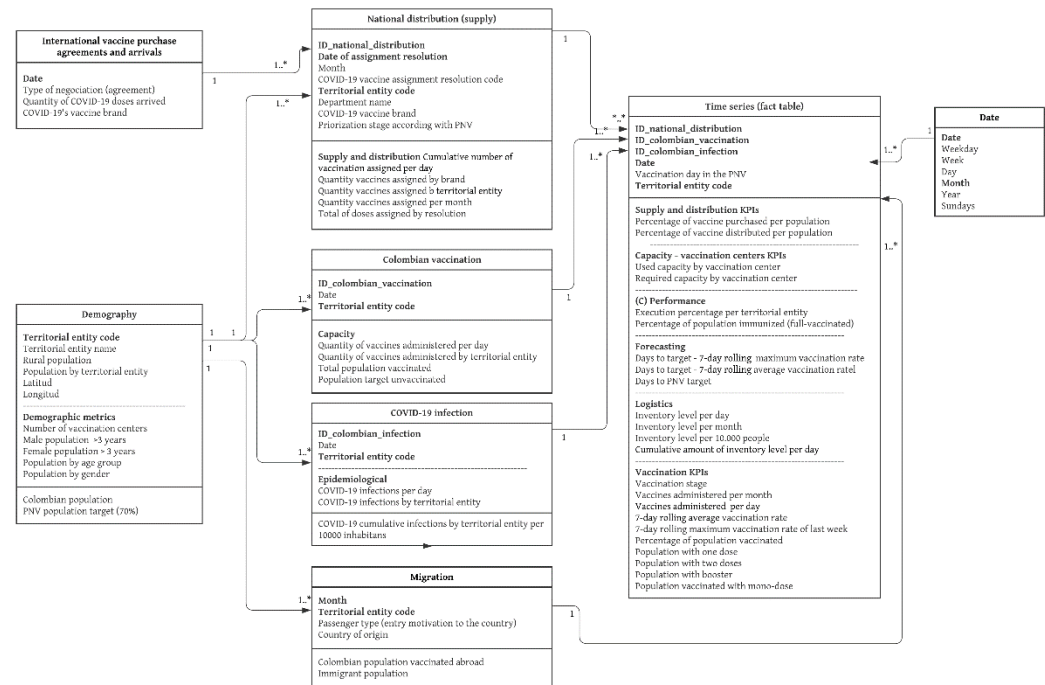

464

## 465 References

466

- 467 1. de Carvalho, M.I., D. Ribeiro, and A.P. Barbosa-Povoa, *Design and Planning of Sustainable Vaccine Supply*  
468 *Chain*, in *Pharmaceutical Supply Chains - Medicines Shortages*, A.P. Barbosa-Povoa, H. Jenzer, and J.L. de  
469 de Miranda, Editors. 2019, Springer International Publishing: Cham. p. 23-55.
- 470 2. Lemmens, S., et al., *The Integration of a Flow Model into a Stakeholder-Based Framework for Vaccine Supply*  
471 *Chain Design*, in *Pharmaceutical Supply Chains - Medicines Shortages*, A.P. Barbosa-Povoa, H. Jenzer, and  
472 J.L. de Miranda, Editors. 2019, Springer International Publishing: Cham. p. 193-201.
- 473 3. Duijzer, L.E., W. van Jaarsveld, and R. Dekker, *Literature review: The vaccine supply chain*. European  
474 Journal of Operational Research, 2018. **268**(1): p. 174-192.
- 475 4. Shah, N., *Process industry supply chains: Advances and challenges*. Computers & Chemical Engineering,  
476 2005. **29**(6): p. 1225-1235.
- 477 5. (IFPMA), I.F.o.P.M.A., *The Complex Journey of a Vaccine: the Steps Behind Developing a New Vaccine*. 2019,  
478 IFPMA Geneva.
- 479 6. Zaffran, M., et al., *The imperative for stronger vaccine supply and logistics systems*. Vaccine, 2013. **31**: p. B73-  
480 B80.
- 481 7. Georgiadis, G.P. and M.C. Georgiadis, *Optimal planning of the COVID-19 vaccine supply chain*. Vaccine,  
482 2021. **39**(37): p. 5302-5312.
- 483 8. Lemmens, S., et al., *A review of integrated supply chain network design models: Key issues for vaccine supply*  
484 *chains*. Chemical Engineering Research and Design, 2016. **109**: p. 366-384.
- 485 9. Xue, M., *Visualization of the distribution of COVID-19 vaccines in Norway*. 2021, Høgskolen i Molde-  
486 Vitenskapelig høgskole i logistikk.
- 487 10. Mentzer, J.T., et al., *Defining Supply Chain Management*. Journal of Business Logistics, 2001. **22**(2): p. 1-  
488 25.
- 489 11. Cuschieri, S., et al., *The fastest national COVID vaccination in Europe - Malta's strategies*. Health Sciences  
490 Review, 2021. **1**: p. 100001.

- 491 12. Shahparvari, S., et al., *A decision support system for prioritised COVID-19 two-dosage vaccination allocation*  
492 *and distribution*. Transportation Research Part E: Logistics and Transportation Review, 2022. **159**: p.  
493 102598.
- 494 13. Kus, K., et al. *Vaccination Dashboard Development during COVID-19: A Design Science Research Approach*.  
495 in *Wirtschaftsinformatik 2022 Proceedings*. 2022.
- 496 14. Goel, R.K., J.W. Saunoris, and S.S. Goel, *Supply chain performance and economic growth: The impact of*  
497 *COVID-19 disruptions*. Journal of Policy Modeling, 2021. **43**(2): p. 298-316.
- 498 15. Chen, X., et al., *Allocation of COVID-19 Vaccines Under Limited Supply*. medRxiv, 2020: p.  
499 2020.08.23.20179820.
- 500 16. Shittu, E., et al., *Reorganizing Nigeria's Vaccine Supply Chain Reduces Need For Additional Storage Facilities,*  
501 *But More Storage Is Required*. Health Affairs, 2016. **35**(2): p. 293-300.
- 502 17. Trujillo-Diaz, J., et al., *Tracing and measuring the COVID-19 Colombian vaccination network*. IFAC-  
503 PapersOnLine, 2022. **55**(10): p. 3124-3129.
- 504 18. Ministerio de Salud y Protección Social, *Resolución 1627 de 2021*. . 2021.
- 505 19. Berry, I., et al., *A sub-national real-time epidemiological and vaccination database for the COVID-19 pandemic*  
506 *in Canada*. Scientific Data, 2021. **8**(1): p. 173.
- 507 20. Mitra, A., B. Soman, and G. Singh, *An Interactive Dashboard for Real-Time Analytics and Monitoring of*  
508 *COVID-19 Outbreak in India: A proof of Concept*. arXiv preprint arXiv:2108.09937, 2021.
- 509 21. Bae, J., et al., *Mobile apps prioritizing privacy, efficiency and equity: A decentralized approach to covid-19*  
510 *vaccination coordination*. arXiv preprint arXiv:2102.09372, 2021.
- 511 22. de Moura Pereira, D.A., M. dos Santos, and D. de Oliveira Costa, *Análise da distribuição de vacinas contra*  
512 *o covid-19 no Cariri Paraibano a partir do desenvolvimento de um dashboard em power BI*. Archives of Health,  
513 2021. **2**(3): p. 430-441.
- 514 23. Australian Government Operation COVID Shield. *COVID-19 Vaccine Roll-out*. 2021 [cited 2021 30  
515 September]; Available from: [https://www.health.gov.au/sites/default/files/documents/2021/09/covid-](https://www.health.gov.au/sites/default/files/documents/2021/09/covid-19-vaccine-rollout-update-30-september-2021.pdf)  
516 [19-vaccine-rollout-update-30-september-2021.pdf](https://www.health.gov.au/sites/default/files/documents/2021/09/covid-19-vaccine-rollout-update-30-september-2021.pdf).
- 517 24. Ministry of Health and Family Welfare. *Co-win Winning Over COVID-19*. 2021 [cited 2021 30 September];  
518 Available from: <https://dashboard.cowin.gov.in/>.
- 519 25. Coconino County Arizona. *Vaccine and Case Data*. 2021 [cited 2021 30 September]; Available from:  
520 <https://www.coconino.az.gov/2598/Vaccine-Data-Dashboard>.
- 521 26. Ministerio de Salud y Protección Social, *Llegadas de vacunas por laboratorio y dosis aplicadas por entidad*  
522 *territorial*, in *Daily*. 2021.
- 523 27. Ministerio de Salud y Protección Social, *Normativa resoluciones - Año: 2021*. 2021.
- 524 28. Ministerio de Salud y Protección Social, *Asignación de dosis de vacuna contra COVID-19*, in *Weekly*. 2021.
- 525 29. Ministerio de Salud y Protección Social, *Infografía Plan Nacional de Vacunación (PNV) contra COVID-19*.  
526 2021.
- 527 30. Departamento Nacional de Planeación, *Flujos migratorios*, in *Monthly*. 2021.
- 528 31. Departamento Nacional de Planeación, *Estatuto Temporal de Protección para Migrantes Venezolanos*, in  
529 *Monthly*. 2021.
- 530 32. Ministerio de Salud y Protección Social, *Cantidad de prestadores con puntos de vacunación*, in *Once*. 2021.
- 531 33. Estadística, D.A.N.d., *Proyecciones y retroproyecciones de población departamental para el periodo 1985-2017*  
532 *y 2018-2050 con base en el CNPV 2018*. 2018.
- 533 34. Global Change Data Lab, *Coronavirus (COVID-19) Vaccinations*, in *Daily*. 2021.
- 534 35. Niño-Machado, N.G.-M., María; González-Uribe, Catalina, *Mapa de actores relacionados con el sector salud*  
535 *involucrados en la respuesta a la pandemia por COVID-19 en Colombia (2020-2021)*. 2022.
- 536 36. Levene, M. and G. Loizou, *Why is the snowflake schema a good data warehouse design?* Information Systems,  
537 2003. **28**(3): p. 225-240.
- 538 37. COLEV, *Resultados: COLEV en acción*. 2021.
- 539 38. COLEV. *Conclusiones sobre el desempeño del plan nacional de vacunación (PNV) contra covid-19 en Colombia*.  
540 2021; Available from: [https://colev.uniandes.edu.co/2-uncategorised/58-avance-nacional-de-](https://colev.uniandes.edu.co/2-uncategorised/58-avance-nacional-de-vacunacion)  
541 [vacunacion](https://colev.uniandes.edu.co/2-uncategorised/58-avance-nacional-de-vacunacion).
- 542 39. Ministerio de Salud y Protección Social, *Resolución 362 de 2021- Por la cual se unifican las fases y etapas del*  
543 *Plan Nacional de Vacunación (PNV) contra la COVID-19*. 2021.



- 544 40. Ministerio de Salud y Protección Social, *Resolución 194 de 2021 - Por la cual se unifican las fases y etapas del*  
545 *Plan Nacional de Vacunación (PNV) contra el COVID-19 en los municipios de Leticia, Puerto Nariño, Mitú e*  
546 *Inírida*. 2021.
- 547 41. Dreser, A., *Retos y avances en la vacunación contra COVID-19 en Latinoamérica y el Caribe*. Revista de la  
548 Universidad Industrial de Santander. Salud, 2021. **53**.
- 549 42. Ministerio de Salud y Protección Social, *Resolución 965 de 2021 - Por la cual se modifica el artículo 1 de la*  
550 *resolución 802 de 2021*. 2021.
- 551 43. Ministerio de Salud y Protección Social, *Resolución 802 de 2021 - Por la cual se unifican las fases y etapas en*  
552 *las que trate el artículo 2 del Decreto 109 de 2021, modificado por los decretos 466 y 630 de 2021, en 40 municipios*  
553 *y un distrito del territorio nacional*. . 2021.
- 554 44. Ministerio de Salud y Protección Social, *Decreto 466 de 2021 - Por el cual se modifica el Decreto 109 de 2021,*  
555 *modificado por el Decreto 0404 de 2021 y se dictan otras disposiciones*. . 2021.
- 556 45. Ministerio de Salud y Protección Social, *Decreto 630 de 2021 - Por el cual se modifica el Decreto 109 de 2021,*  
557 *modificado por el artículo 1 del decreto 466 de 2021 y se dictan otras disposiciones*. . 2021.
- 558 46. Ministerio de Salud y Protección Social, *Decreto 1671 de 2021*. 2021.
- 559 47. MSPS. *Resolución No. 1738 de 2021*. 2021 October 29th, 2021 [cited 2021 December 31st]; Available from:  
560 [https://www.minsalud.gov.co/Normatividad\\_Nuevo/Resoluci%C3%B3n%20No.%201738%20de%202021.pdf](https://www.minsalud.gov.co/Normatividad_Nuevo/Resoluci%C3%B3n%20No.%201738%20de%202021.pdf).  
561
- 562 48. Ministerio de Salud y Protección Social Colombia *adquirió 40 millones de dosis de vacunas contra el covid-*  
563 *19*. 2020.
- 564 49. Ministerio de Salud y Protección Social, *Puntos habilitados para vacunación contra la COVID-19*. 2021.  
565

Table 1. Indicators published in dashboards and articles.

---

KPI

---

Doses administered per date and vaccine manufacturer [13]

Cumulative vaccine distributed by province and similar [26-28]

Deliveries by the manufacturer [13]

Doses available per manufacturer and similar [13]

Vaccination centers [27]

Percentage of people vaccinated [28]

Total number of vaccine doses administered [28]

medRxiv preprint doi: <https://doi.org/10.1101/2023.02.23.23286347>; this version posted February 23, 2023. The copyright holder for this preprint (which was not certified by peer review) is the author/funder, who has granted medRxiv a license to display the preprint in perpetuity. It is made available under a CC-BY 4.0 International license.

7-day rolling average of doses administered [19]

Time to herd immunity [13]

Deaths avoided [13]

People fully vaccinated

People vaccinated by region [26, 27]

People vaccinated with first and second doses [13, 26-28]

Number doses administered per period (Daily/Weekly/Monthly) [13, 26]

People vaccinated/Coverage by age group [13, 19, 26]

People vaccinated by gender and similar [13, 19, 26-28]

Vaccination in rural regions behaviors [27]

Doses administered per race and ethnicity and similar [26]

Vulnerable population vaccinated [26]

---

Table 1. Structured and unstructured data sources

| Data source                                                               | Periodicity                              | Source description                                                                                                          | Data                                                                                                                                                                                                                                                       |
|---------------------------------------------------------------------------|------------------------------------------|-----------------------------------------------------------------------------------------------------------------------------|------------------------------------------------------------------------------------------------------------------------------------------------------------------------------------------------------------------------------------------------------------|
| 1. Vaccine purchase agreements and information on arrivals in the country | According to the periodicity of arrivals | Structured open online spreadsheet [29] and unstructured official information from Twitter.                                 | <ul style="list-style-type: none"> <li>- Date</li> <li>- Type of agreement</li> <li>- Number of doses arrived per manufacturer</li> <li>- National distribution resolution ID</li> <li>- Date of allocation resolution Month</li> </ul>                    |
| 2. Vaccine allocation resolutions by territorial entities (supply)        | Weekly                                   | Unstructured information on government resolutions in PDF format [30] and structured open information in JSON format [31]   | <ul style="list-style-type: none"> <li>- Vaccine allocation resolution number</li> <li>- Territorial entity code</li> <li>- Department name</li> <li>- Vaccine manufacturer</li> <li>- Description of prioritization stage according to the PNV</li> </ul> |
| 3. Infographics on the progress of the PNV                                | Daily                                    | Unstructured data on the progress of vaccination by the territorial entity, by dose, and total population (PNG format) [32] | <ul style="list-style-type: none"> <li>- Number of doses administered per day</li> <li>- Number of doses administered per territorial entity</li> </ul>                                                                                                    |

medRxiv preprint doi: <https://doi.org/10.1101/2023.02.23.23286347>; this version posted February 23, 2023. The copyright holder for this preprint (which was not certified by peer review) is the author/funder, who has granted medRxiv a license to display the preprint in perpetuity. It is made available under a [CC-BY 4.0 International license](https://creativecommons.org/licenses/by/4.0/).

---

|                                            |         |                                                                             |                                                                                                                                                                                                                                                |
|--------------------------------------------|---------|-----------------------------------------------------------------------------|------------------------------------------------------------------------------------------------------------------------------------------------------------------------------------------------------------------------------------------------|
| 4. Regional report on vaccination progress | Daily   | Structured open Google sheets [29]                                          | <ul style="list-style-type: none"> <li>- Total vaccinated population</li> <li>- Total non-vaccinated population</li> <li>- Month</li> </ul>                                                                                                    |
| 5. Migratory flows and immigration         | Monthly | Structured data filtered from Tableau [33, 34]                              | <ul style="list-style-type: none"> <li>- Territorial entity code</li> <li>- Type of passenger (motivation for entering the country)</li> <li>- Country of departure</li> </ul>                                                                 |
| 6. Vaccination centers                     | Once    | Structured open spreadsheet [35]                                            | <ul style="list-style-type: none"> <li>- Number</li> <li>- Location</li> </ul>                                                                                                                                                                 |
| 7. Demography                              | Once    | Structured open spreadsheet [36]                                            | <ul style="list-style-type: none"> <li>- Territorial entity code</li> <li>- Territorial entity name</li> <li>- Rural and dispersed population</li> <li>- Population per territorial entity</li> <li>- Latitude</li> <li>- Longitude</li> </ul> |
| 8. Infection                               | Daily   | Structured open online database using JSON format filtered by Colombia [37] | <ul style="list-style-type: none"> <li>- Colombian infection ID</li> <li>- Date</li> <li>- Territorial entity code</li> </ul>                                                                                                                  |

---

medRxiv preprint doi: <https://doi.org/10.1101/2023.02.23.23286347>; this version posted February 23, 2023. The copyright holder for this preprint (which was not certified by peer review) is the author/funder, who has granted medRxiv a license to display the preprint in perpetuity. It is made available under a [CC-BY 4.0 International license](https://creativecommons.org/licenses/by/4.0/).

Table 1. Indicators designed and validated through iterations.

| KPI Dimension   | KPI                                    | Taken/Adapted from literature                              | Proposed                                                                                    |
|-----------------|----------------------------------------|------------------------------------------------------------|---------------------------------------------------------------------------------------------|
| Humanitarian    | (A) Demographic                        | Percentage of rural population by territorial entity       | Percentage of immigrant population by territorial entity                                    |
|                 |                                        | Percentage of women by territorial entity                  | Qualified population by stage by vaccination center in each territorial entity ( $PeVp_i$ ) |
|                 | (B) Epidemiological                    | Percentage of men by territorial entity                    | Covid-19 infection per 10,000 inhabitants (PDCo10000)                                       |
|                 |                                        |                                                            | Doses administered per 10,000 inhabitants (DAo10000)                                        |
| (C) Vaccination | Cumulative doses administered (CQVAp)  |                                                            | Population fully vaccinated by territorial entity ( $PFV_i = P2d_i$ )                       |
|                 |                                        | Cumulative quantity of booster doses administered (CQbVAp) | Unvaccinated population (UP)                                                                |
|                 | Population with one dose (P1d)         | Missing doses (Md), assuming to have at least one dose     |                                                                                             |
|                 | Population fully vaccinated (PFV =P2d) | Demand for missing doses by territorial entity (DMdi)      |                                                                                             |
| Technological   | (D) Supply and distribution            | Cumulative quantity of vaccine doses allocated (CQVAs)     |                                                                                             |
|                 |                                        | Allocation progress by territorial entity ( $AA_s_i$ )     |                                                                                             |

medRxiv preprint doi: <https://doi.org/10.1101/2023.02.23.23286347>; this version posted February 23, 2023. The copyright holder for this preprint (which was not certified by peer review) is the author/funder, who has granted medRxiv a license to display the preprint in perpetuity. It is made available under a CC-BY 4.0 International license.

---

Cumulative number of doses allocated by  
brand ( $CQVAs_b$ )

Percentage of doses allocated by brand (%)  
 $QVAs_b$ )

Number of doses allocated by brand per  
10,000 inhabitants ( $QVAs1000_b$ )

Number of doses allocated per 10,000  
inhabitants by territorial entity  
( $QVAs10000_i$ )

medRxiv preprint doi: <https://doi.org/10.1101/2023.02.23.23286347>; this version posted February 23, 2023. The copyright holder for this preprint  
(which was not certified by peer review) is the author/funder, who has granted medRxiv a license to display the preprint in perpetuity.  
It is made available under a [CC-BY 4.0 International license](https://creativecommons.org/licenses/by/4.0/).

**(E) Capacity**

Vaccination centers per 10,000 inhabitants  
by territorial entity ( $Vc10000_i$ )

Used capacity by territorial entity ( $UCa_i$ )

Capacity required by territorial entity  
( $NCa_i$ )

Installed capacity effectiveness by  
territorial entity ( $CUL_i$ )

Estimation of the necessary capacity by  
territorial entity ( $Pnc_i$ )

**(F) Coverage**

Vaccination progress (AV)

Vaccination progress by territorial entity  
( $AV_i$ )

Average vaccination progress (AVP)

Execution progress (EP)

Vaccination rate (VR)

**(G) Forecasting**

7-day rolling average number of doses  
administered ( $AQVApW$ )

---

---

7-day rolling maximum number of doses

administered (MQVApW)

Days to herd immunity (vaccinating at the

7-day rolling average number of doses

administered)

Days to herd immunity (vaccinating at the

7-day rolling maximum number of doses

administered)

medRxiv preprint doi: <https://doi.org/10.1101/2023.02.23.23286347>; this version posted February 23, 2023. The copyright holder for this preprint (which was not certified by peer review) is the author/funder, who has granted medRxiv a license to display the preprint in perpetuity. It is made available under a [CC-BY 4.0 International license](https://creativecommons.org/licenses/by/4.0/).

**(H) Logistics**

**Inventory (I)**

Days of inventory (Id)

Inventory by territorial entity per 10,000

inhabitants (*Ite10000<sub>i</sub>*)

---

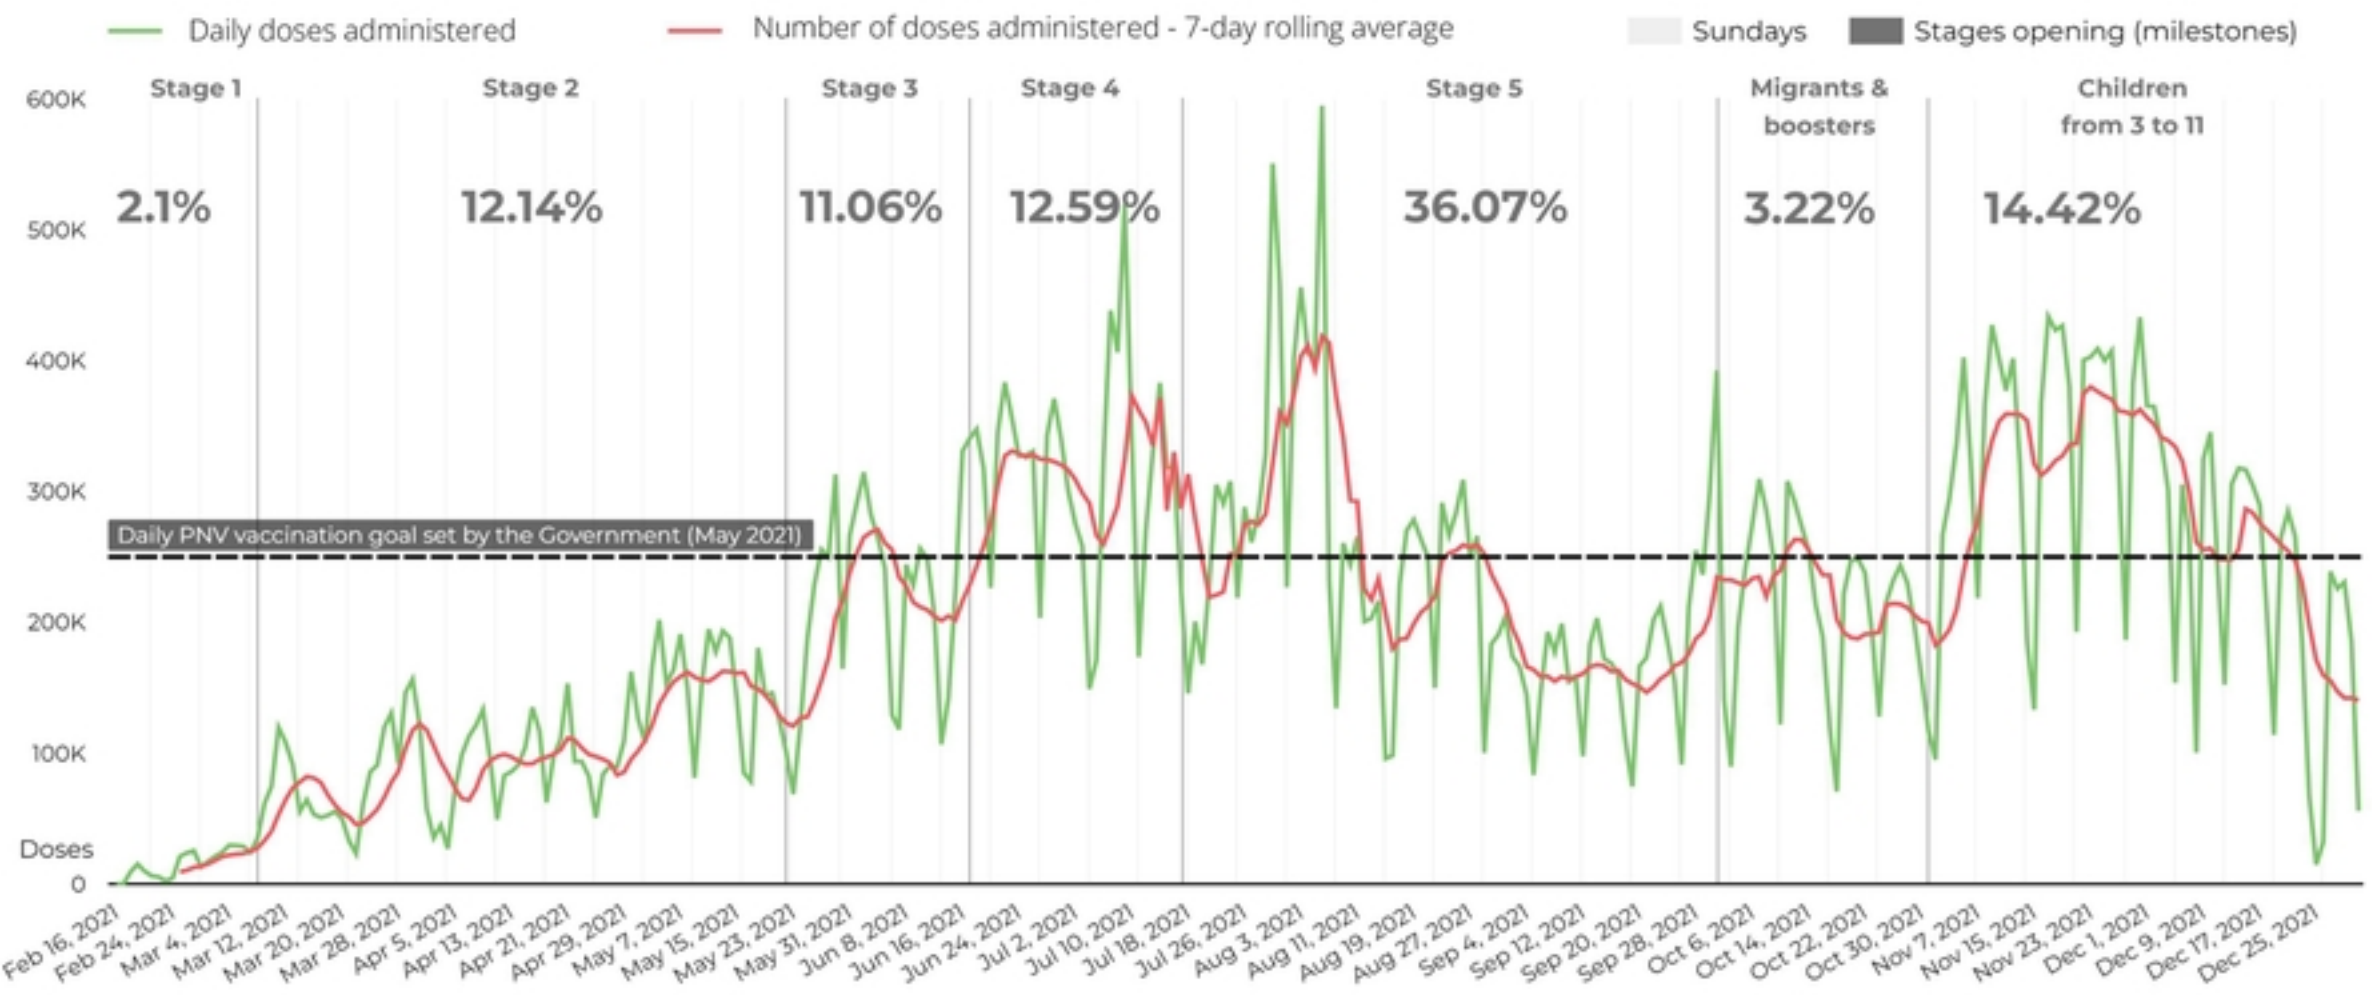

Figure 7



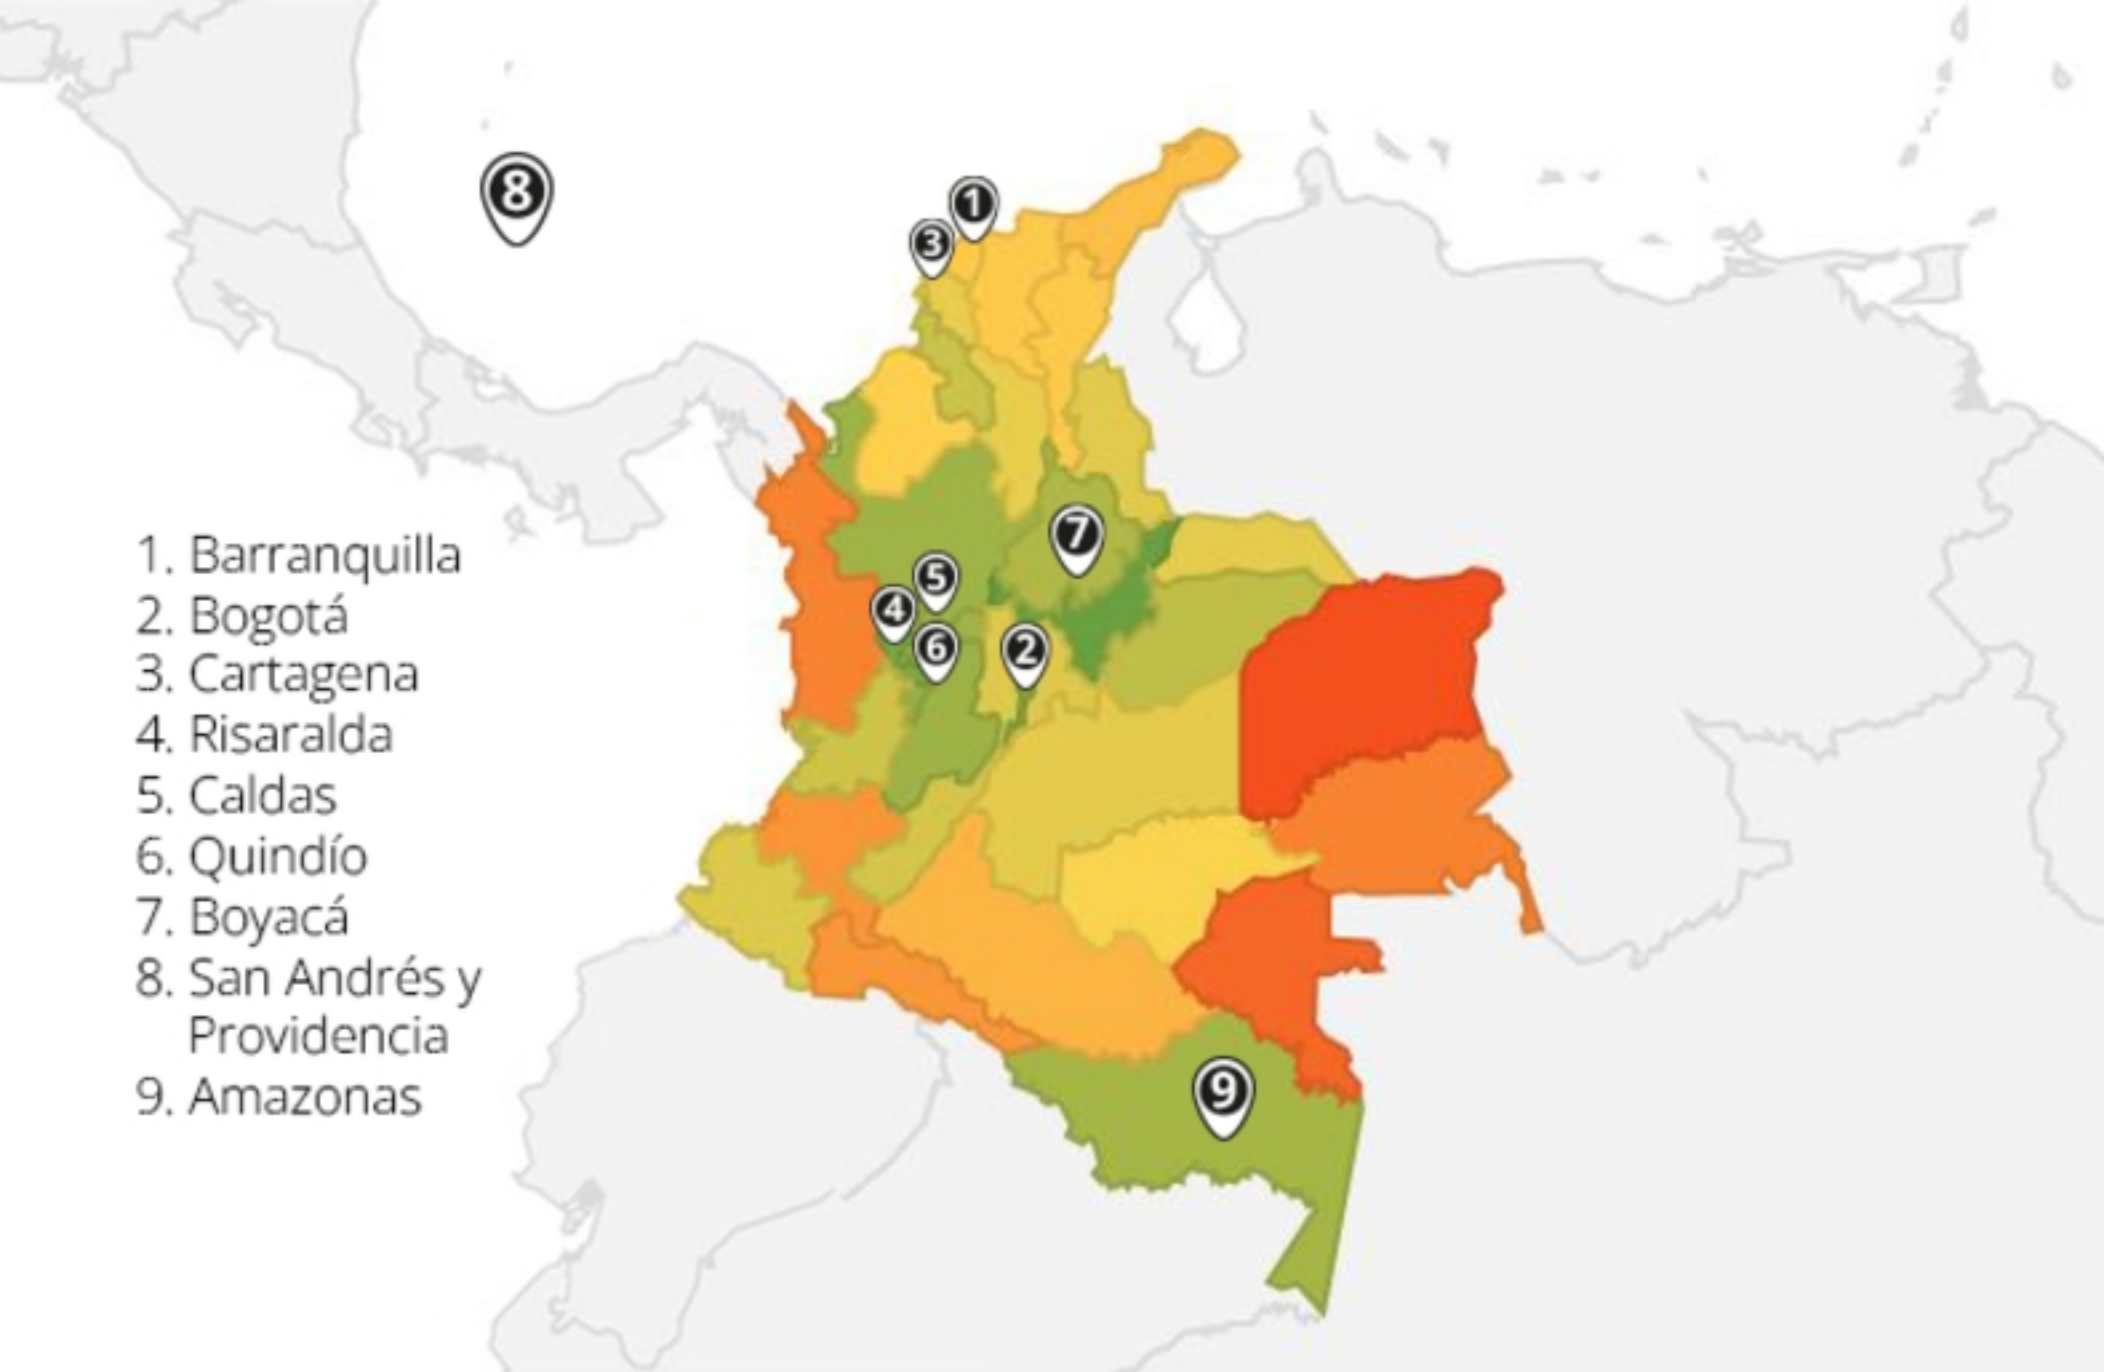

0.278  0.854

Figure 8a

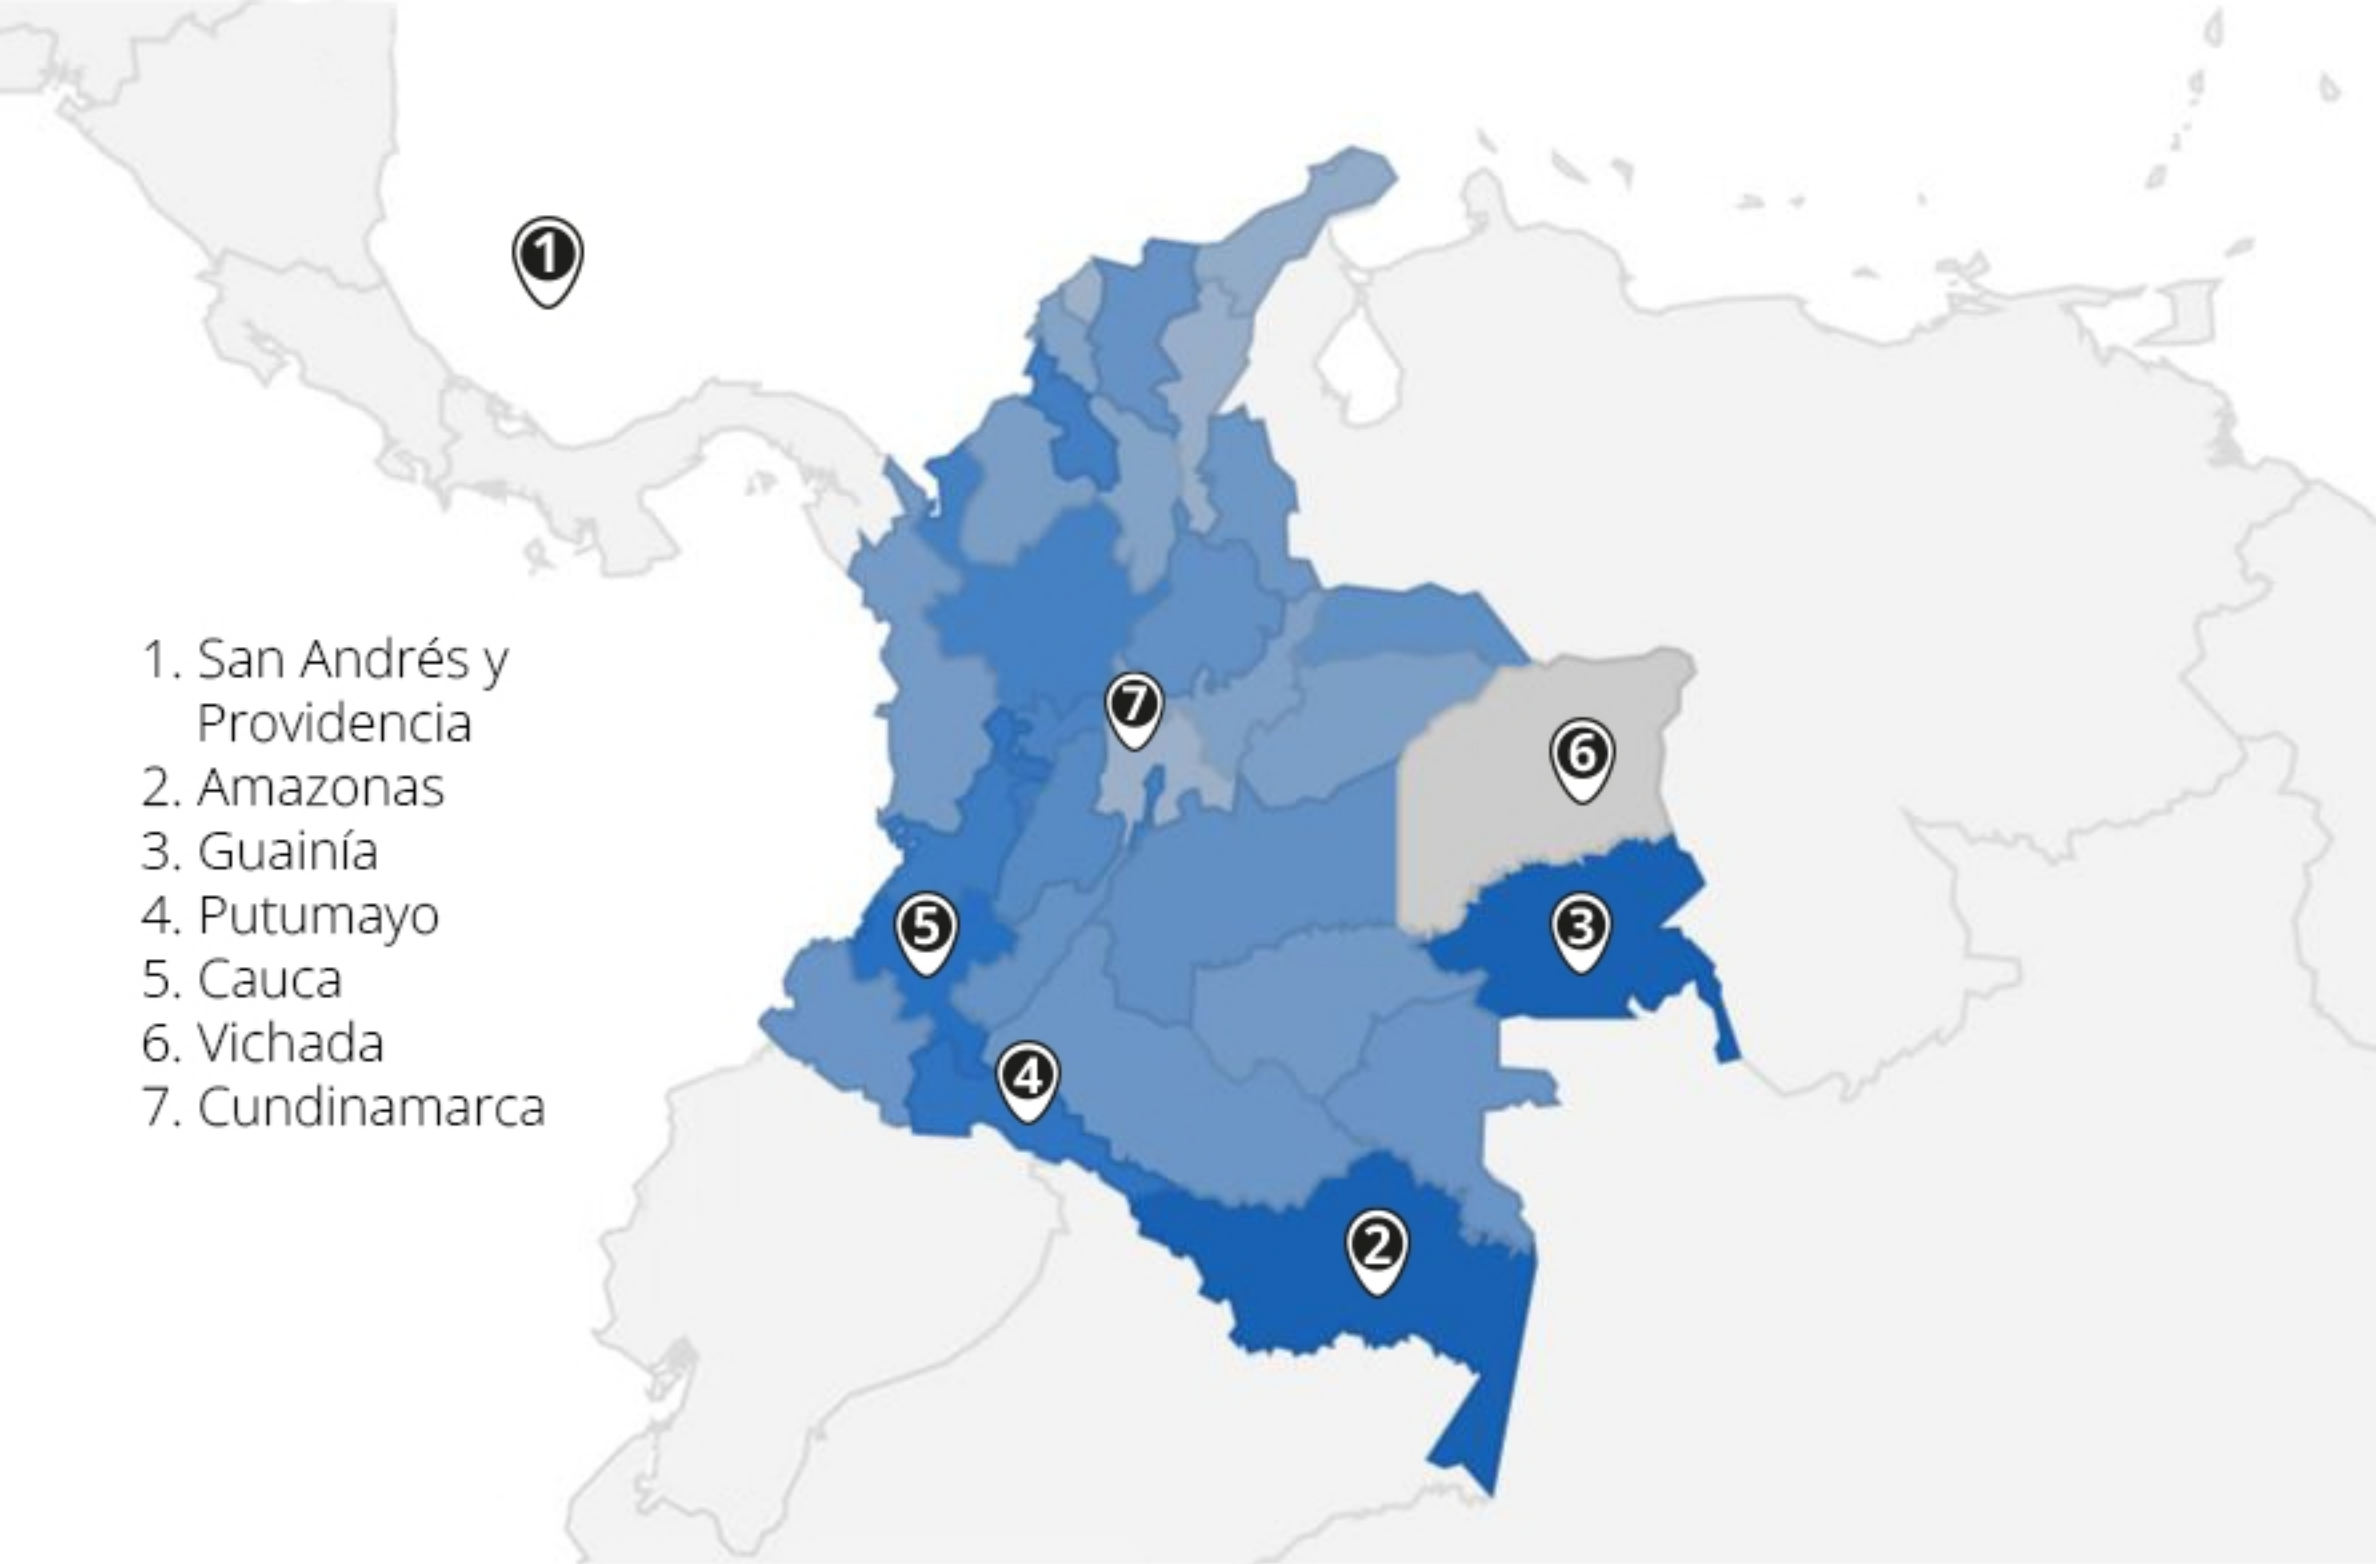

- 1. San Andrés y Providencia
- 2. Amazonas
- 3. Guainía
- 4. Putumayo
- 5. Cauca
- 6. Vichada
- 7. Cundinamarca

436.332 1,786.74

Figure 8b

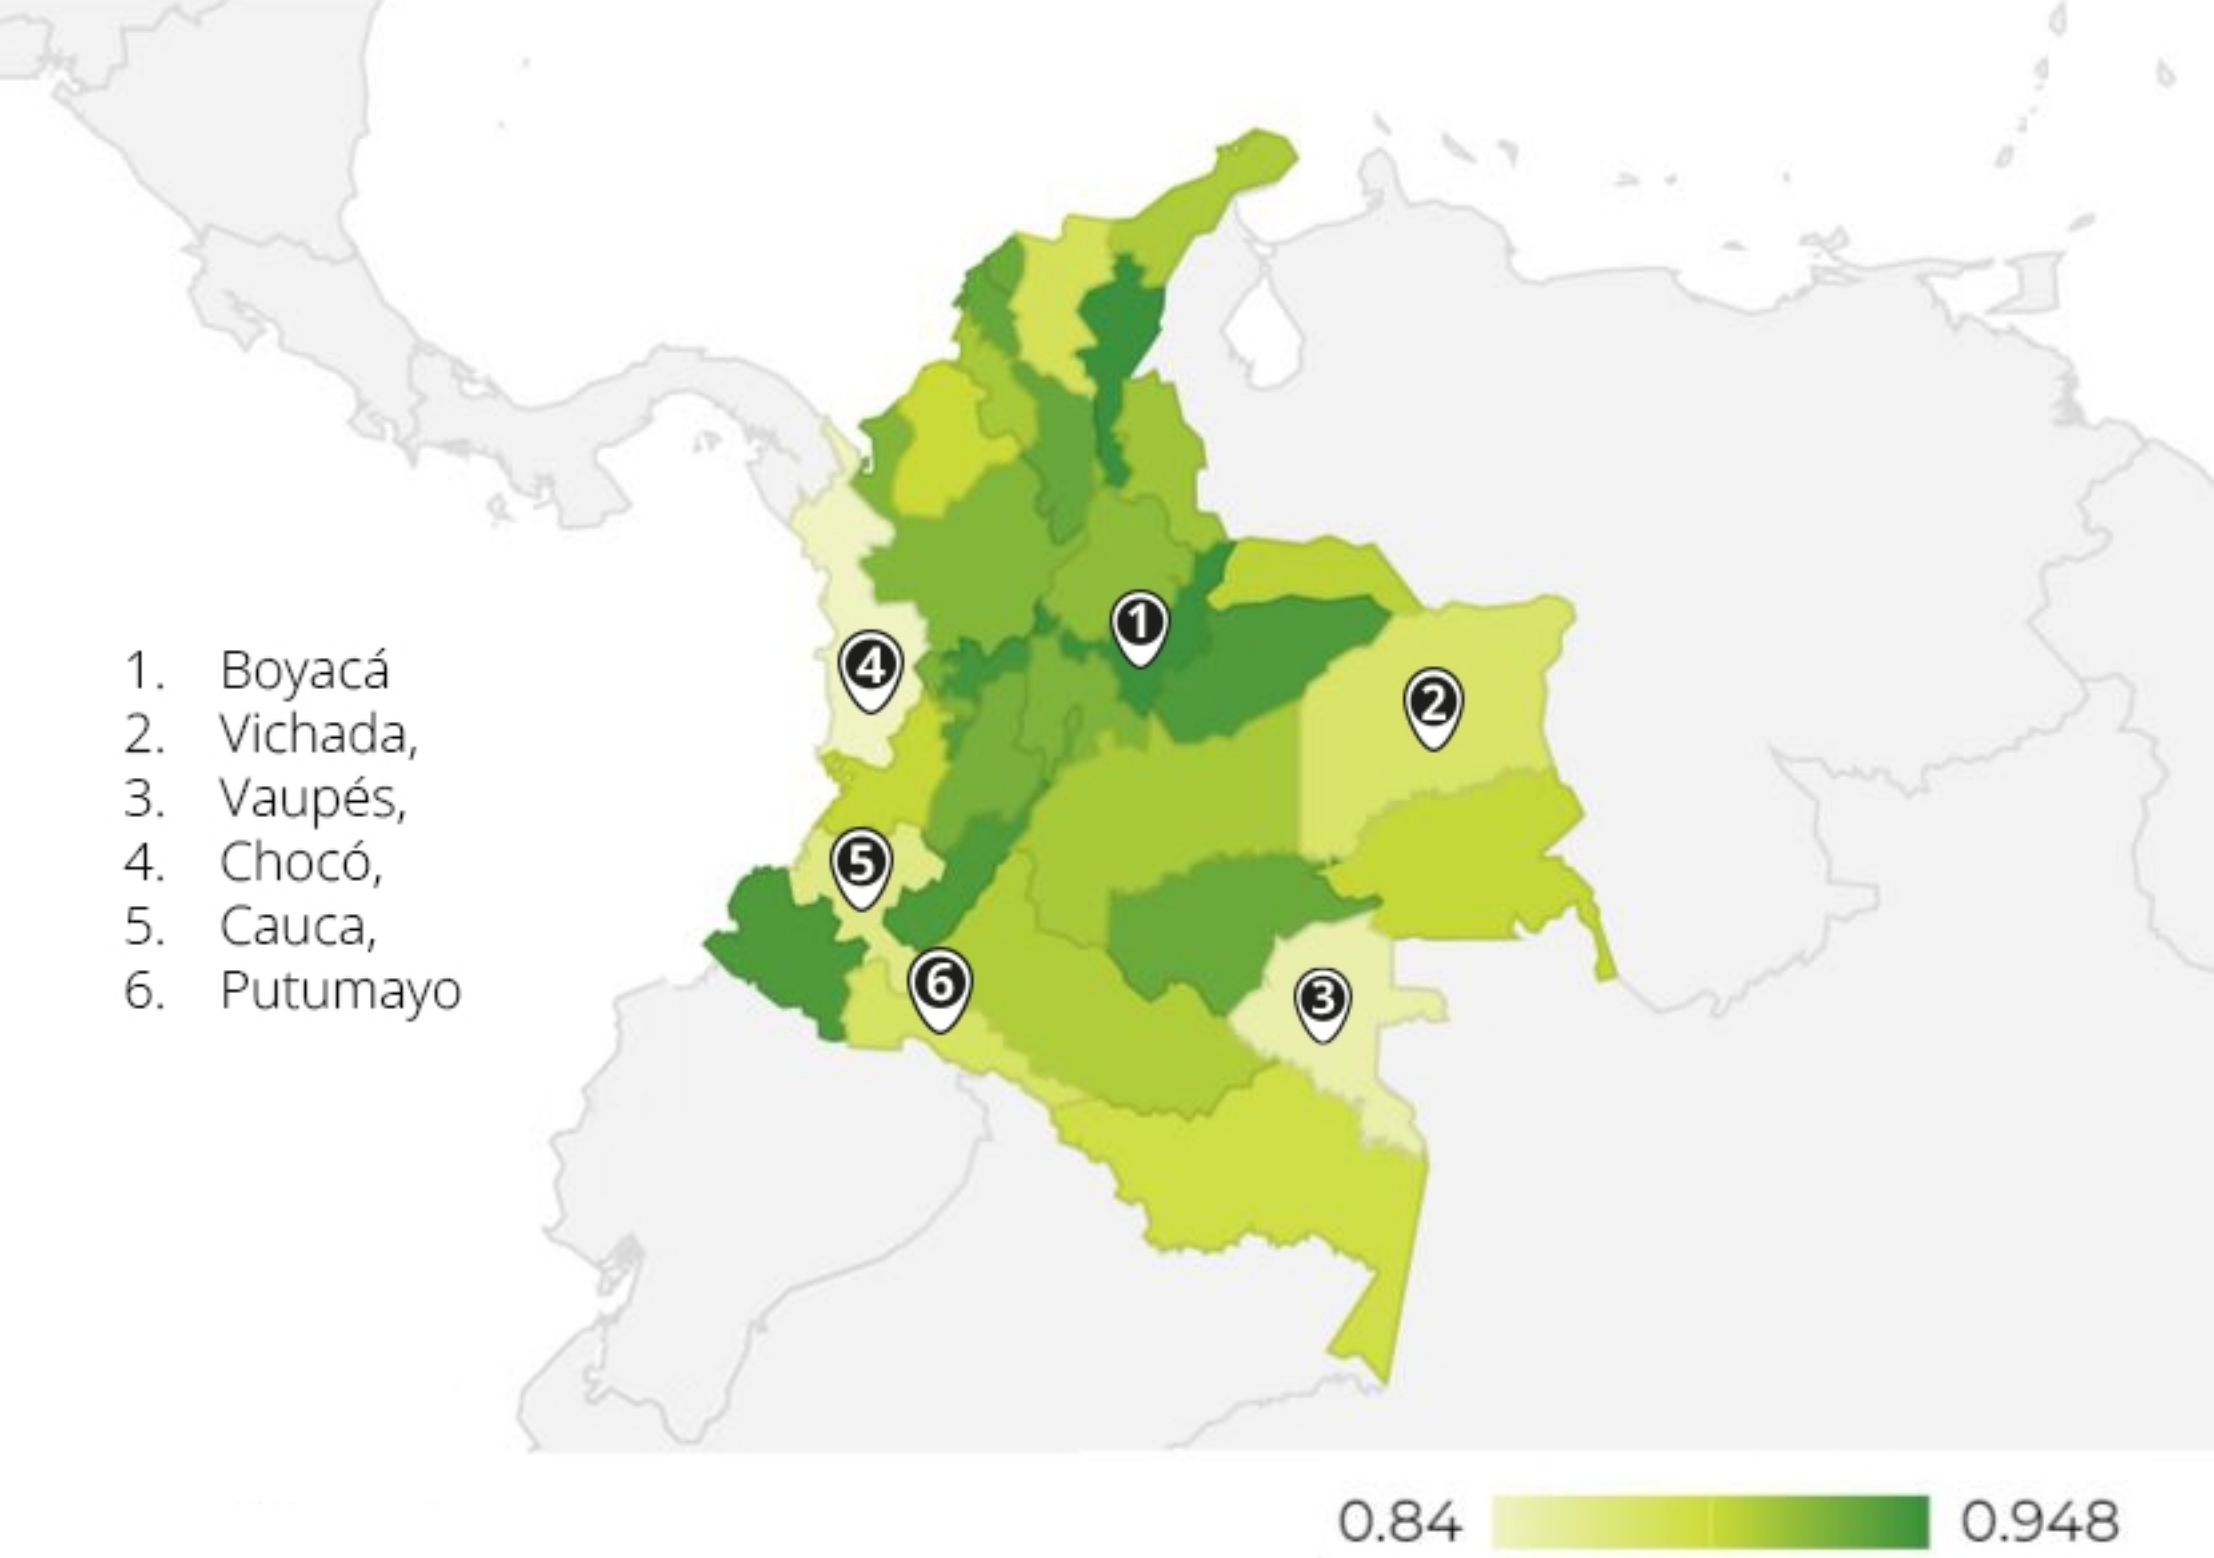

Figure 8c

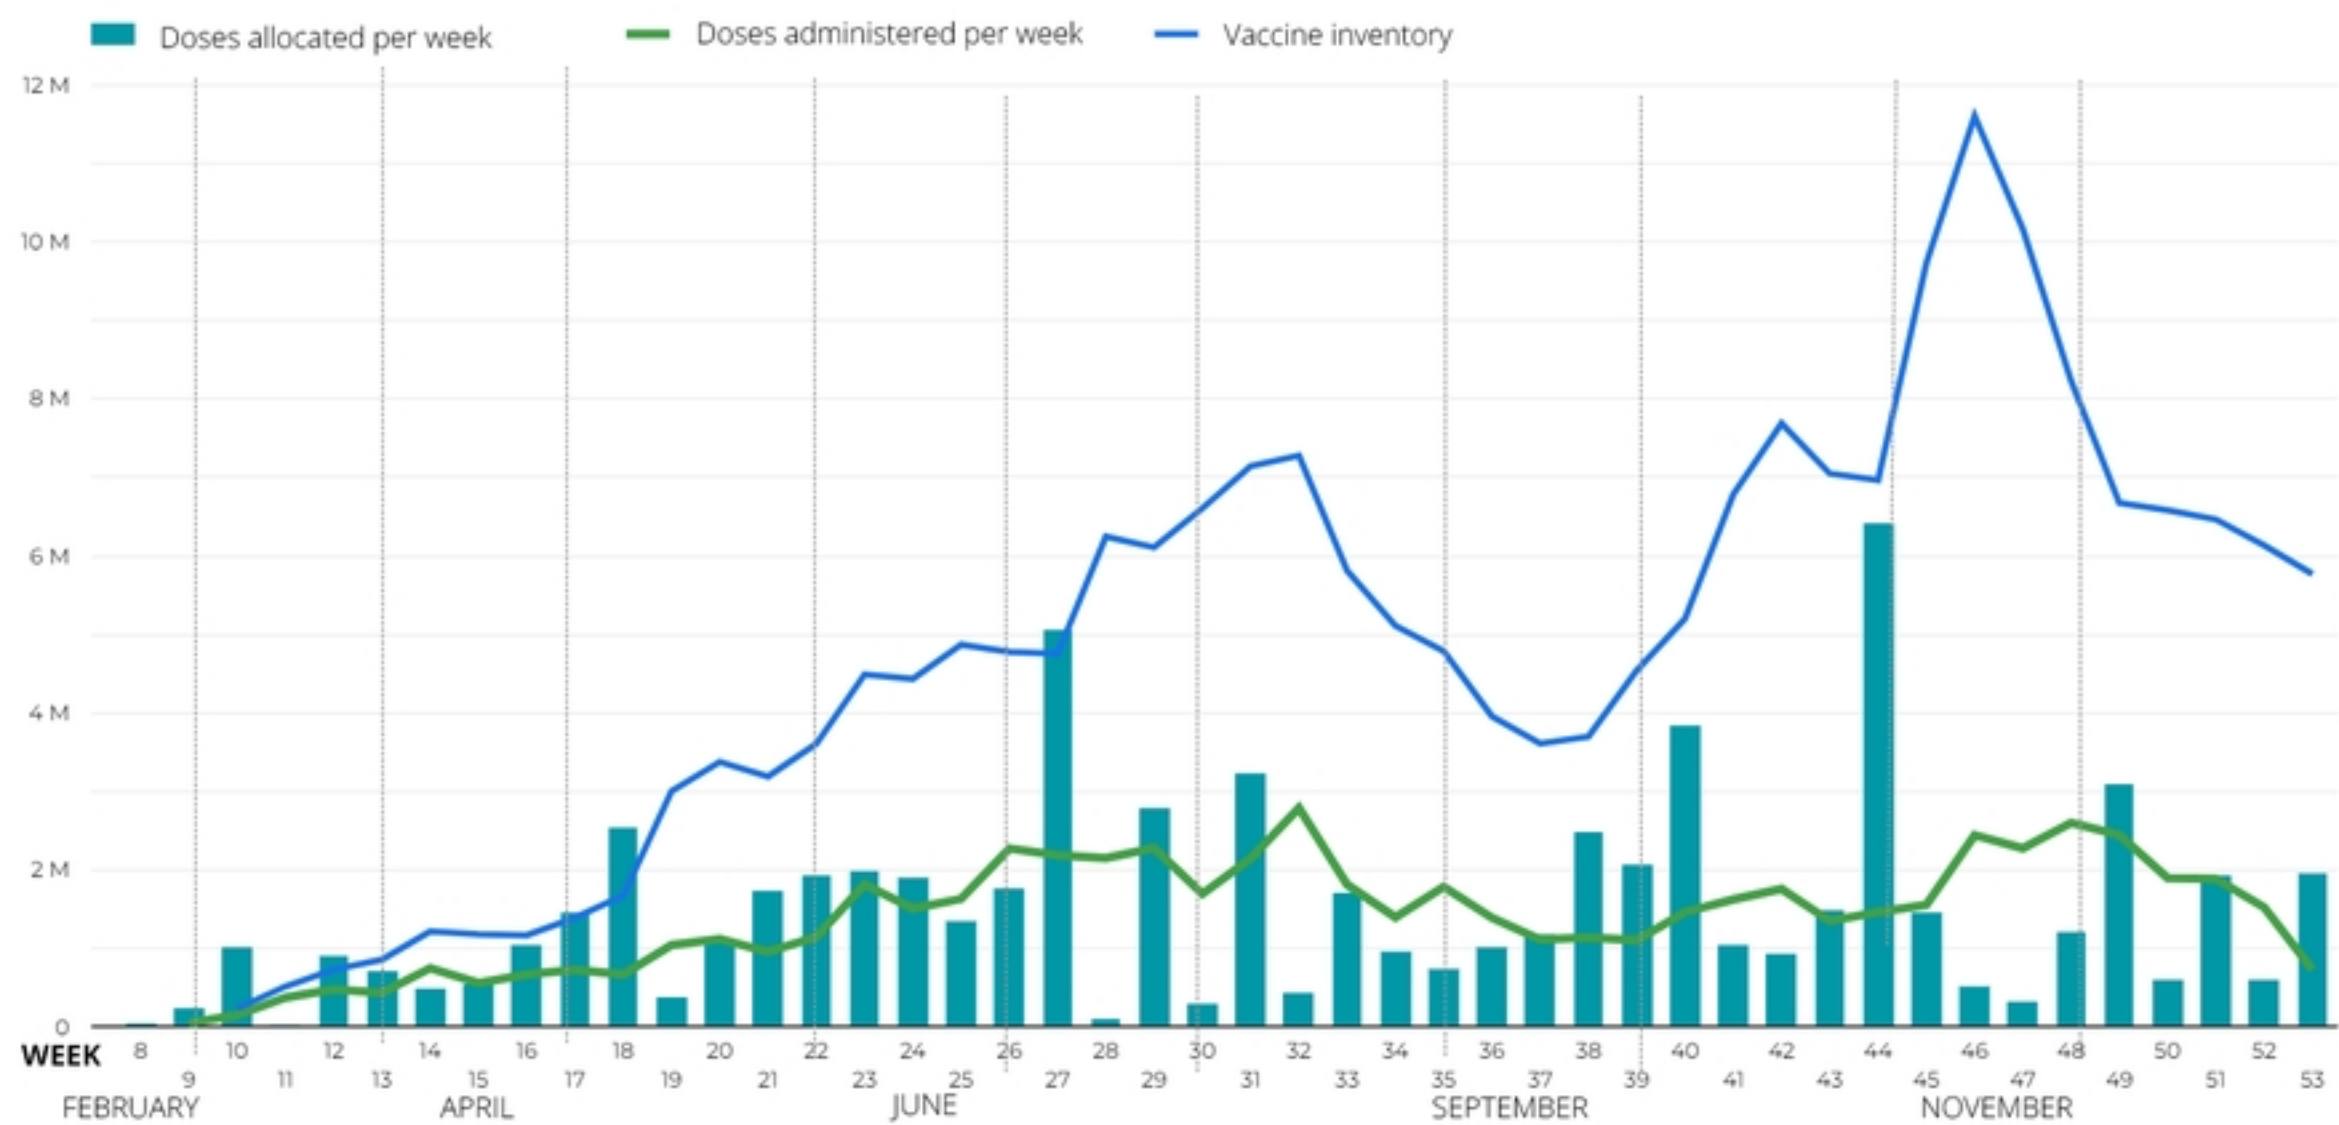

Figure 9

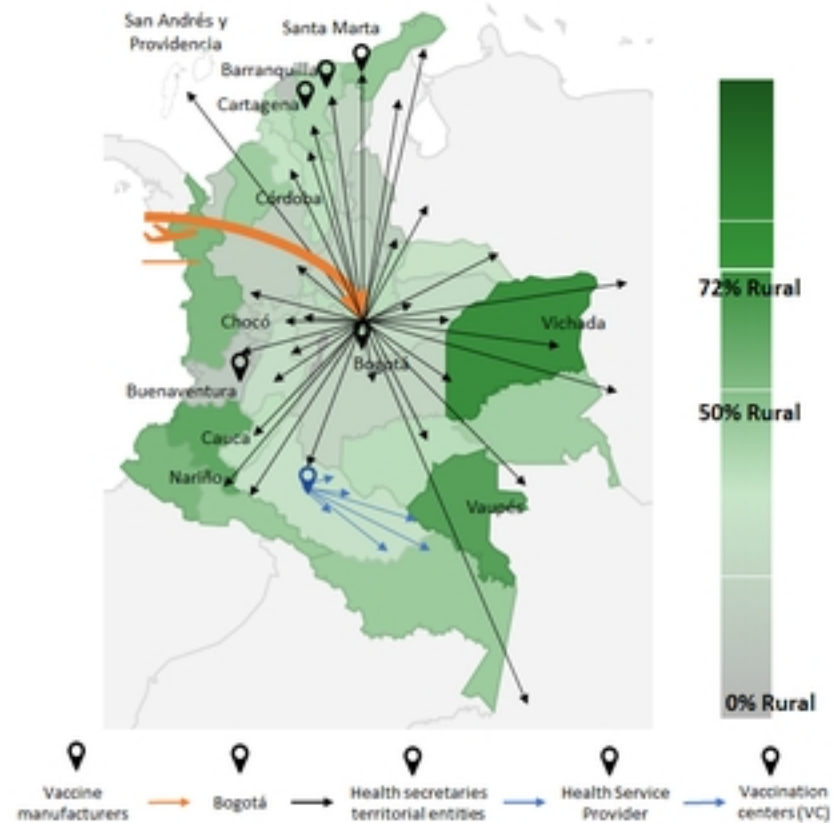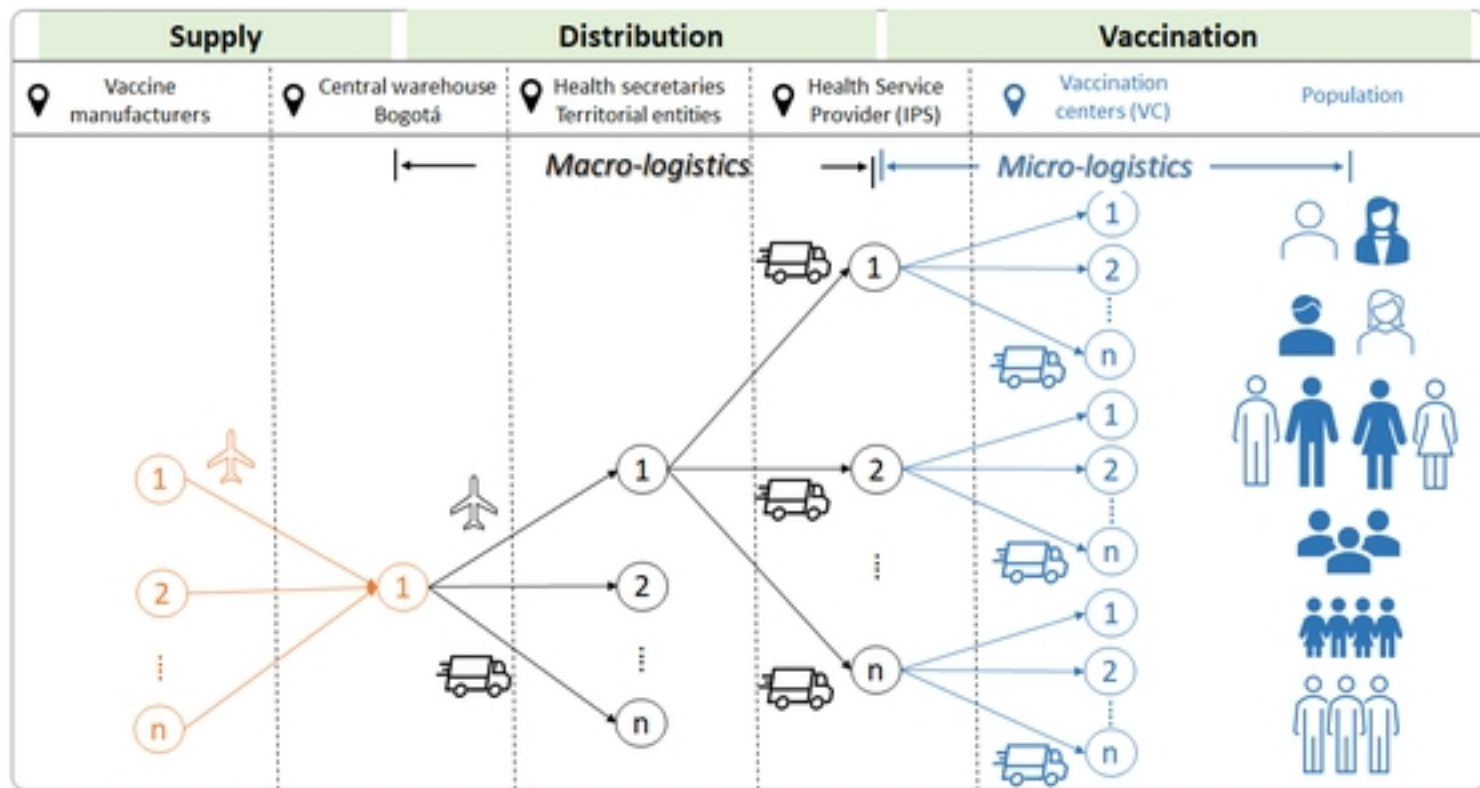

Figure 1

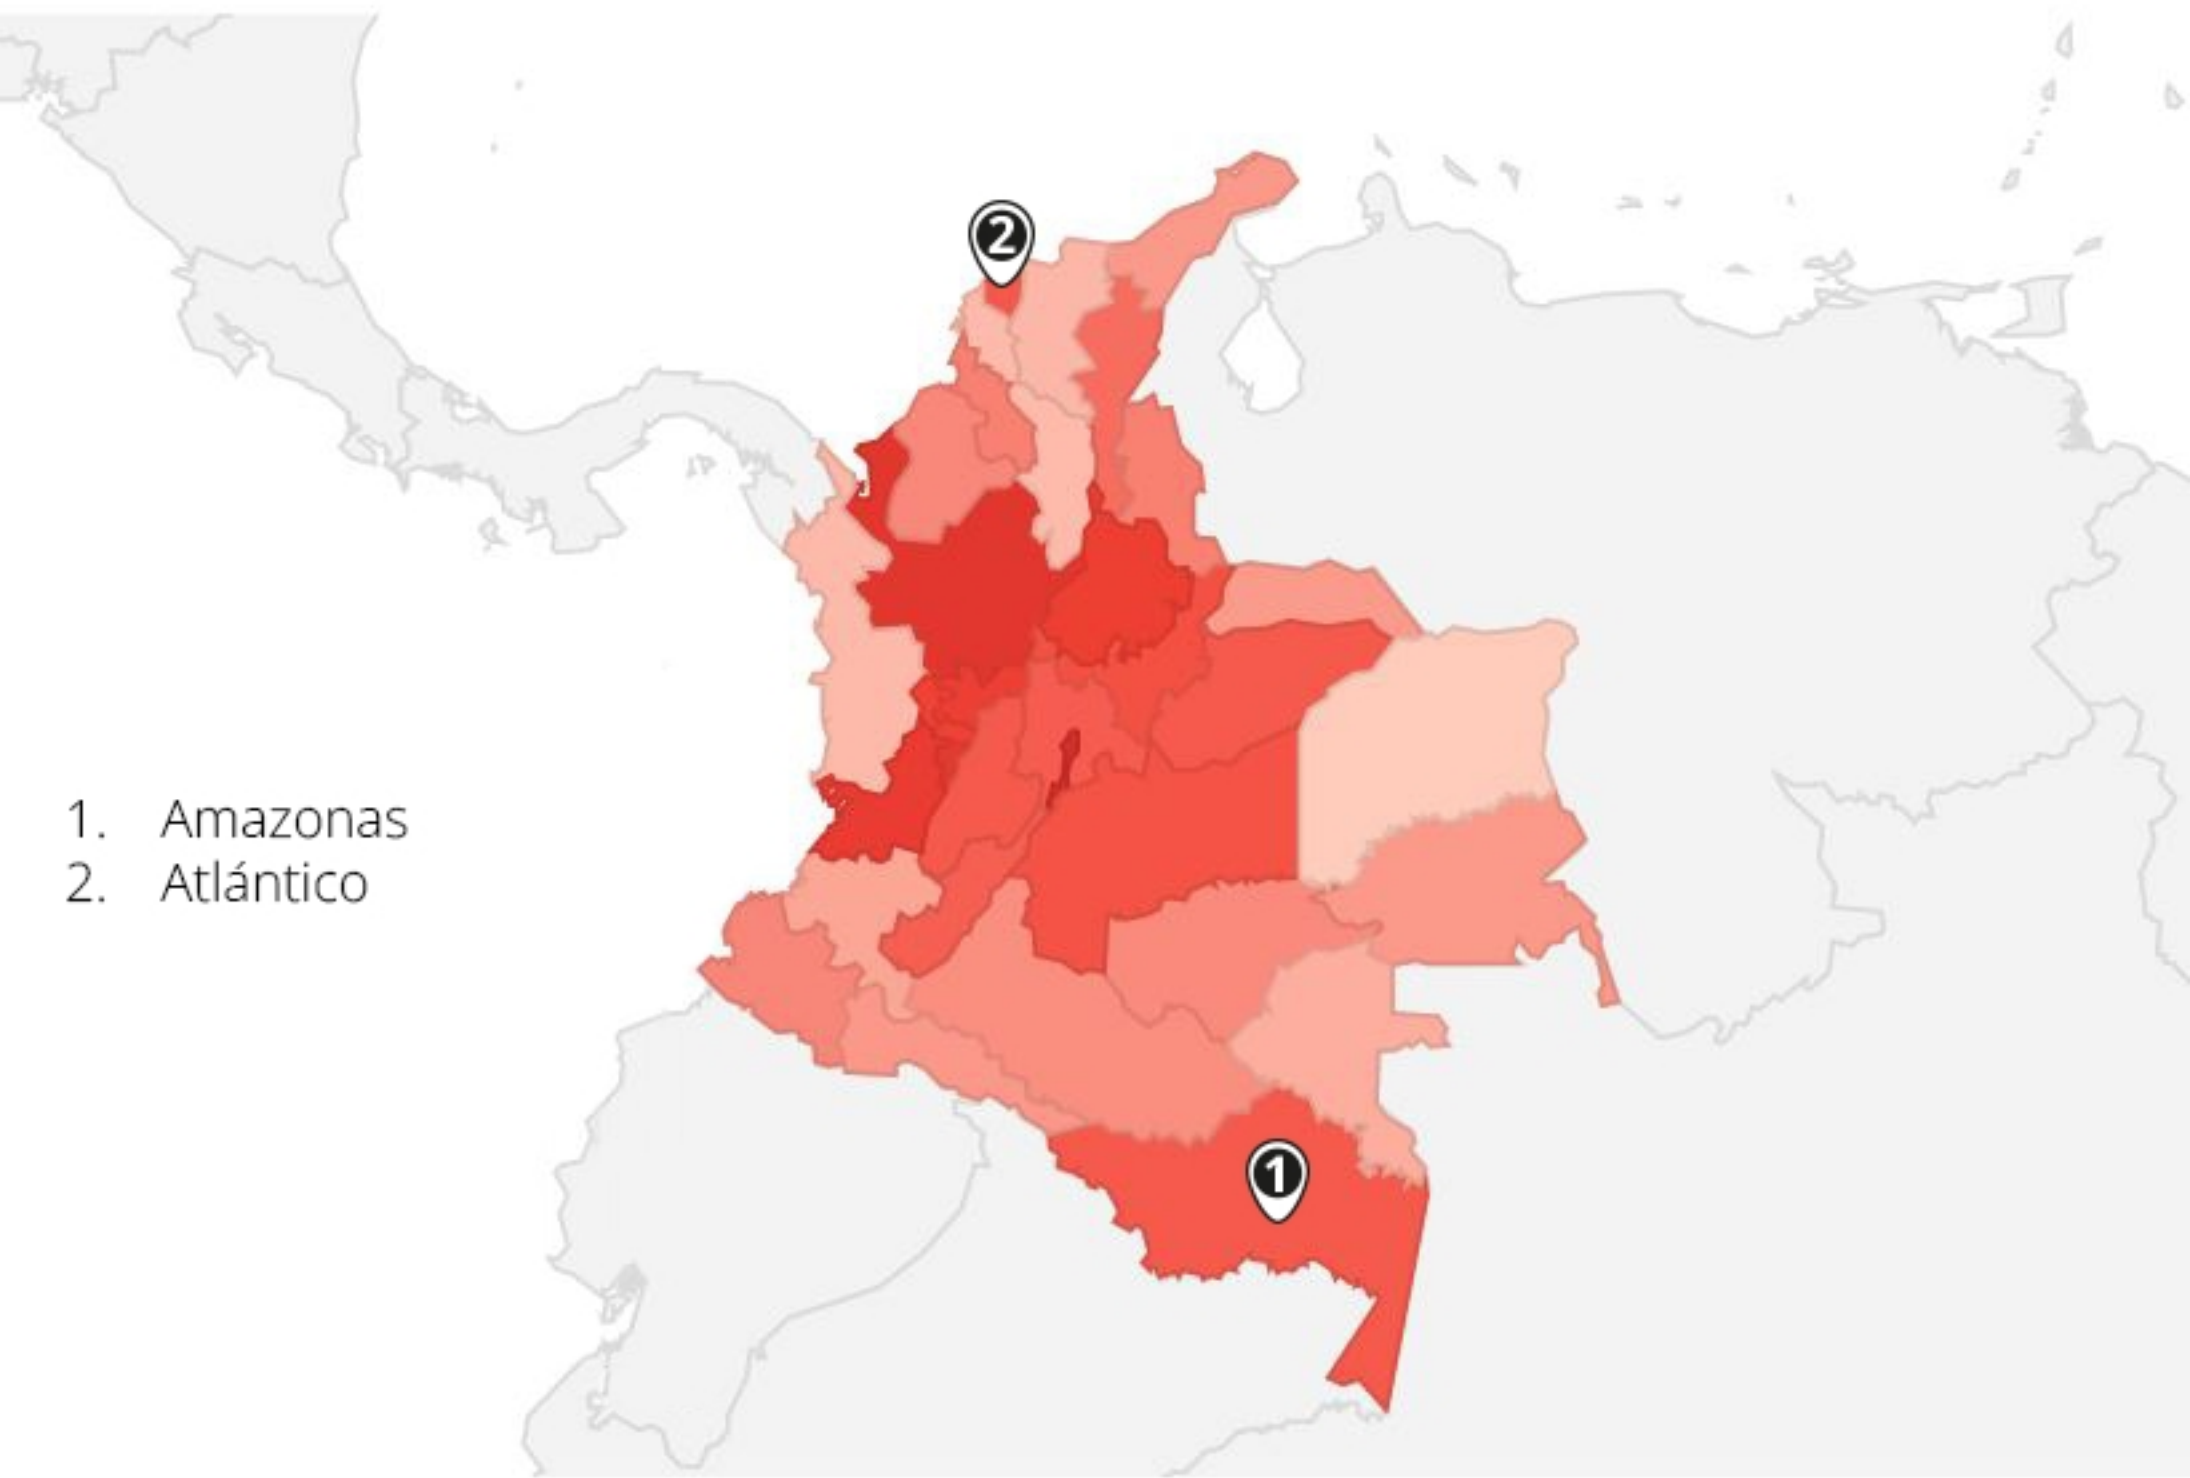

- 1. Amazonas
- 2. Atlántico

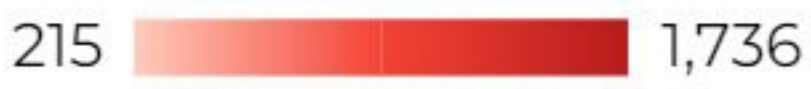

figure 2a

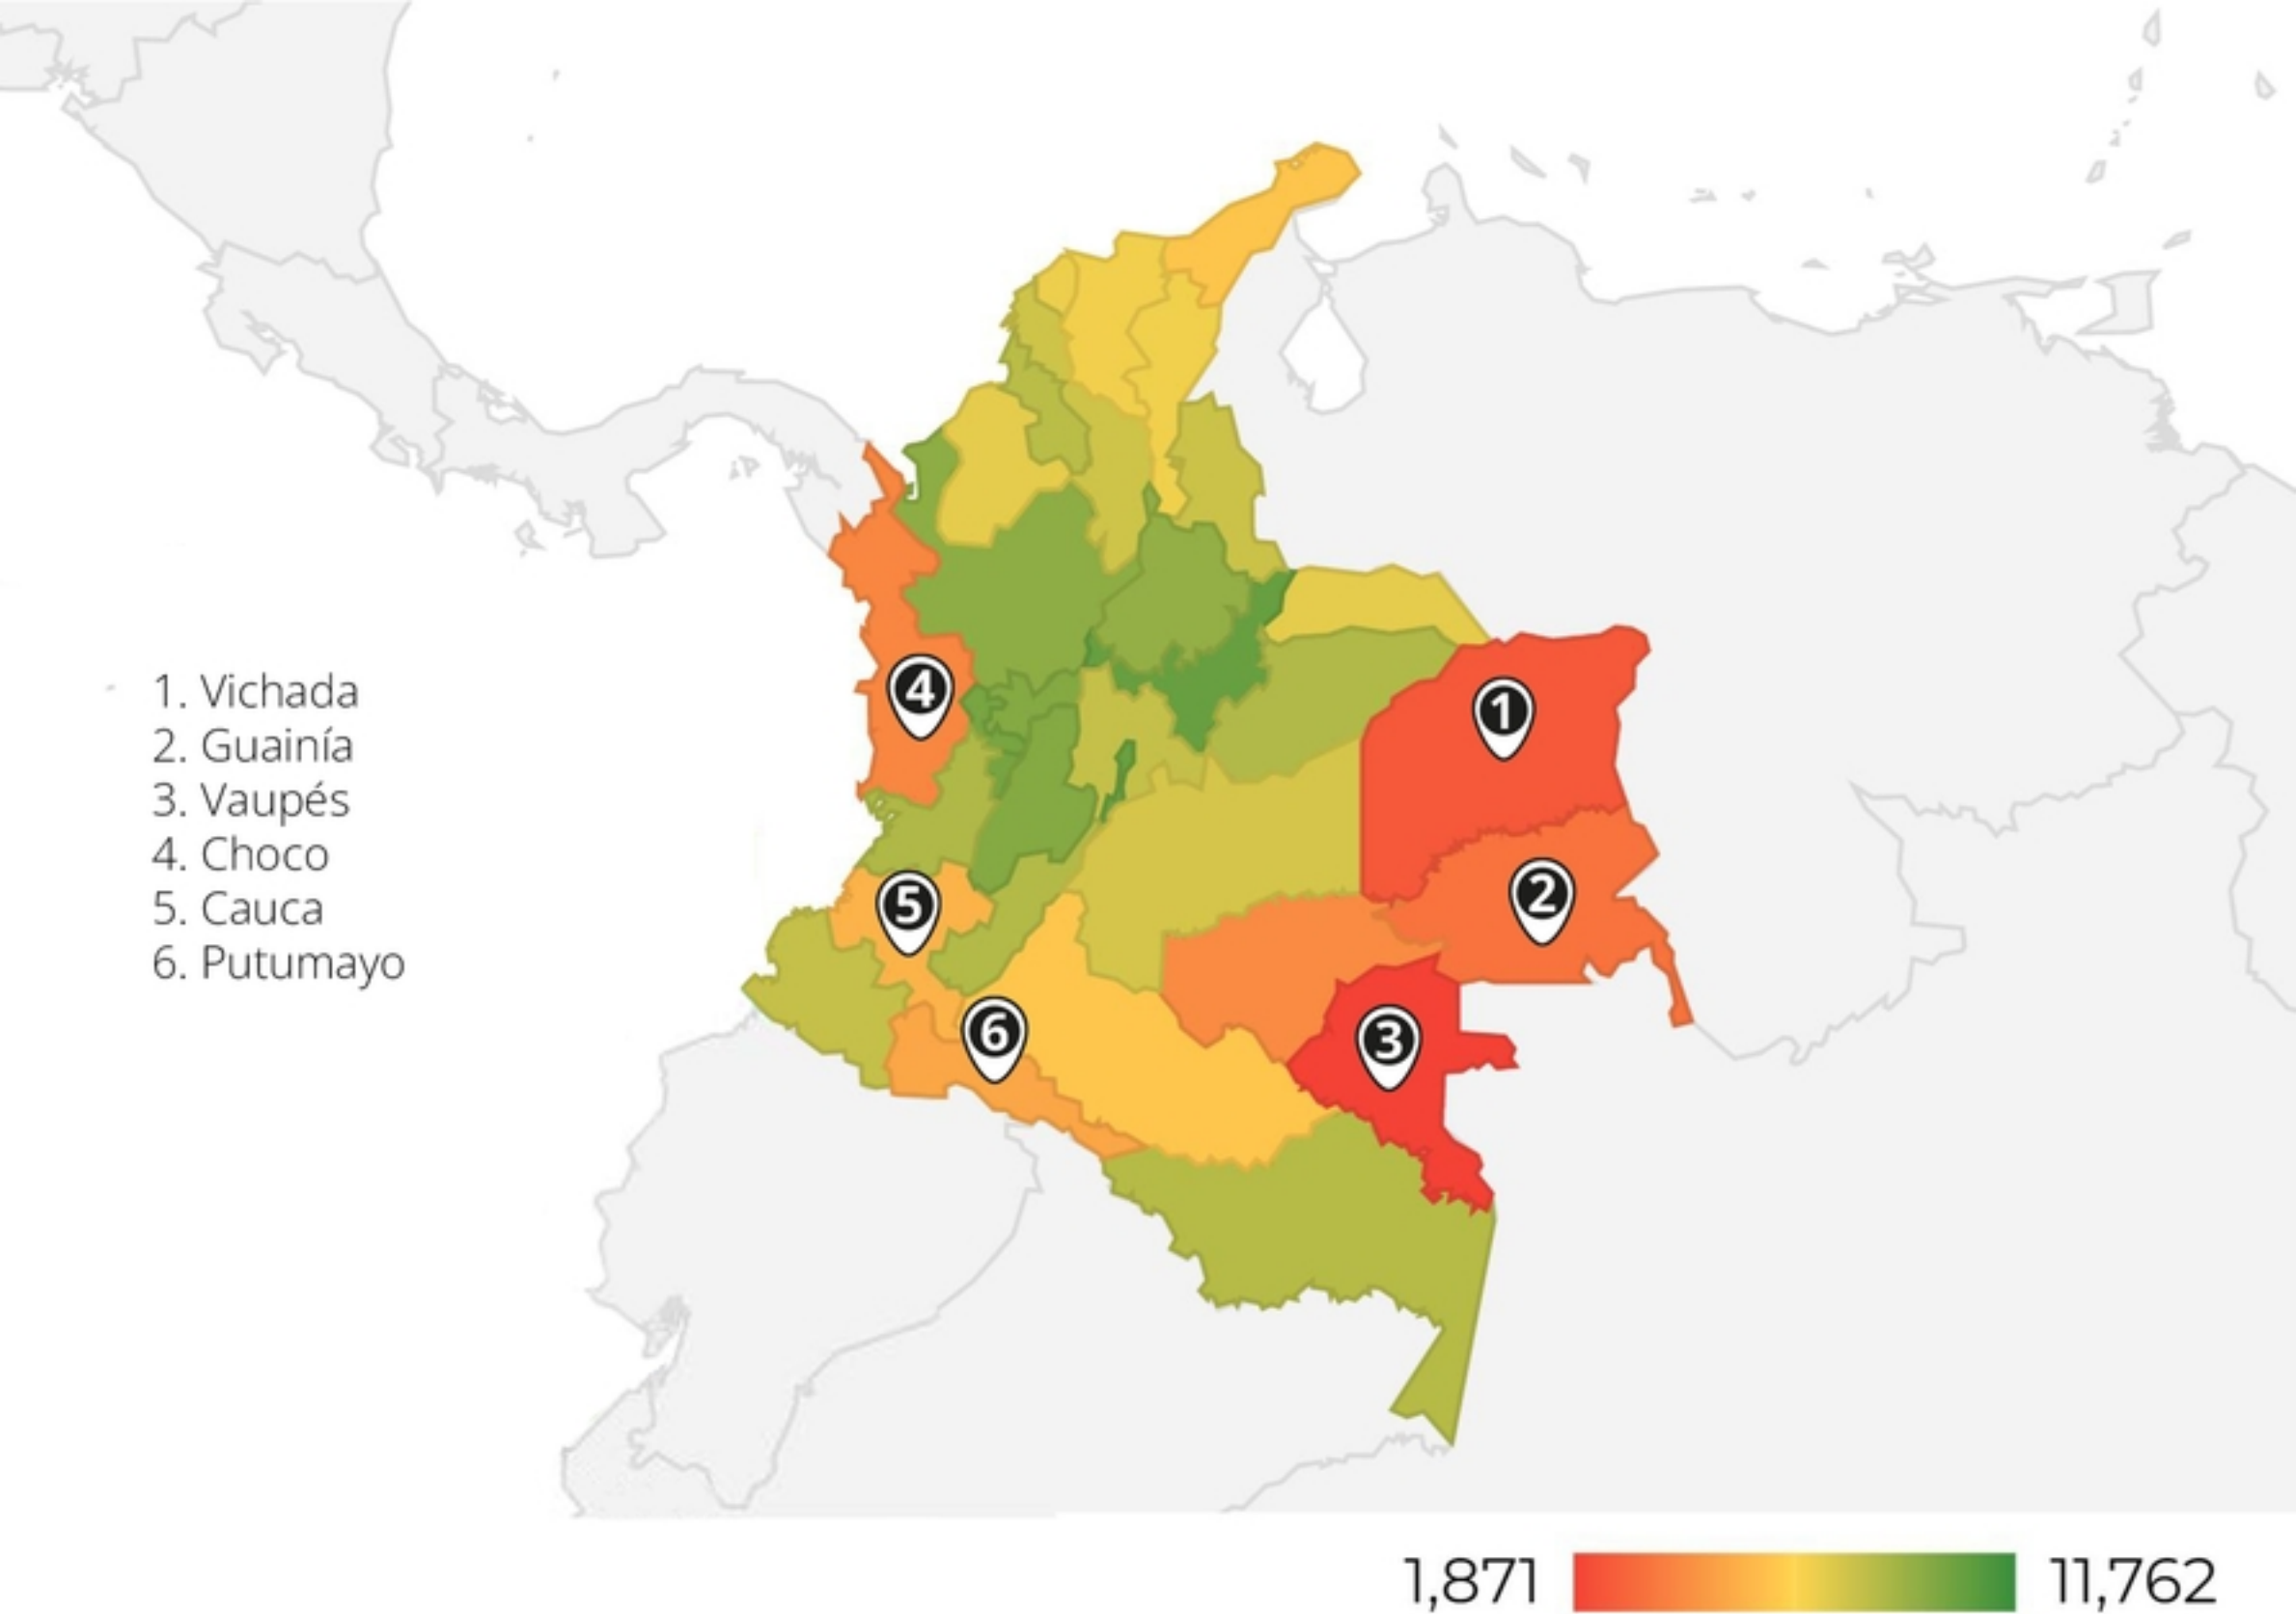

Figure 2b

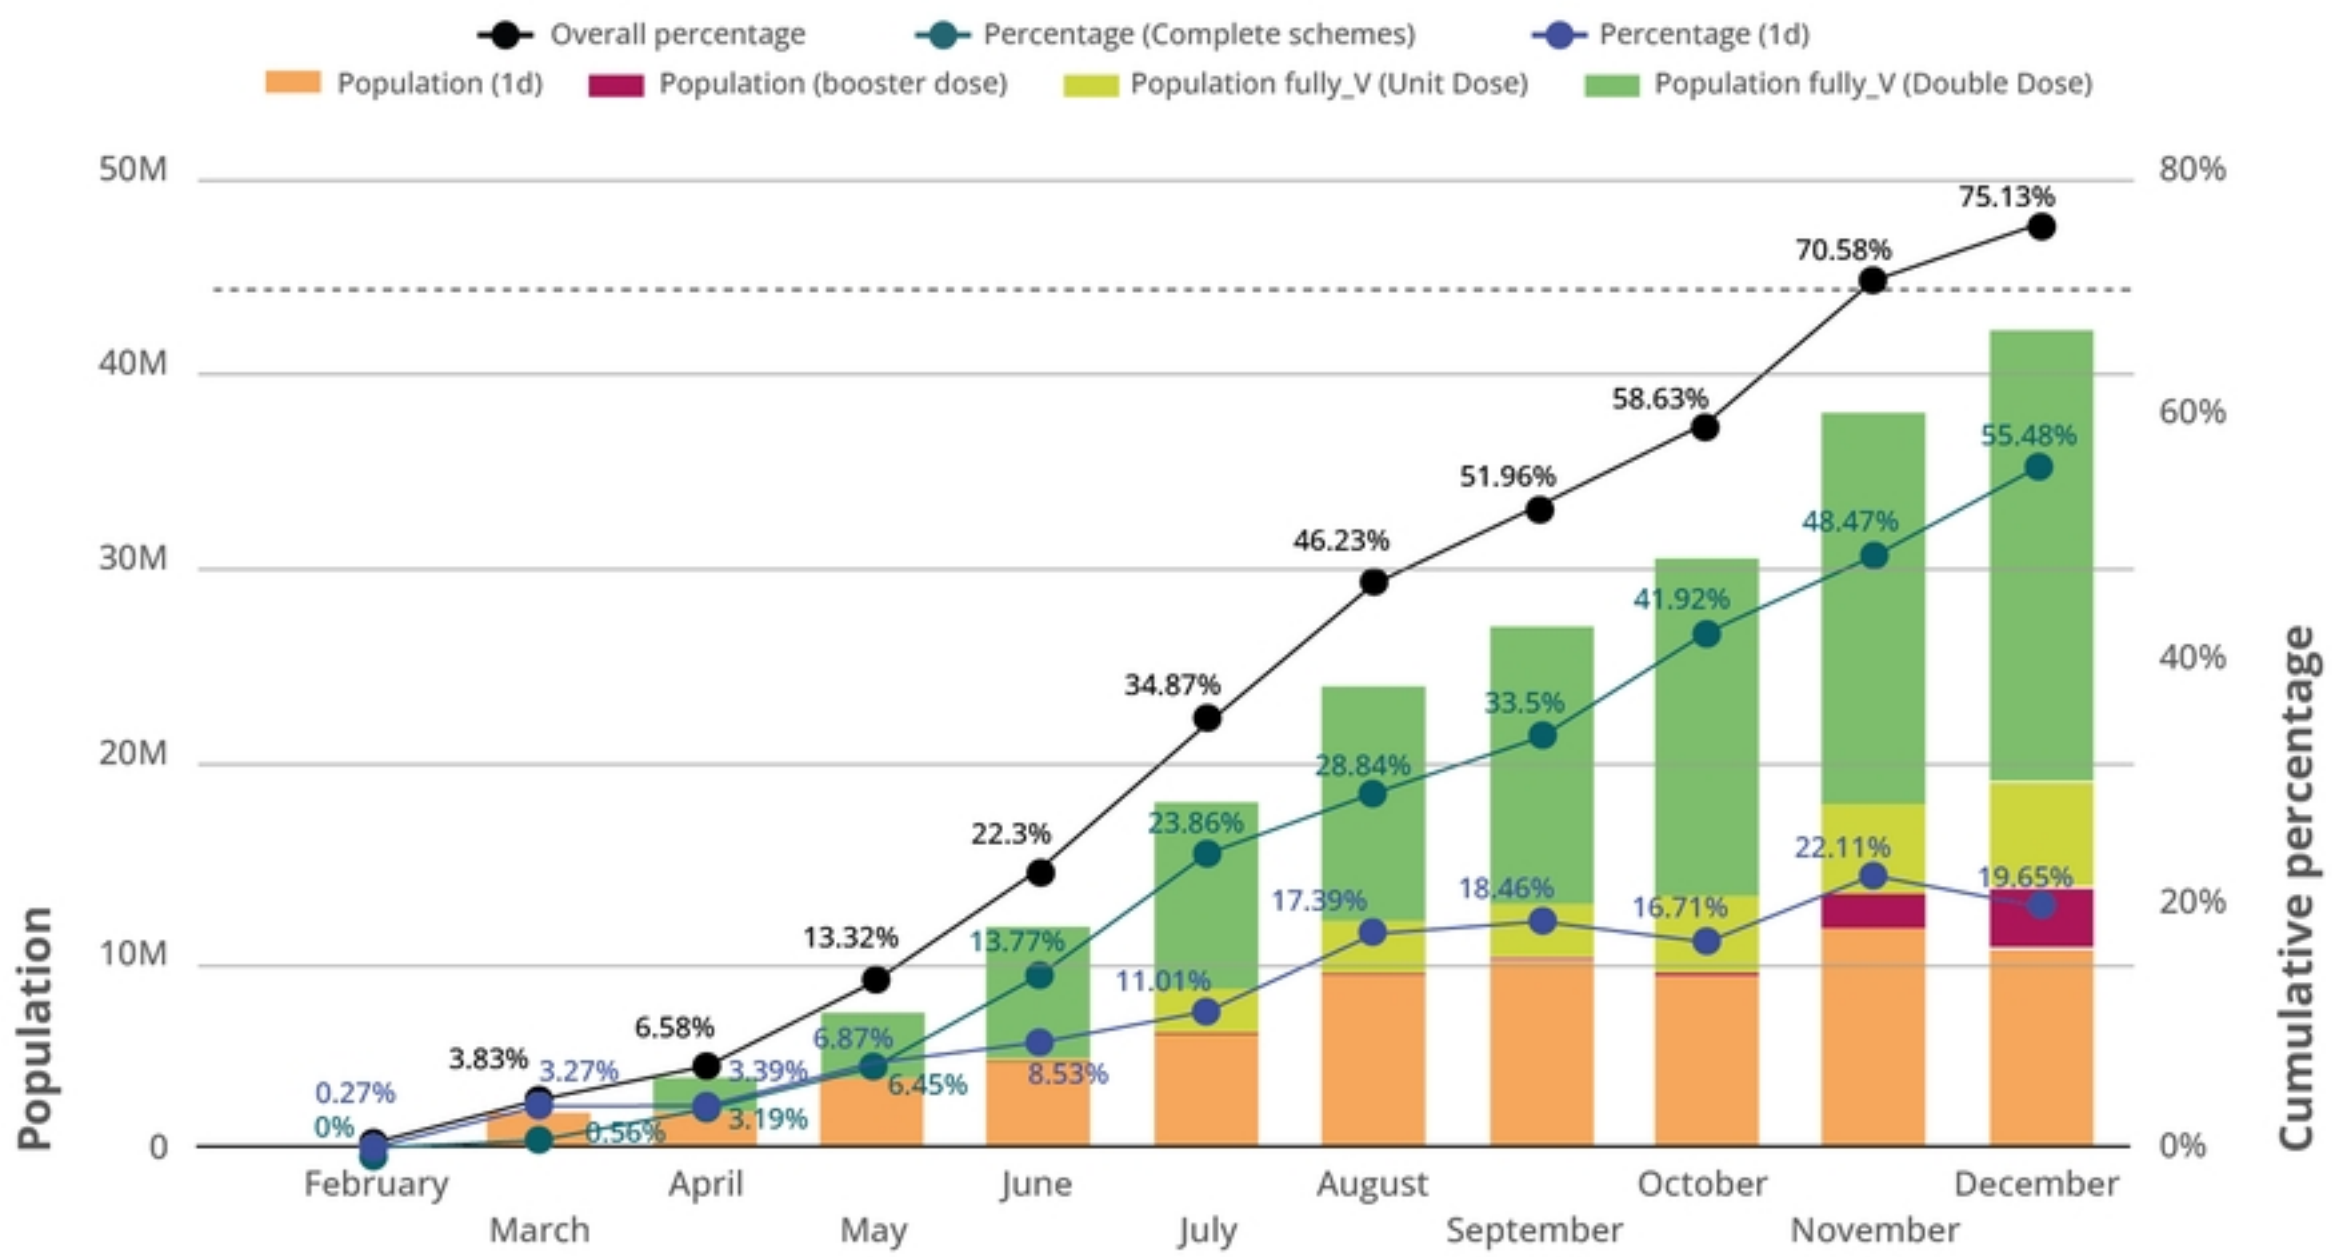

Figure 3



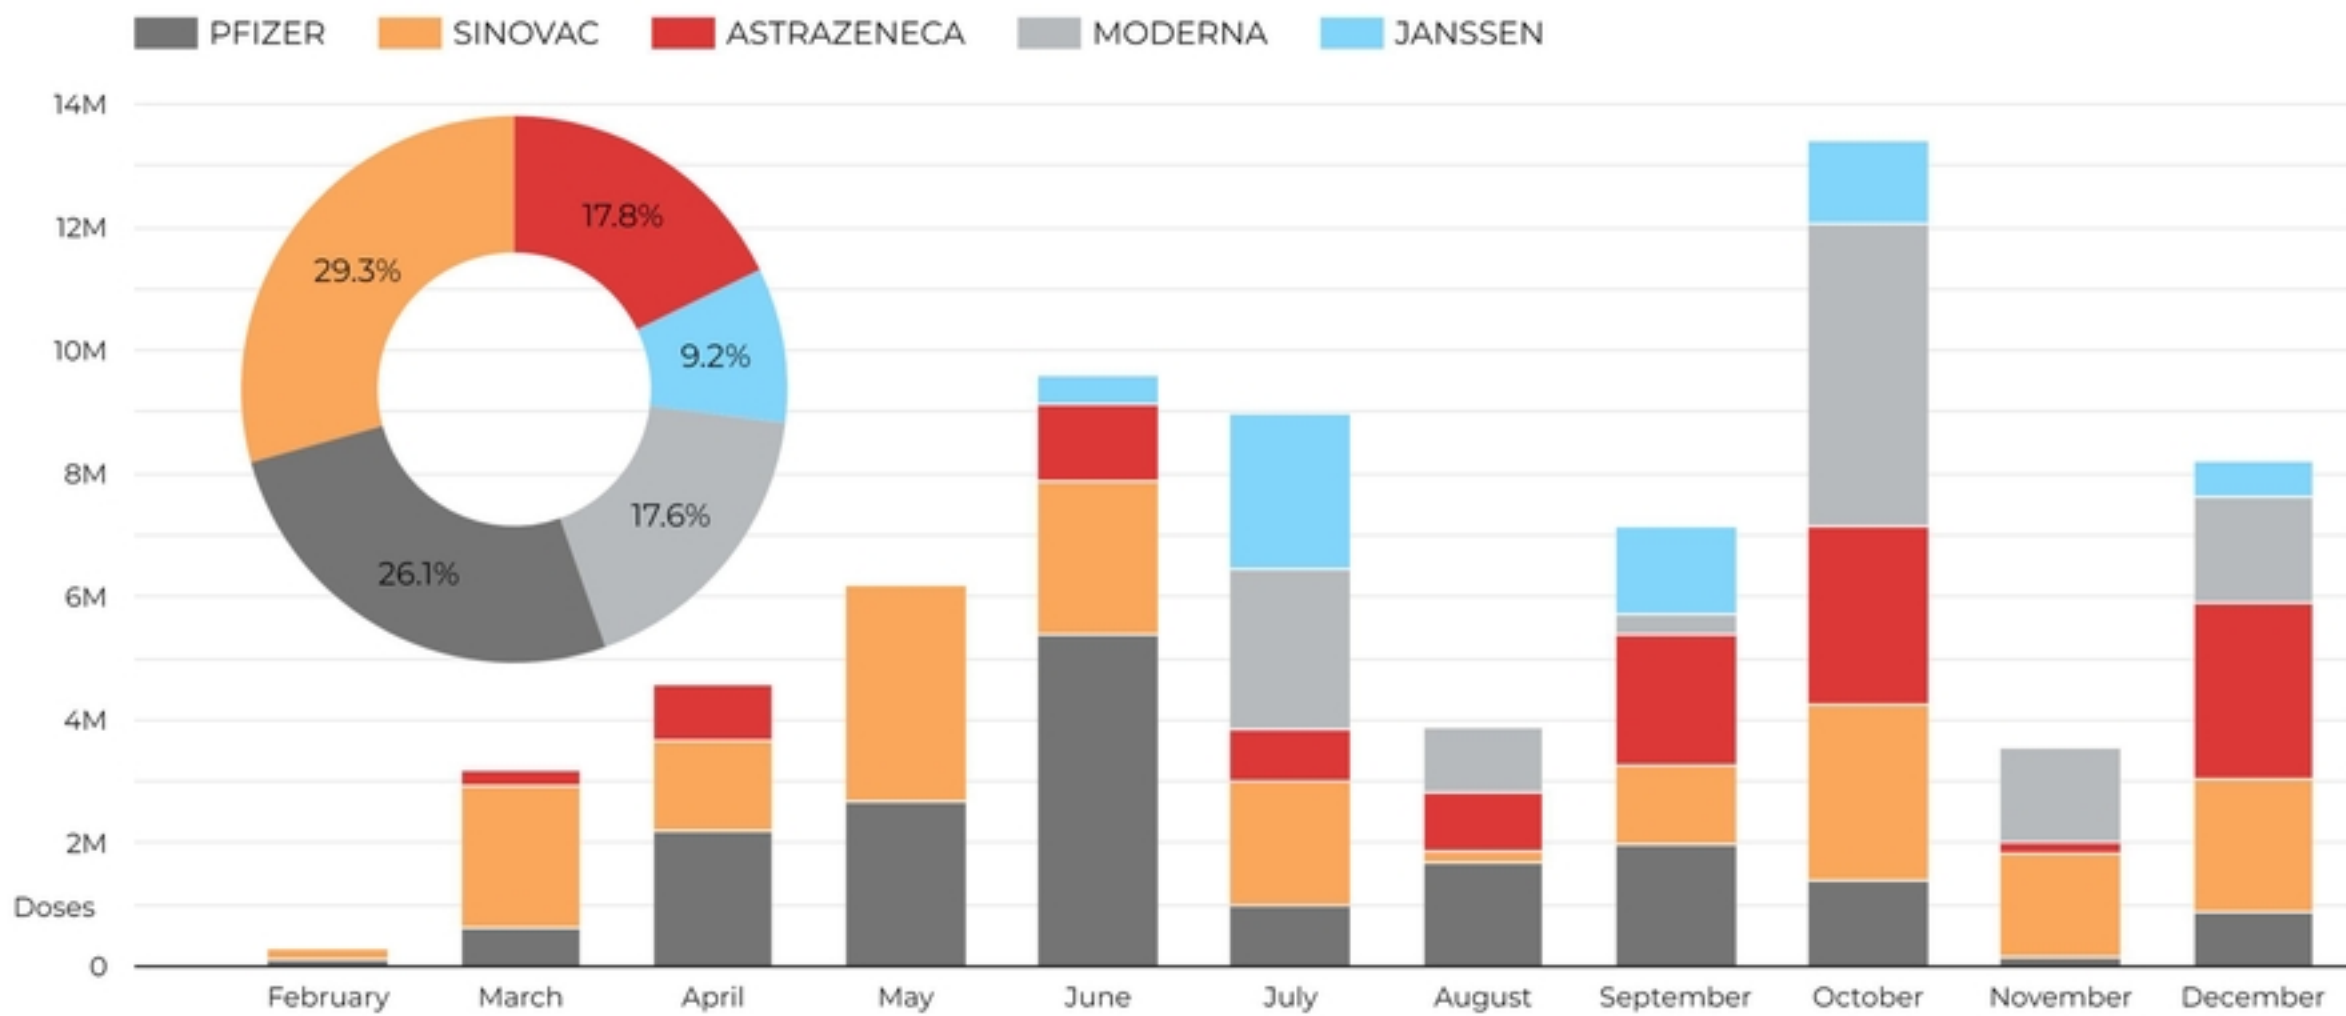

Figure 4

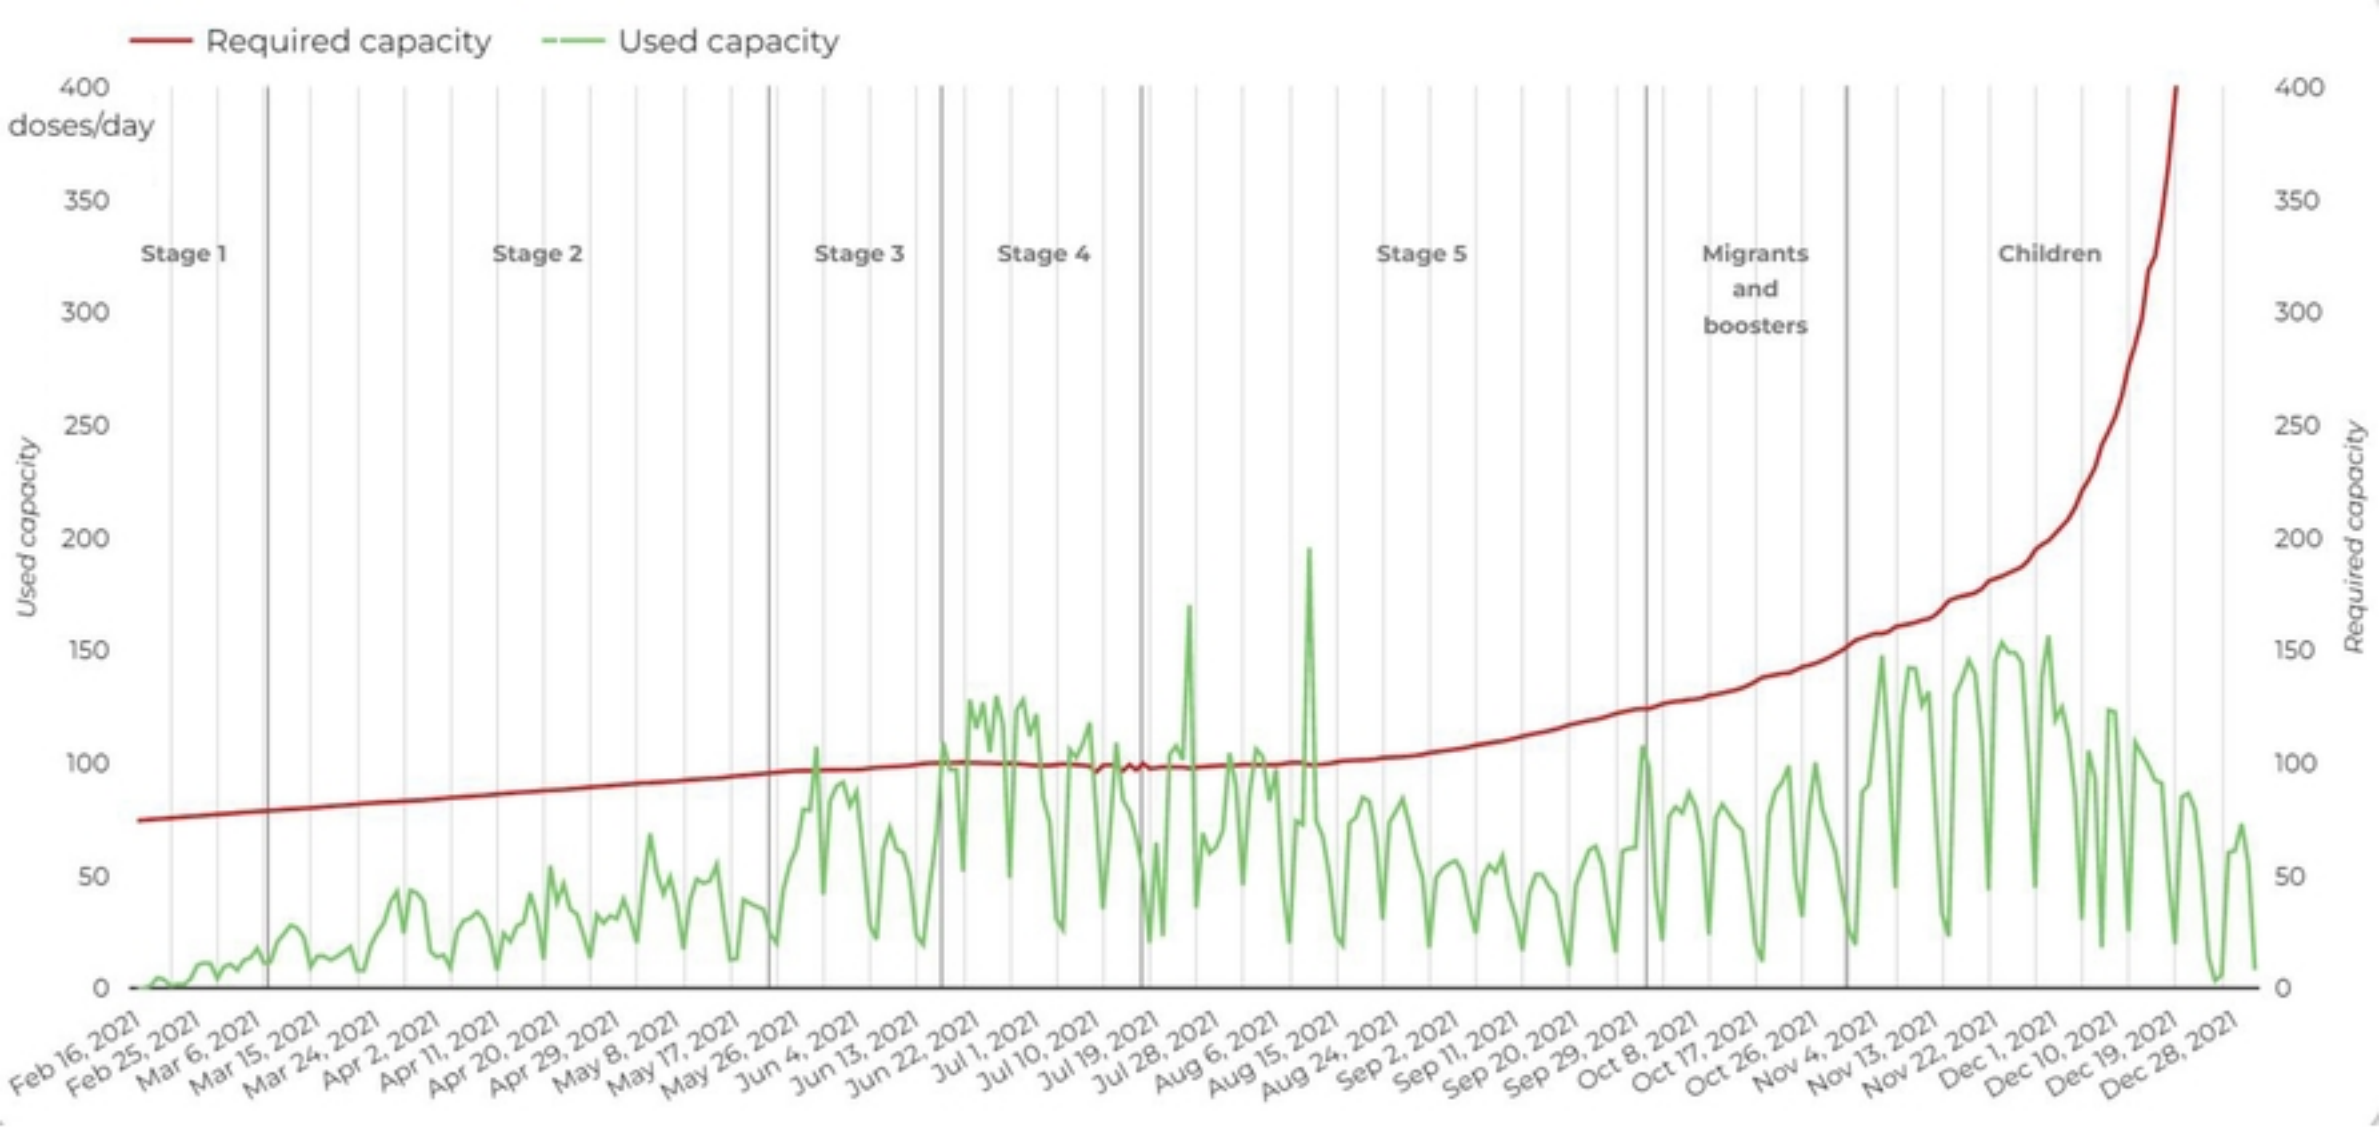

Figure 5

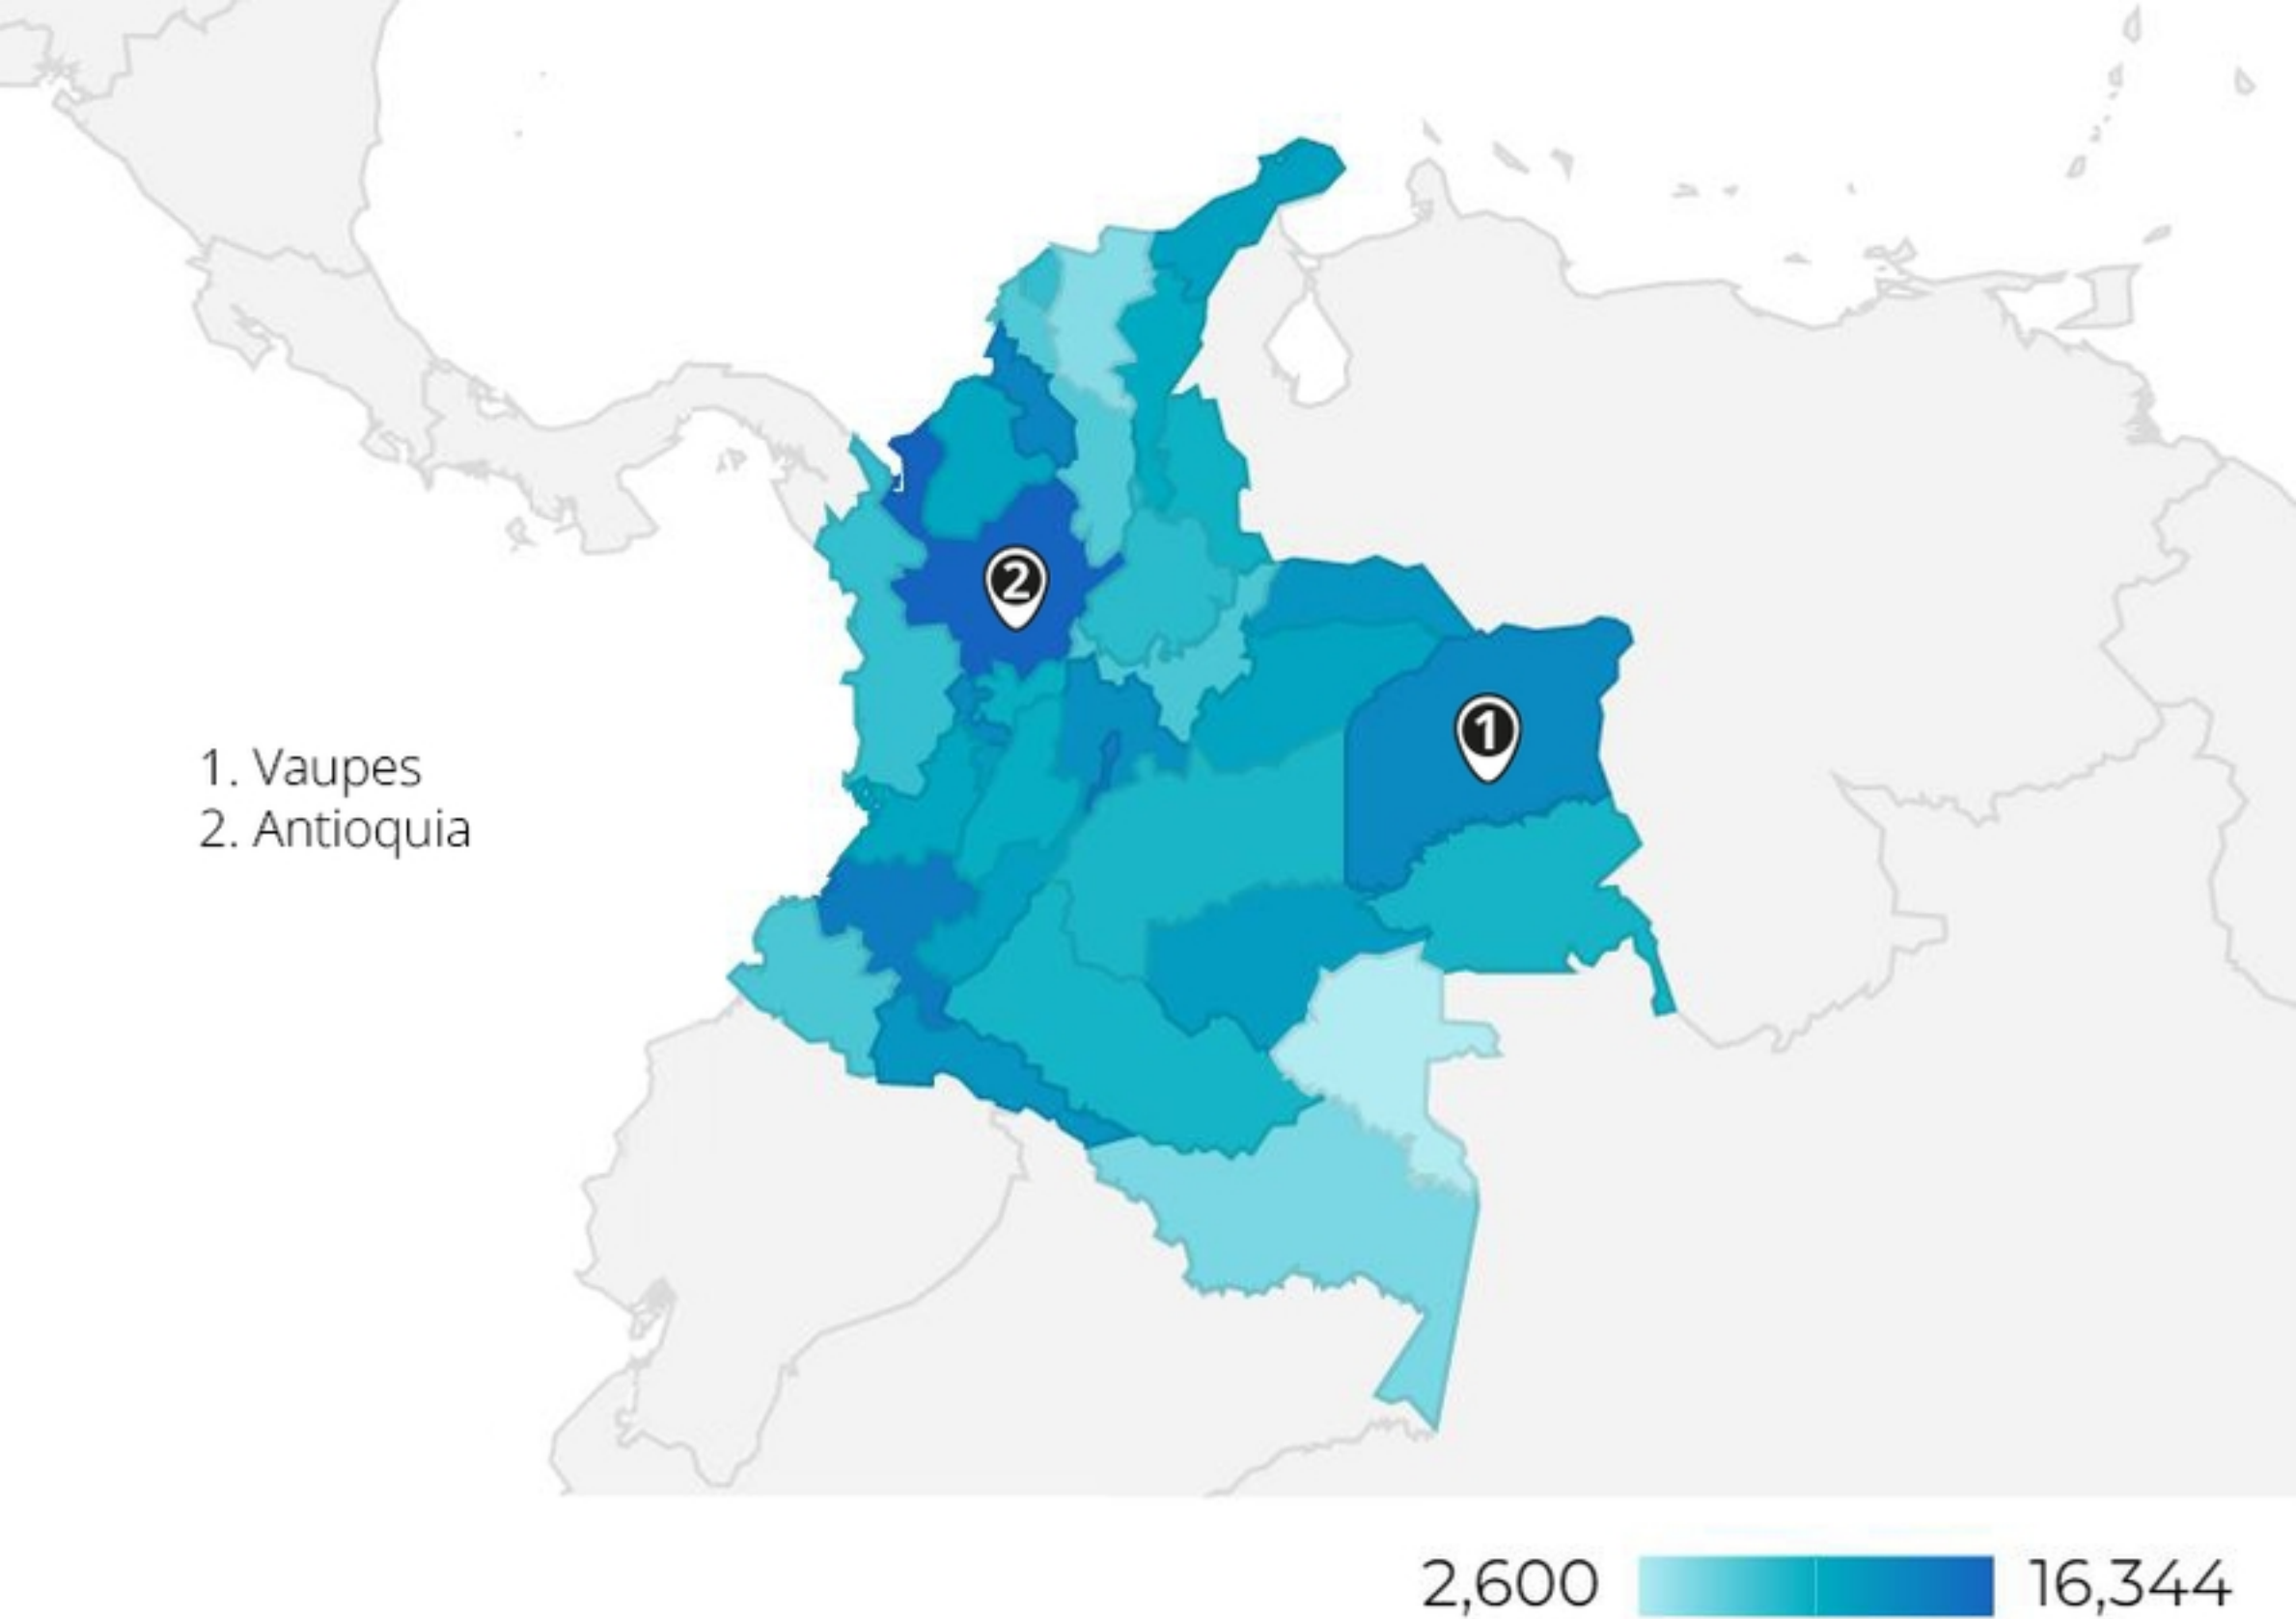

Figure 6a

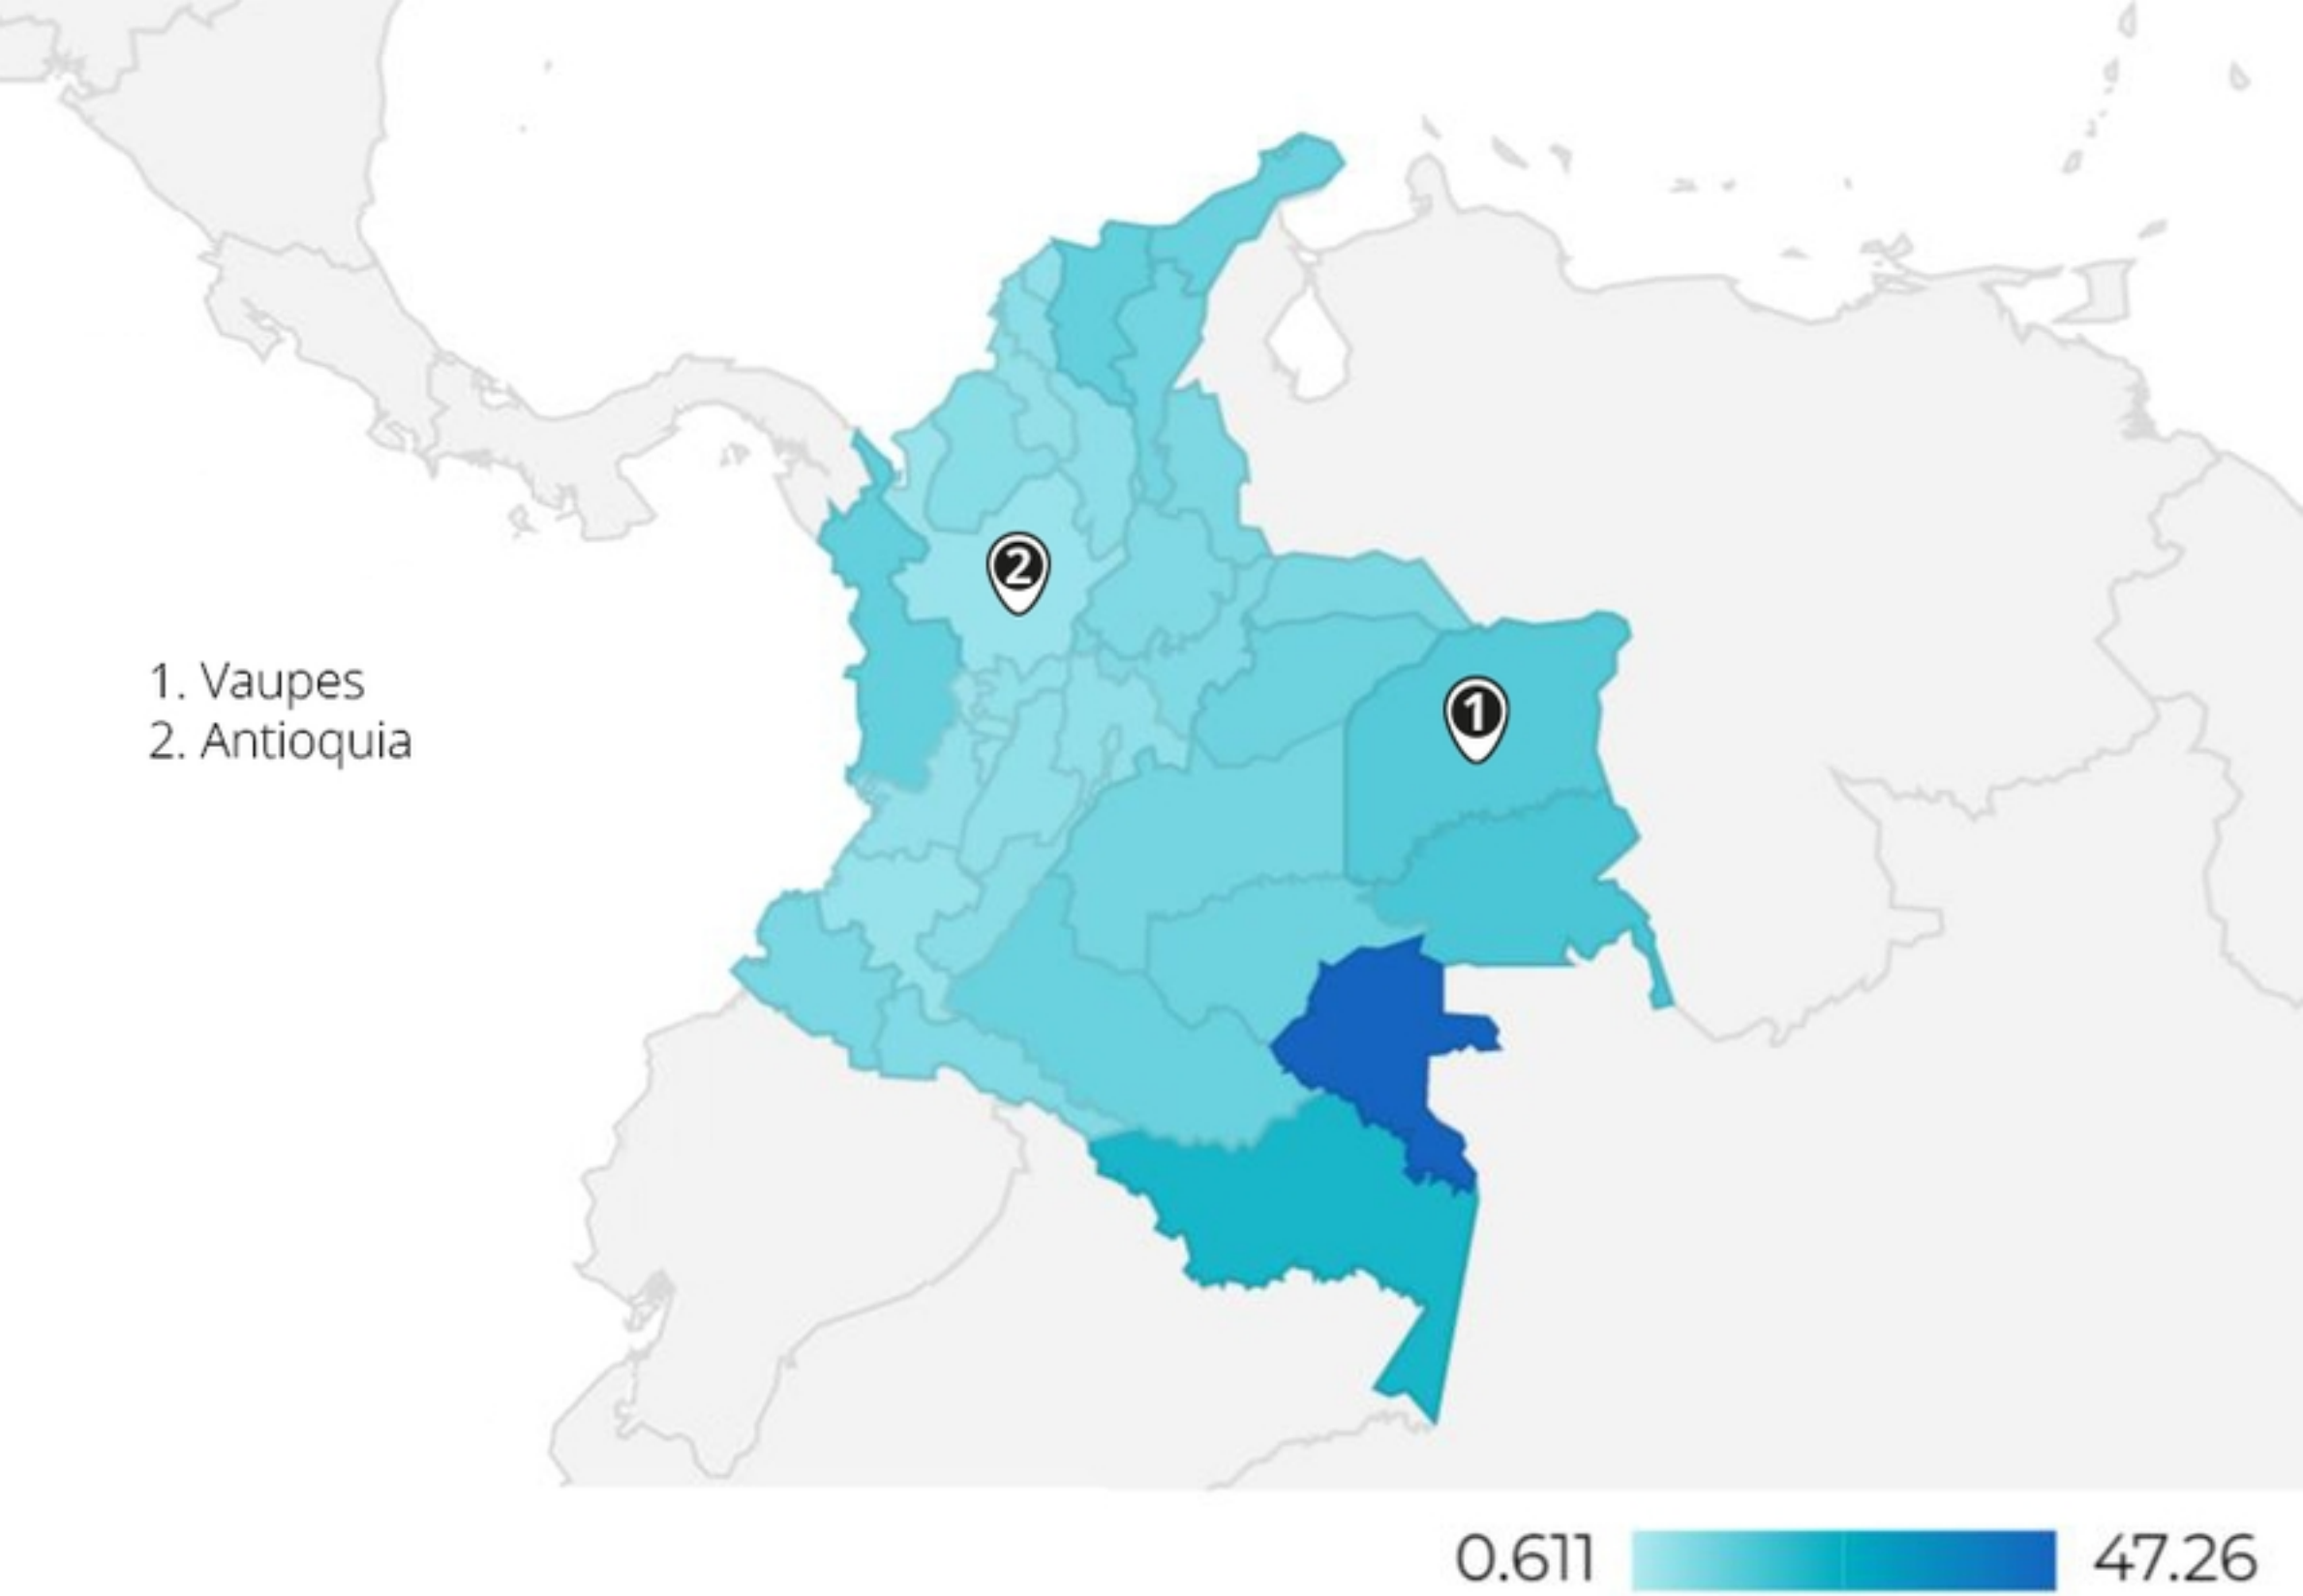

Figure 6b

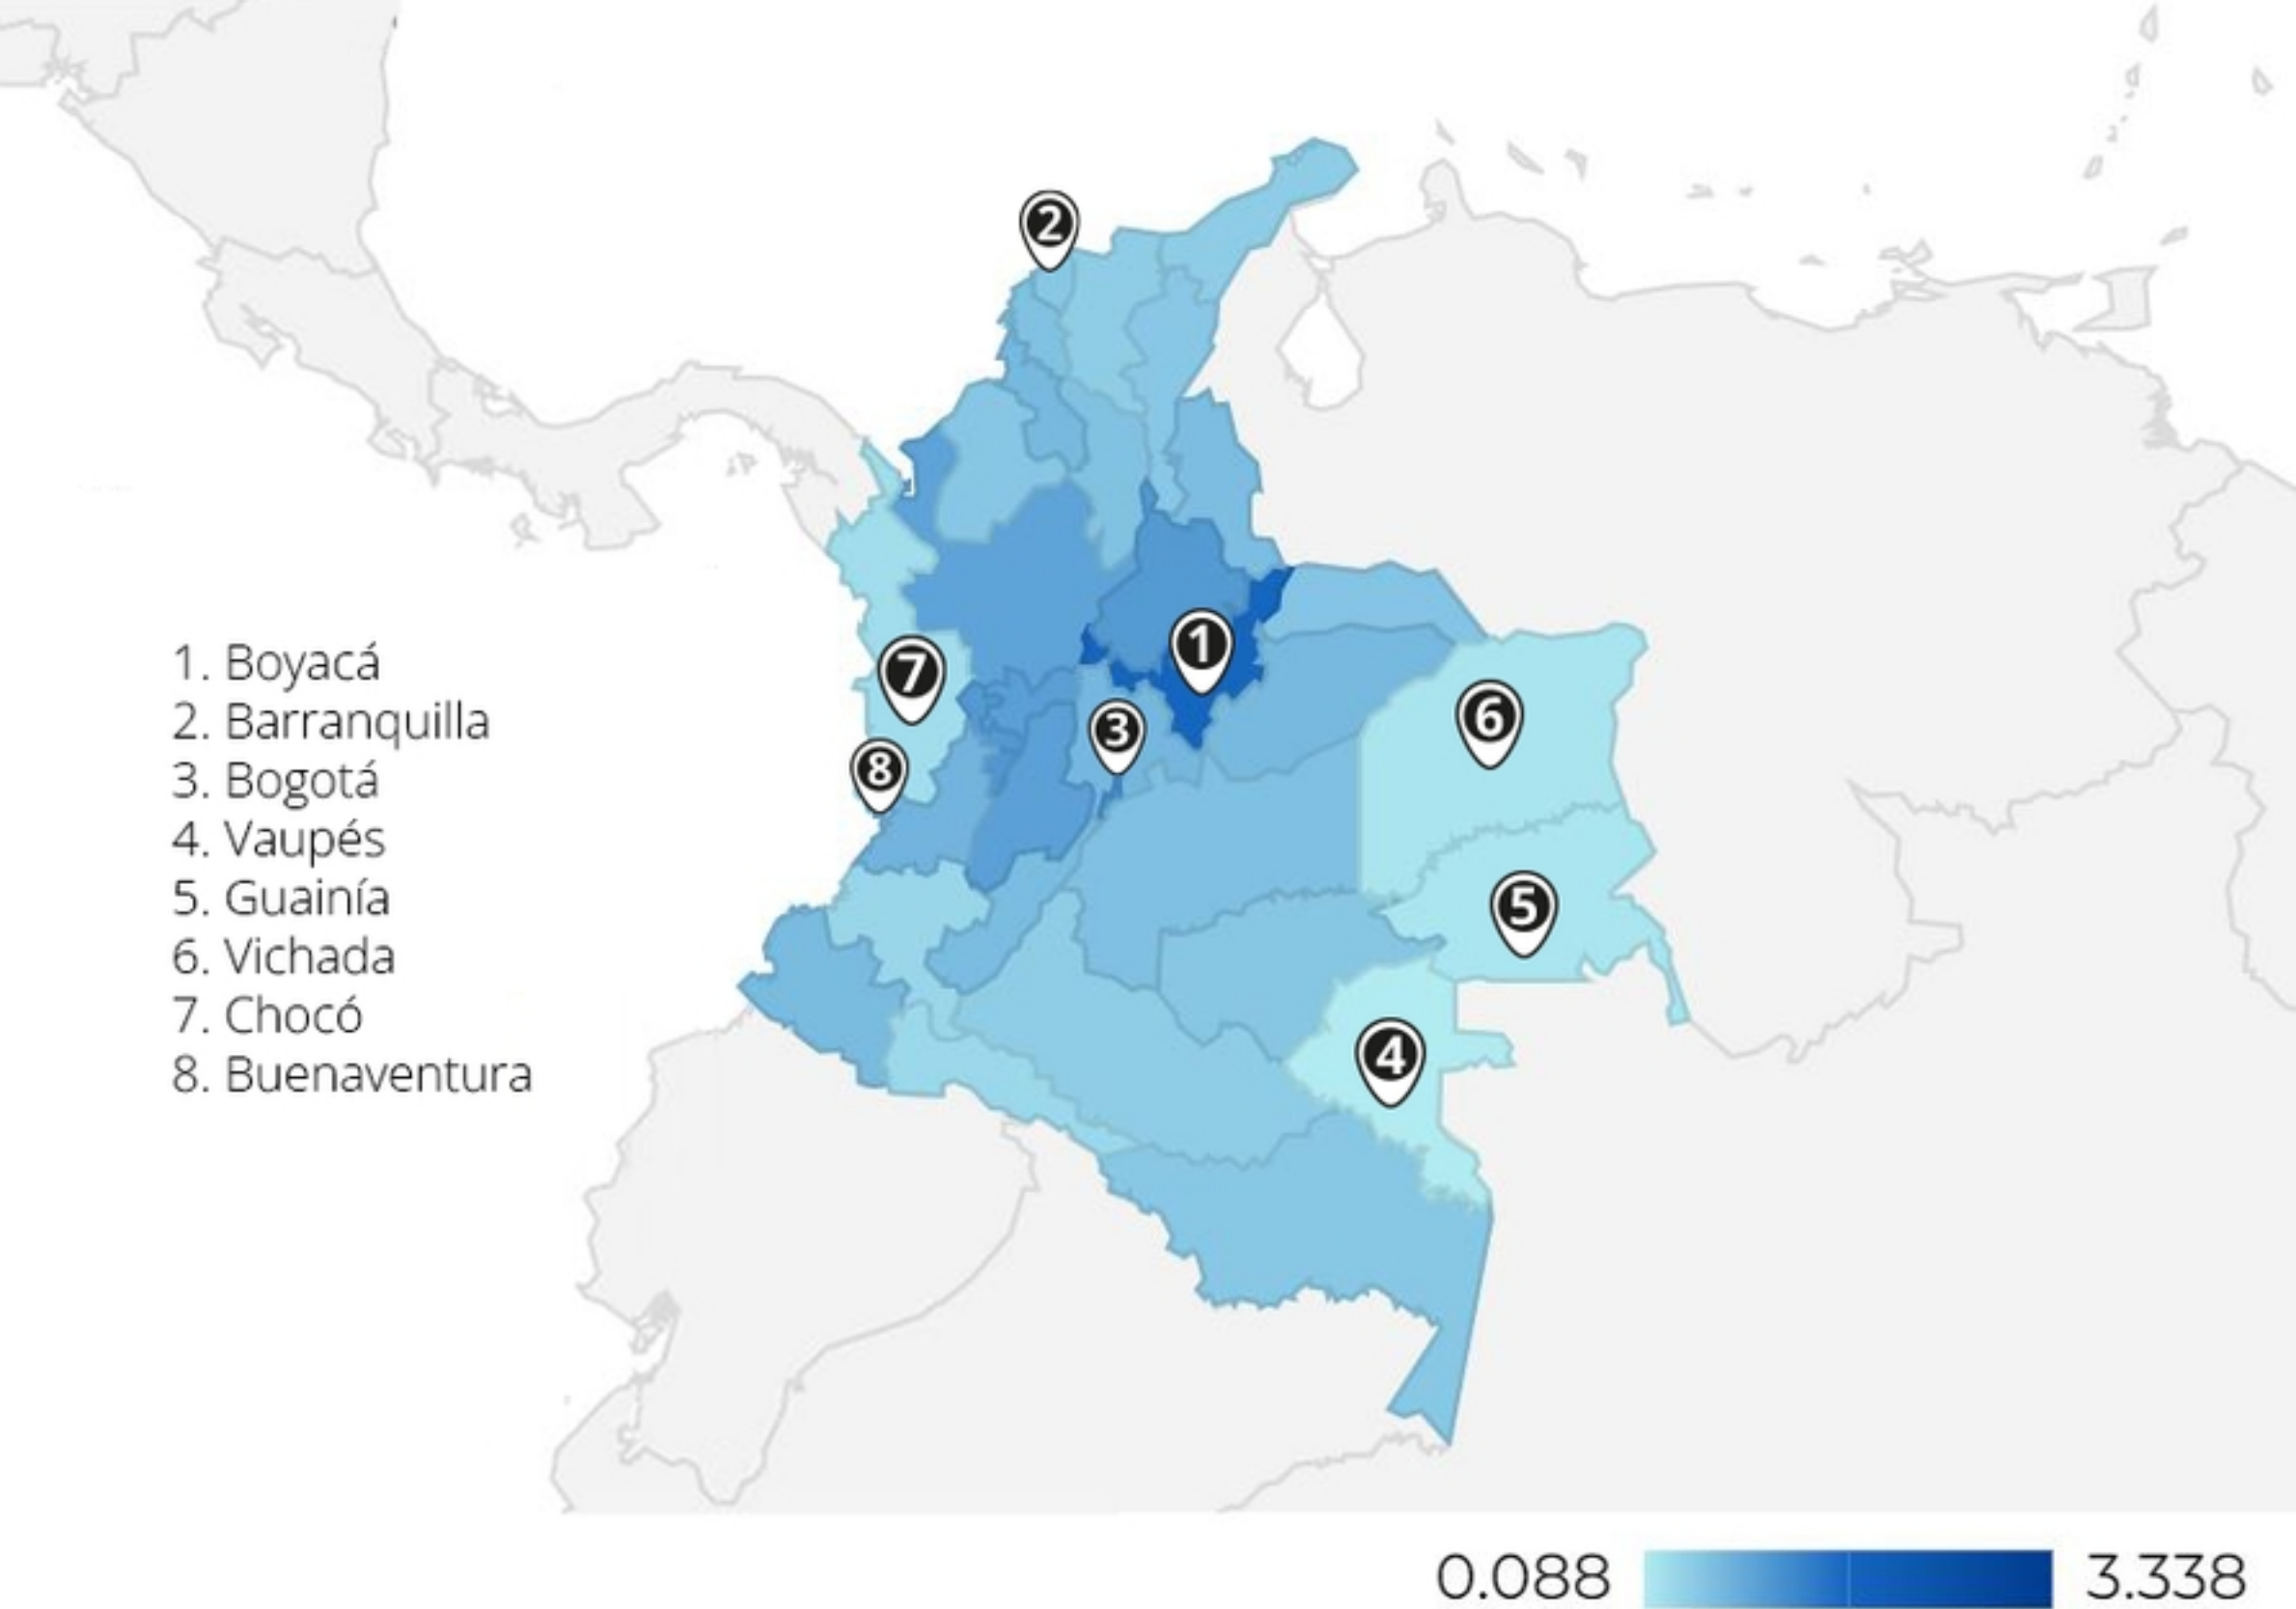

Figure 6c
